# Supplementary material
Source: PubMed Central journal article supplement (PMC6472932)
Supplement: NIHMS1507935-supplement-4.pdf [file NIHMS1507935-supplement-4.pdf]

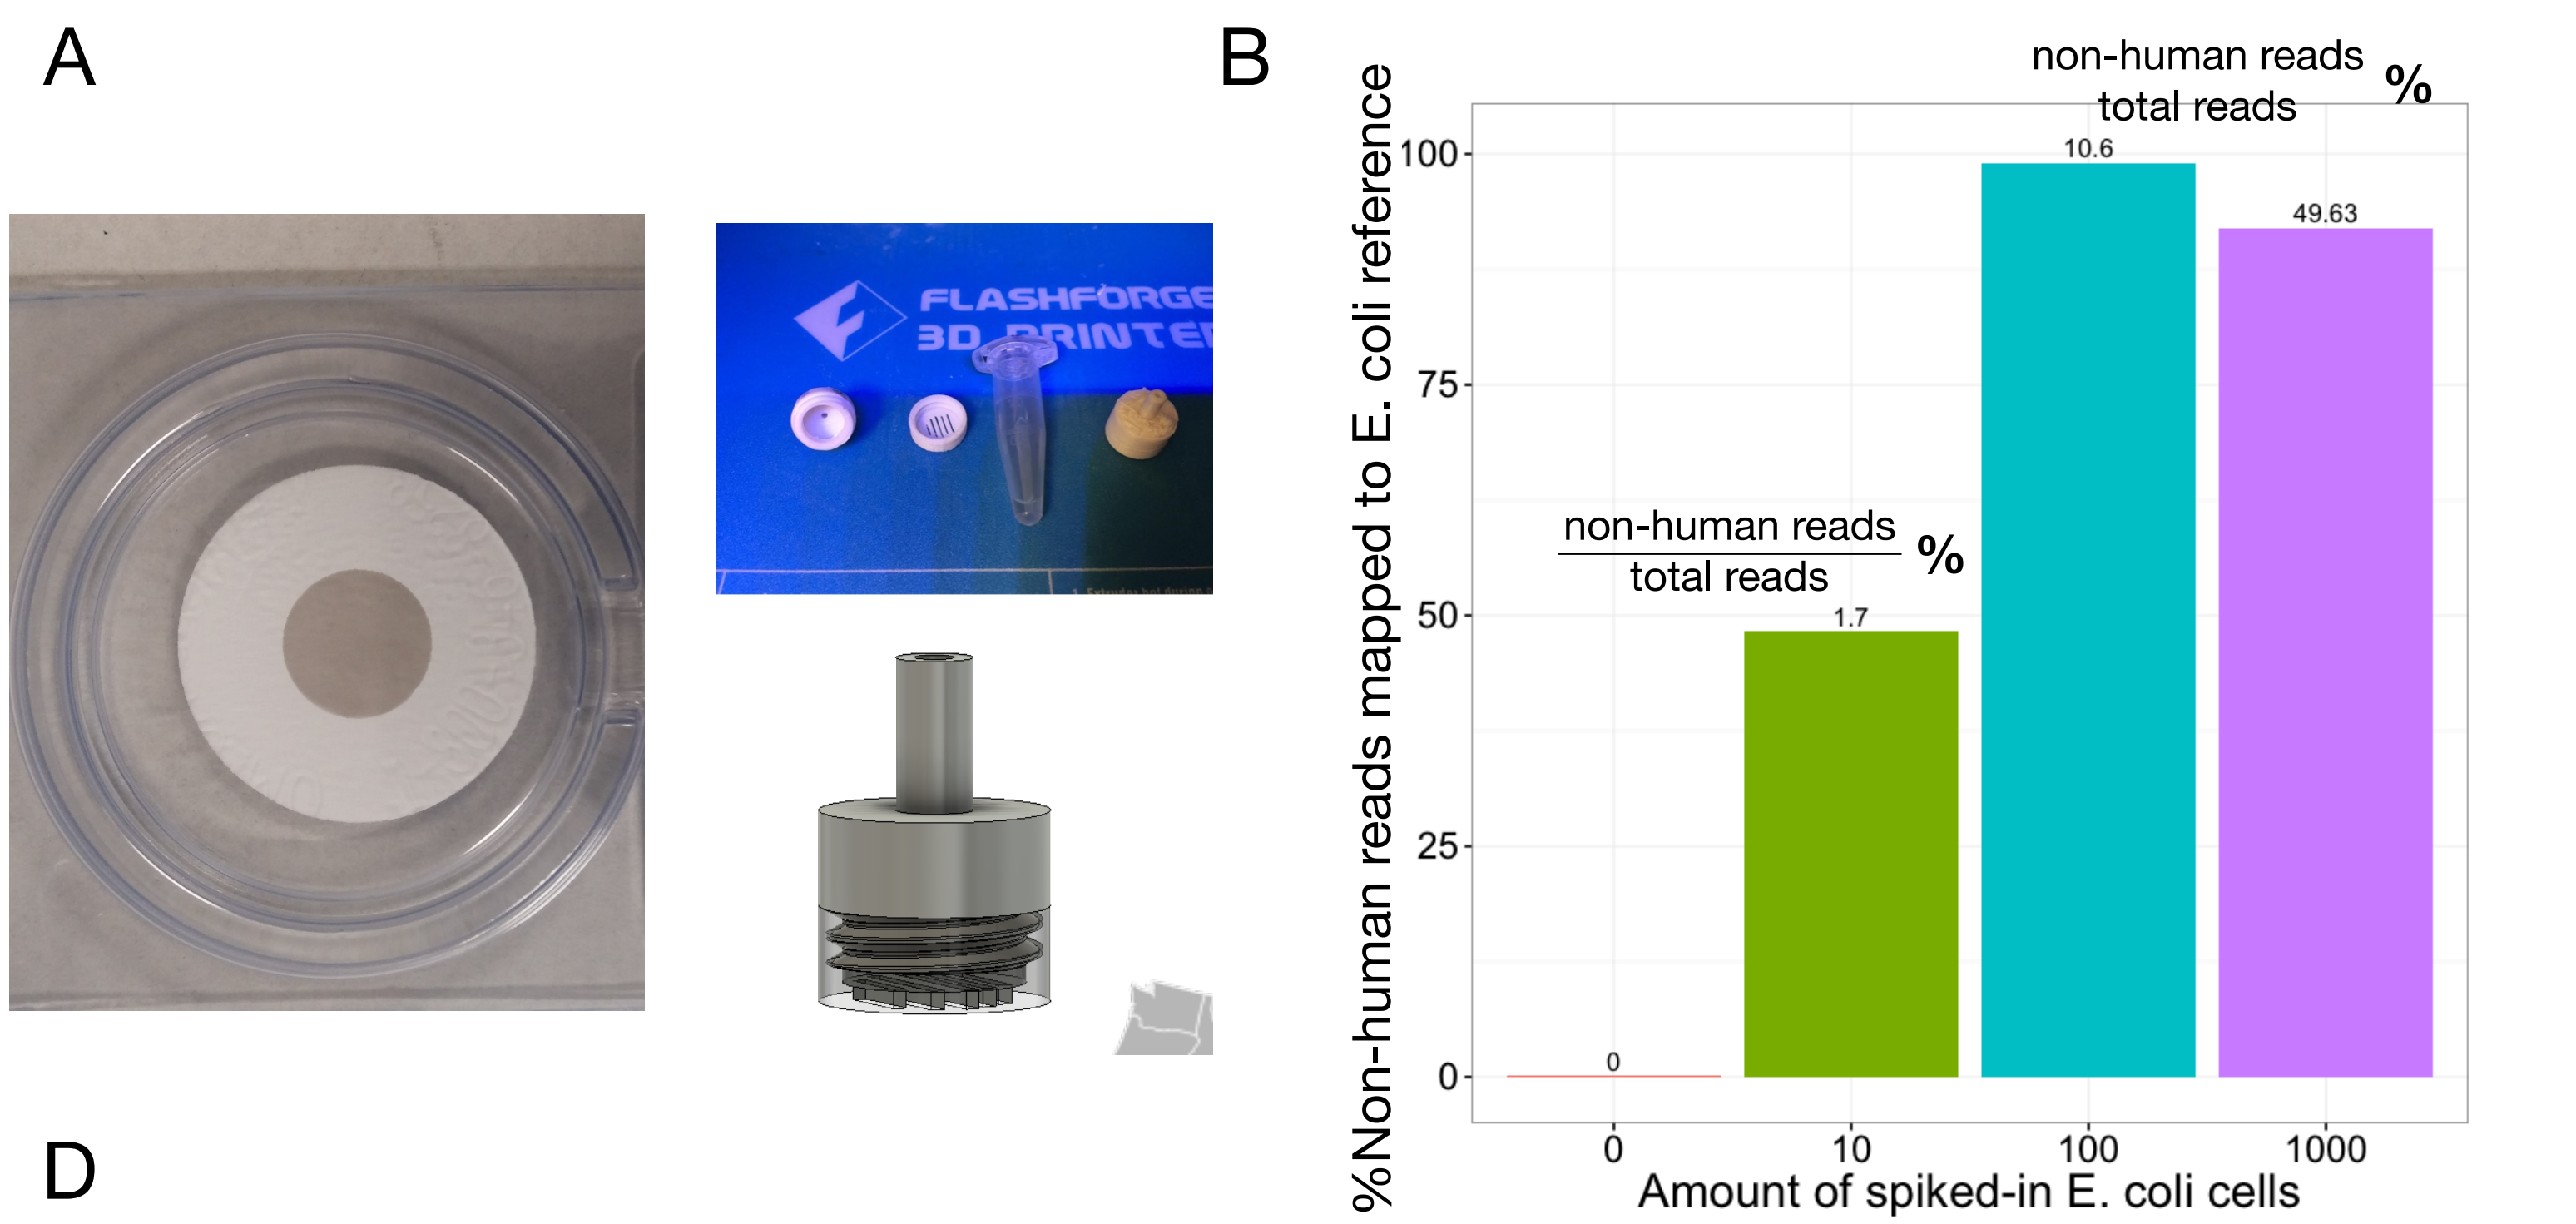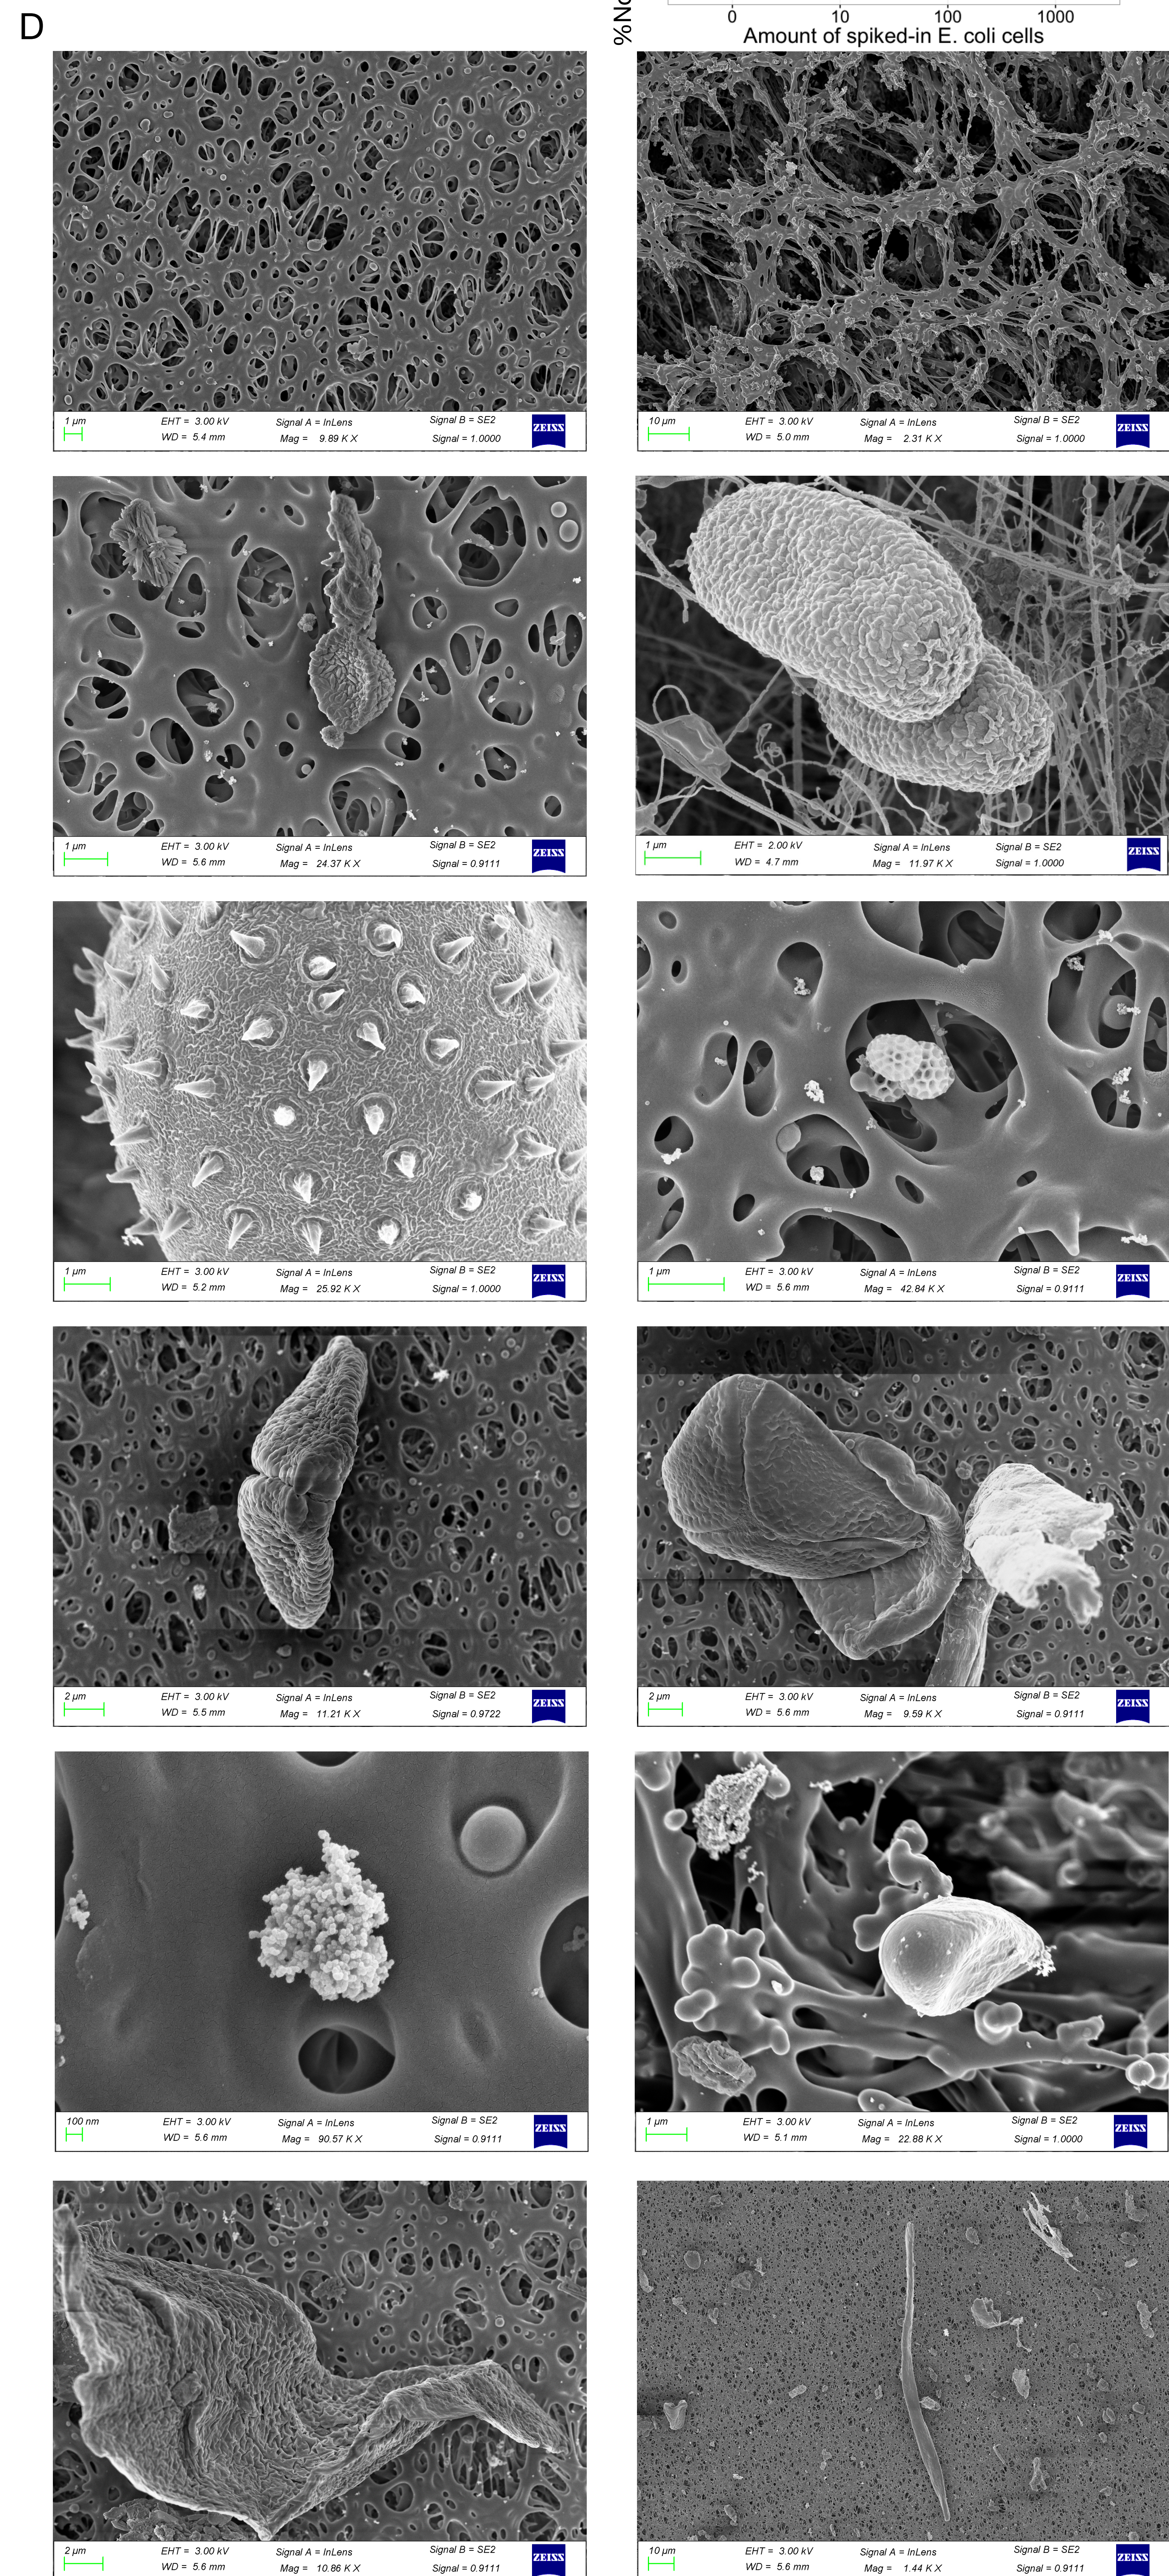

**C**

| Copies | Name                                 | Detection |
|--------|--------------------------------------|-----------|
| 200    | Human parainfluenza virus 3          | YES       |
| 200    | Rhinovirus 1A                        | YES       |
| 400    | Human metapneumovirus                | YES       |
| 400    | Betacoronavirus 1 (coronavirus OC43) | YES       |
| 400    | Enterovirus B                        | YES       |
| 1000   | Human respiratory syncytial virus    | YES       |
| 1000   | Coronavirus 229E (alphacoronavirus)  | YES       |
| 1000   | Human parainfluenza virus 2          | YES       |
| 1000   | Influenza B virus                    | YES       |
| 1400   | Influenza A virus                    | YES       |
| 10000  | Human immunodeficiency virus 1       | YES       |
| 10000  | Cowpea mosaic virus                  | YES       |

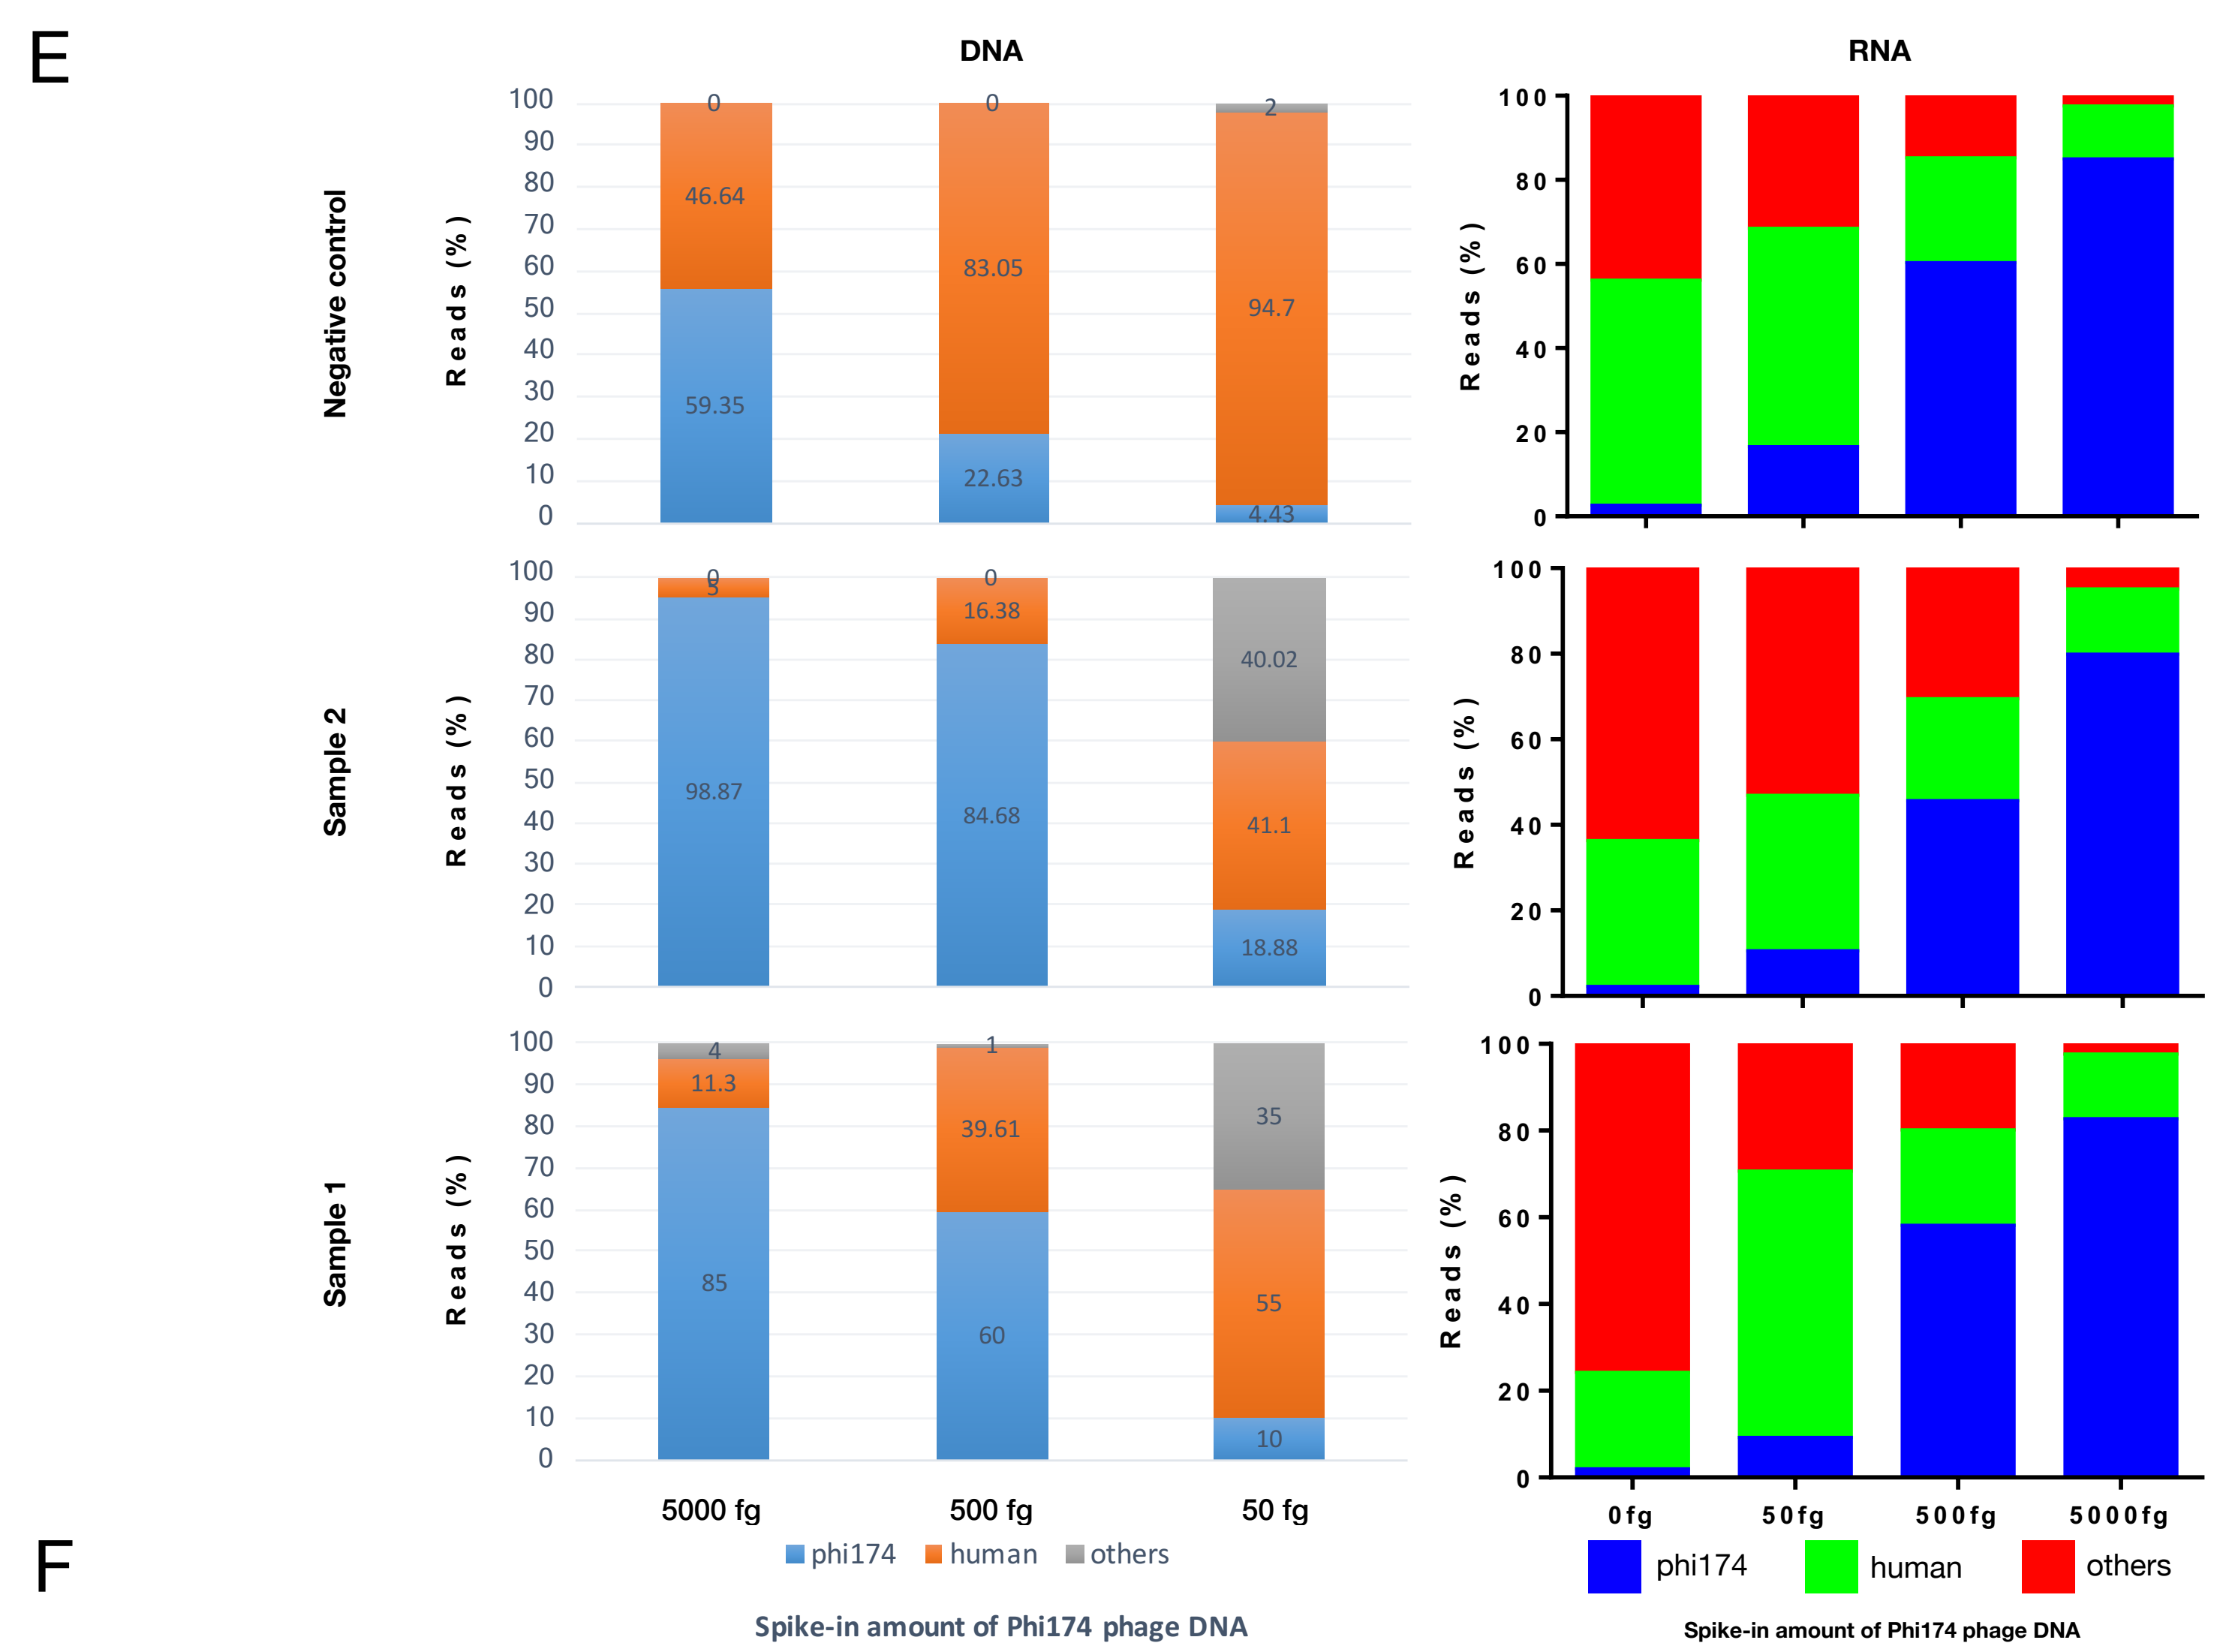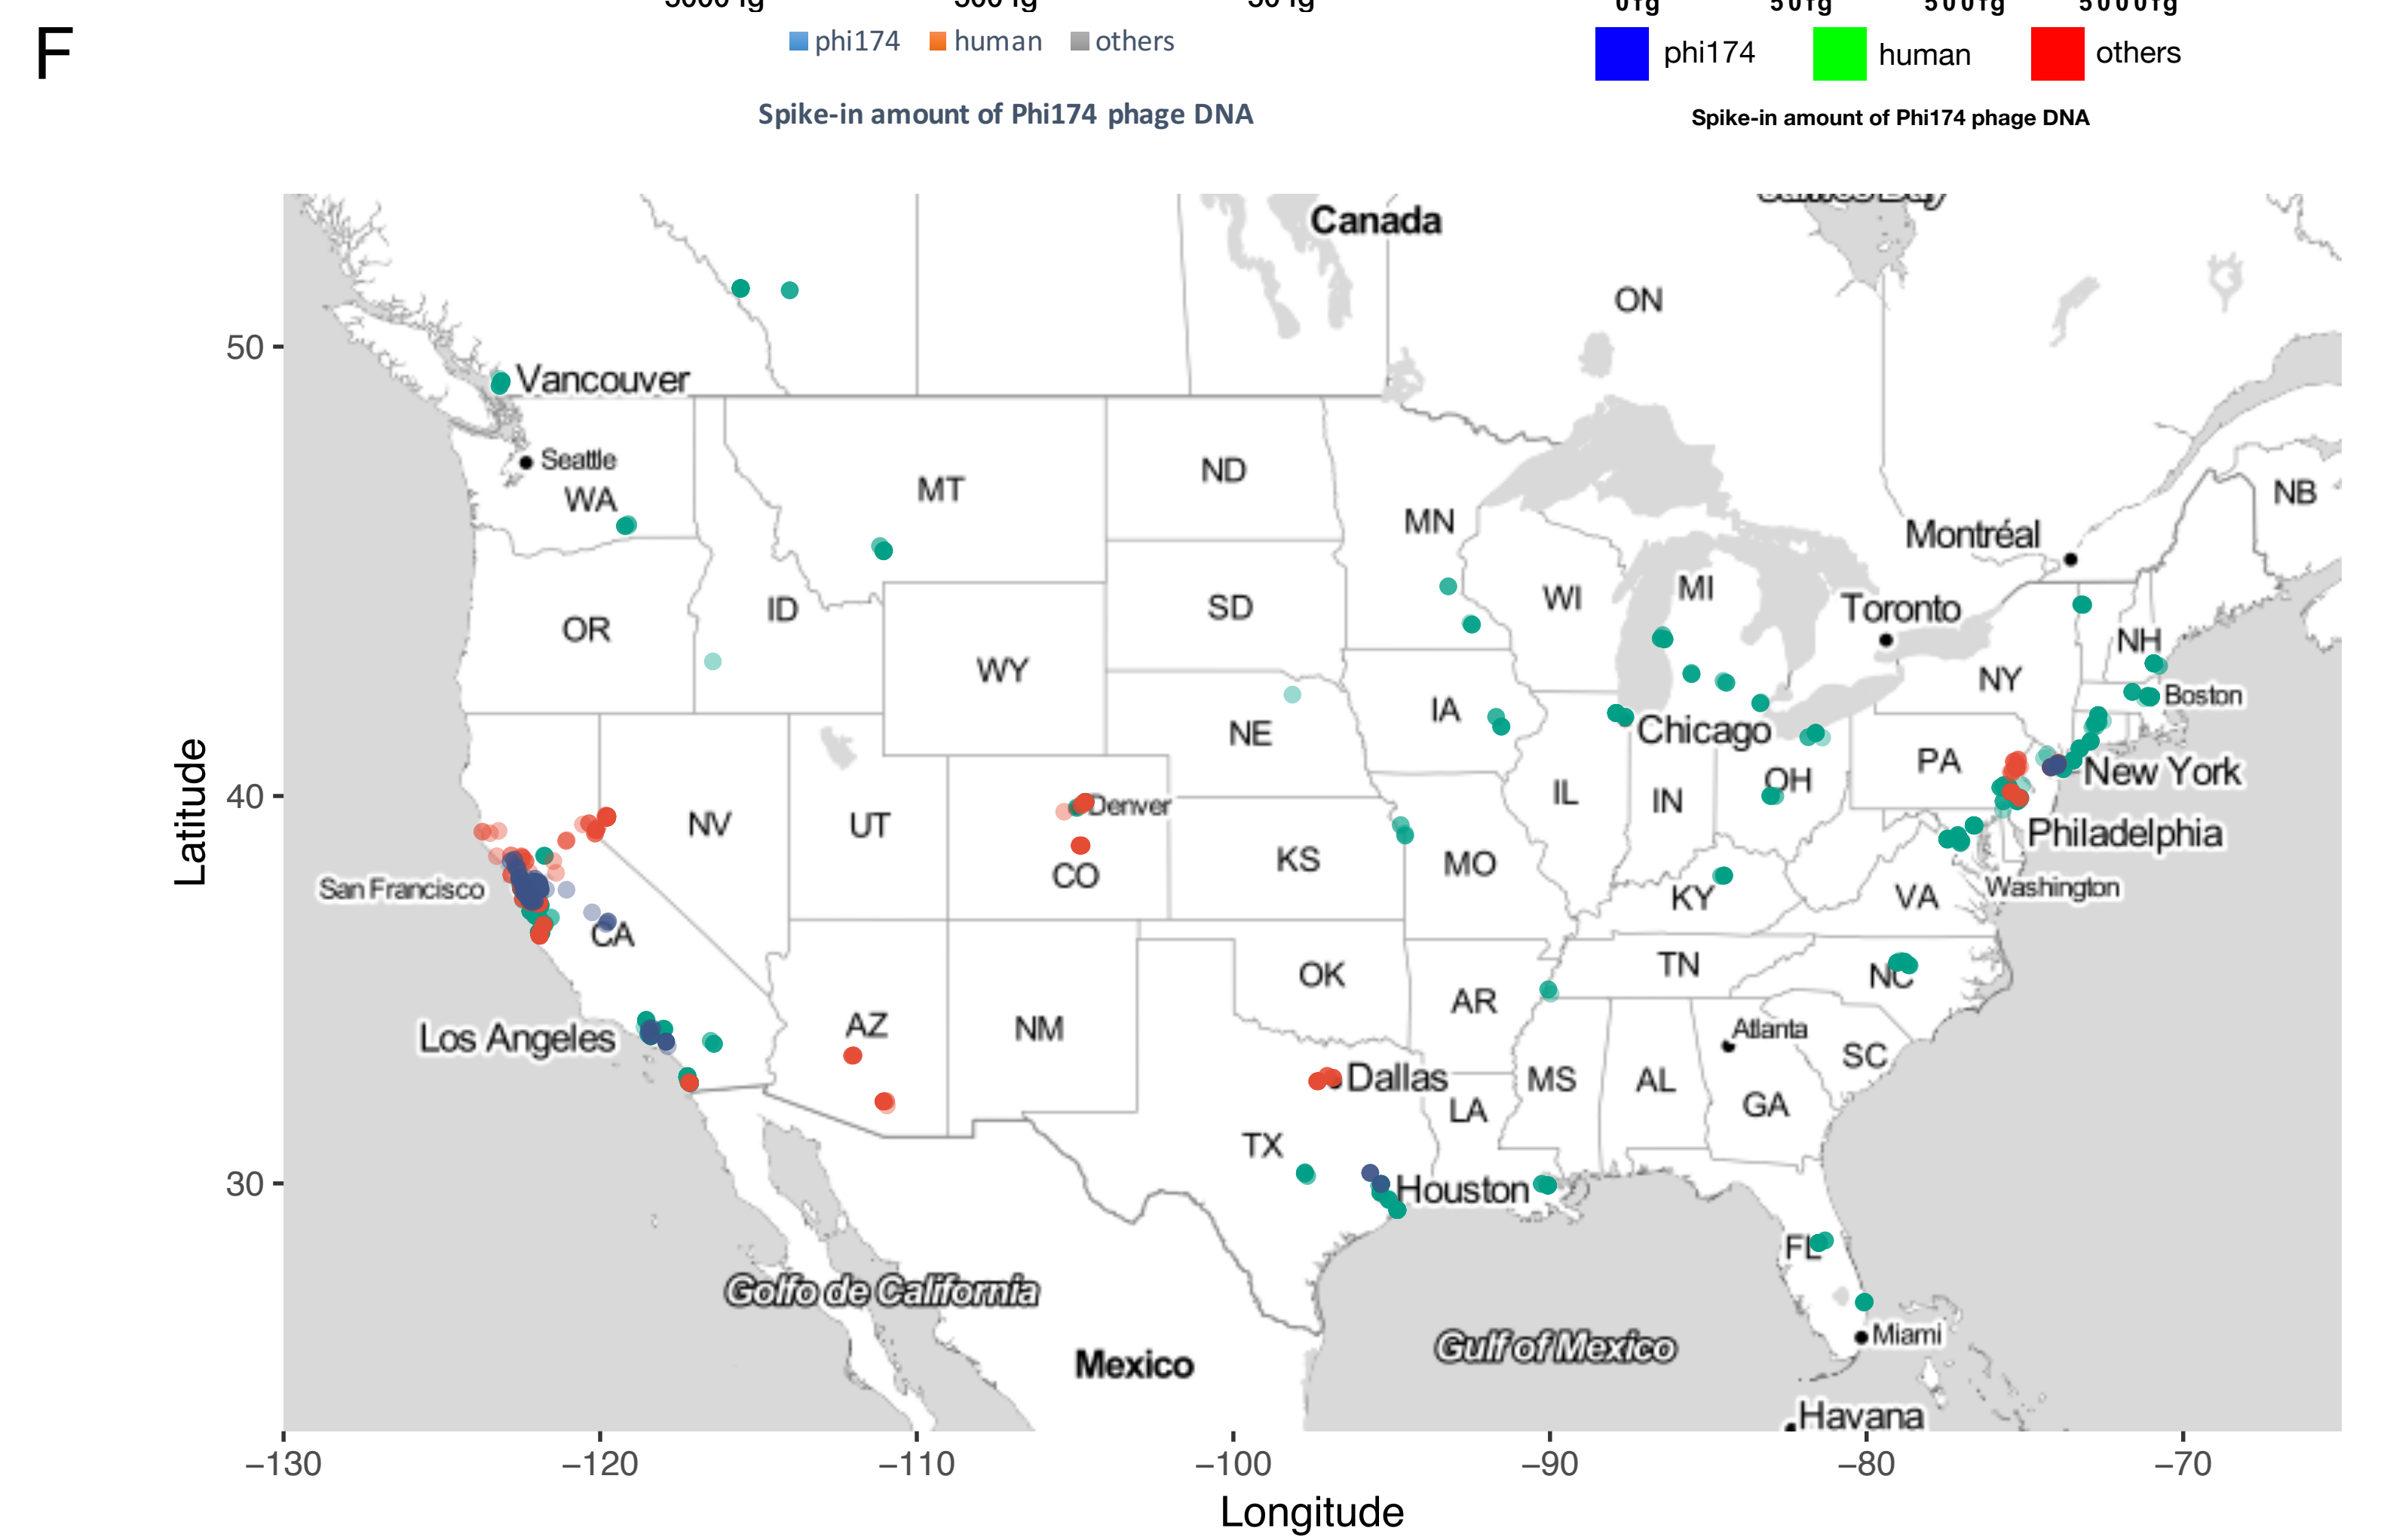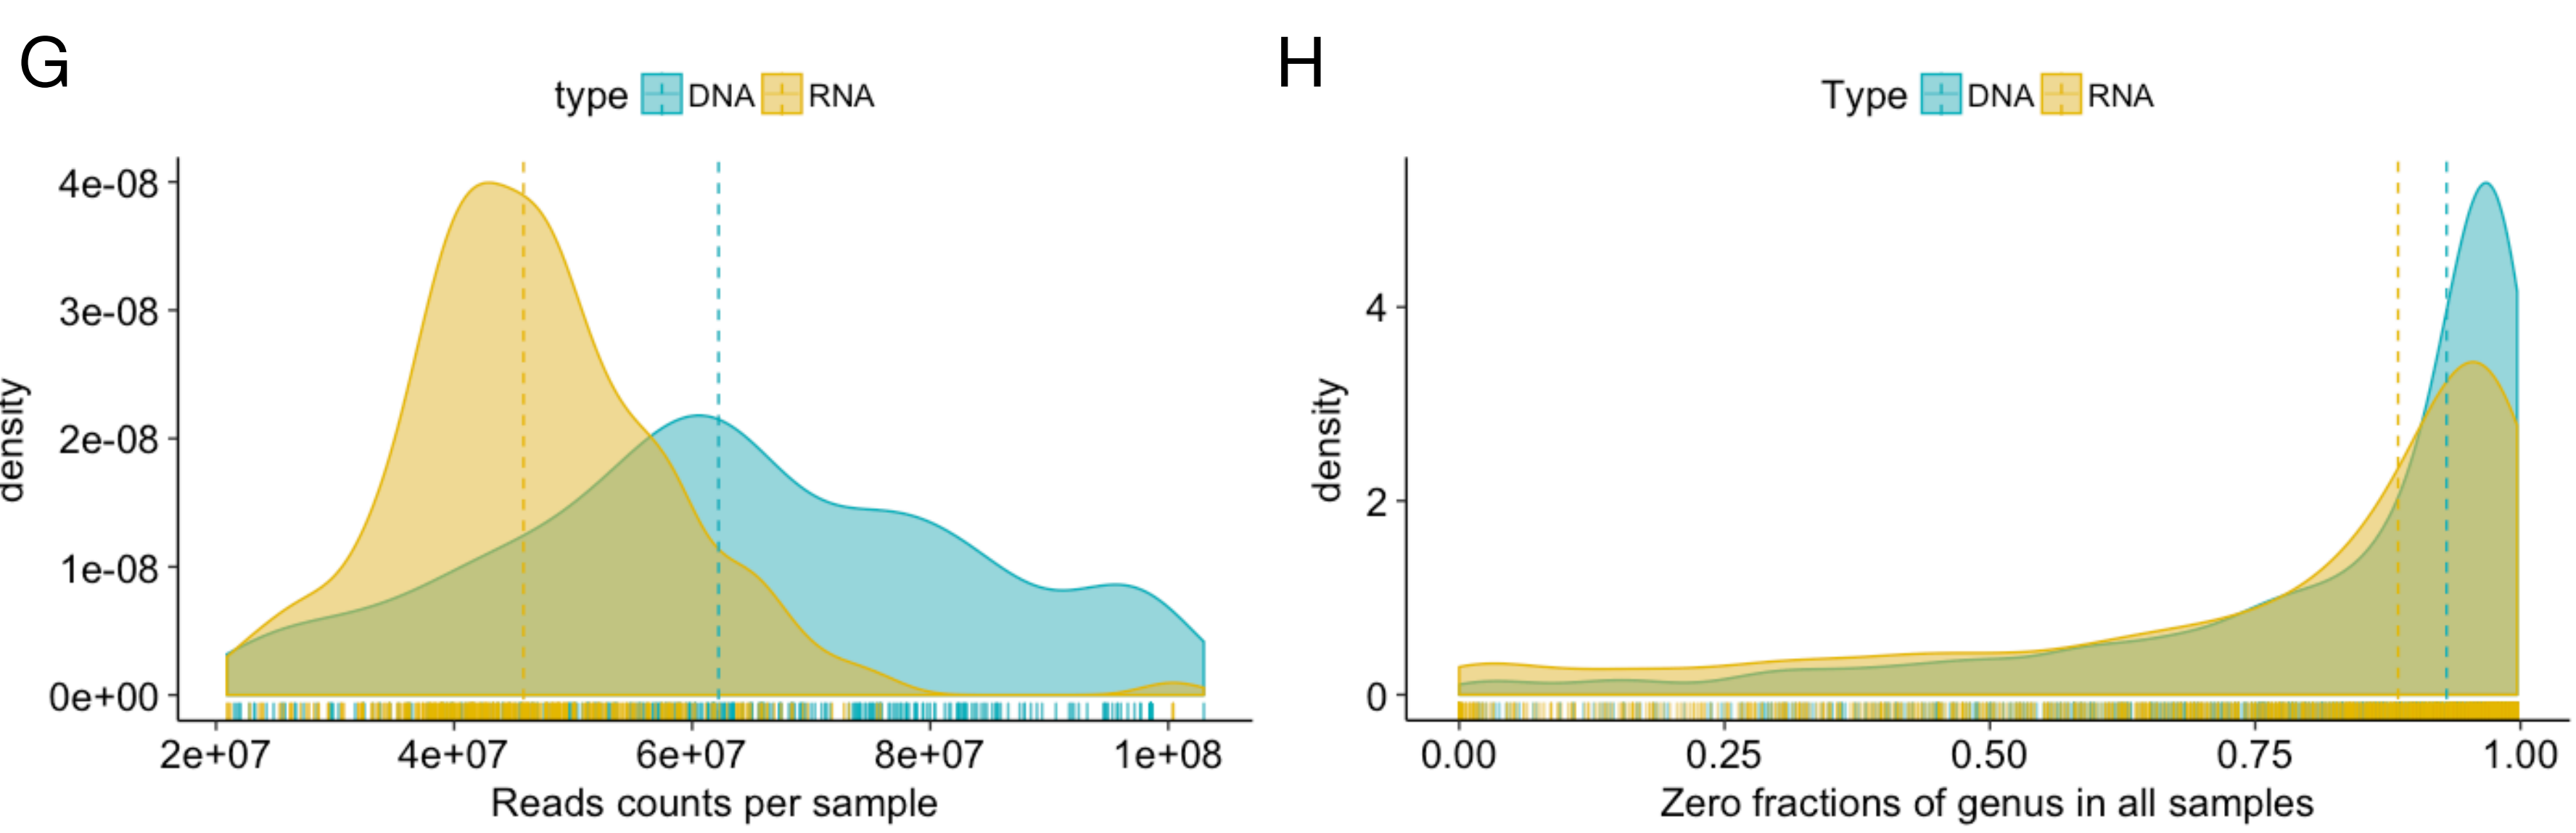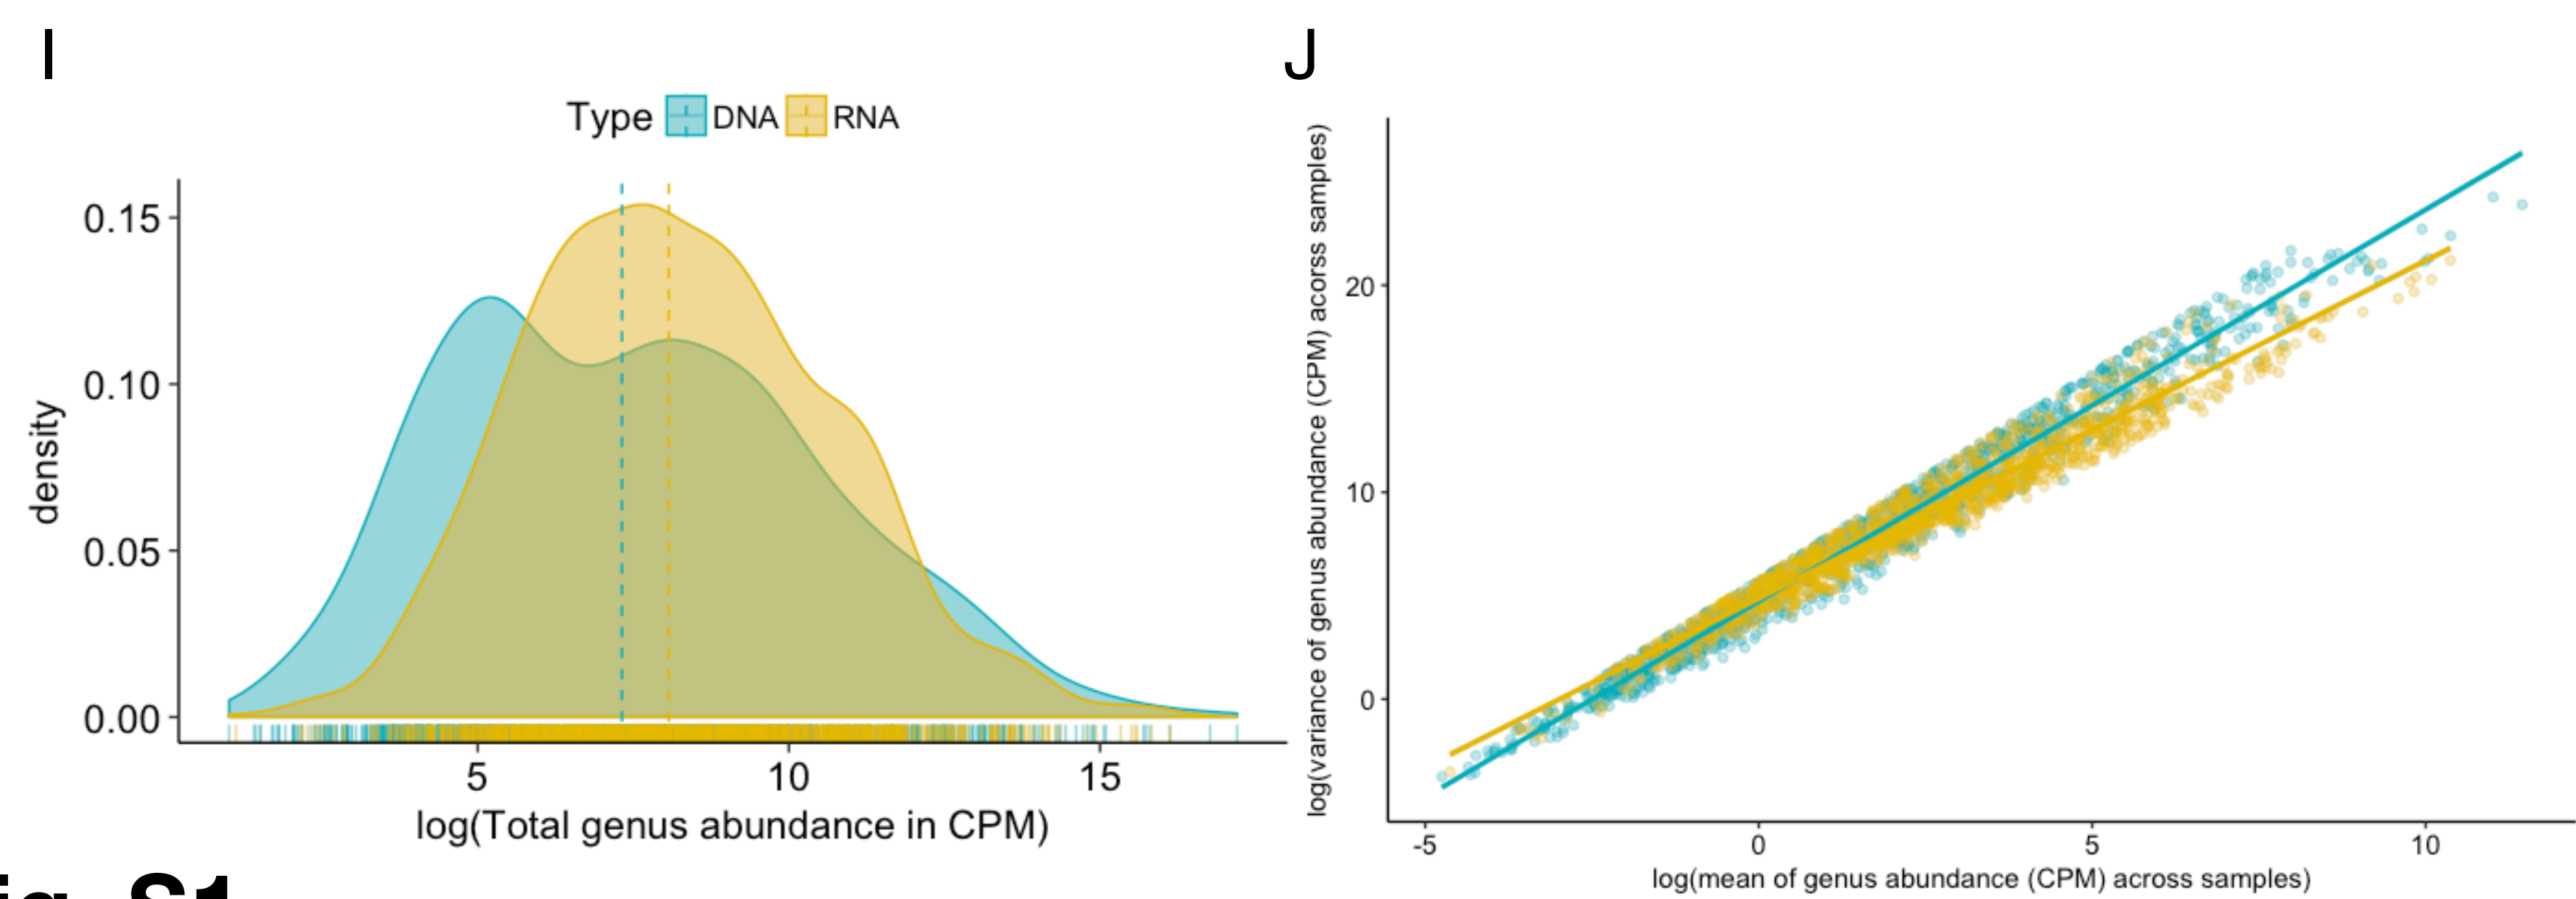

**Fig. S1**
