# Supplementary material
Source: PubMed Central journal article supplement (PMC6472932)
Supplement: NIHMS1507935-supplement-9.pdf [file NIHMS1507935-supplement-9.pdf]

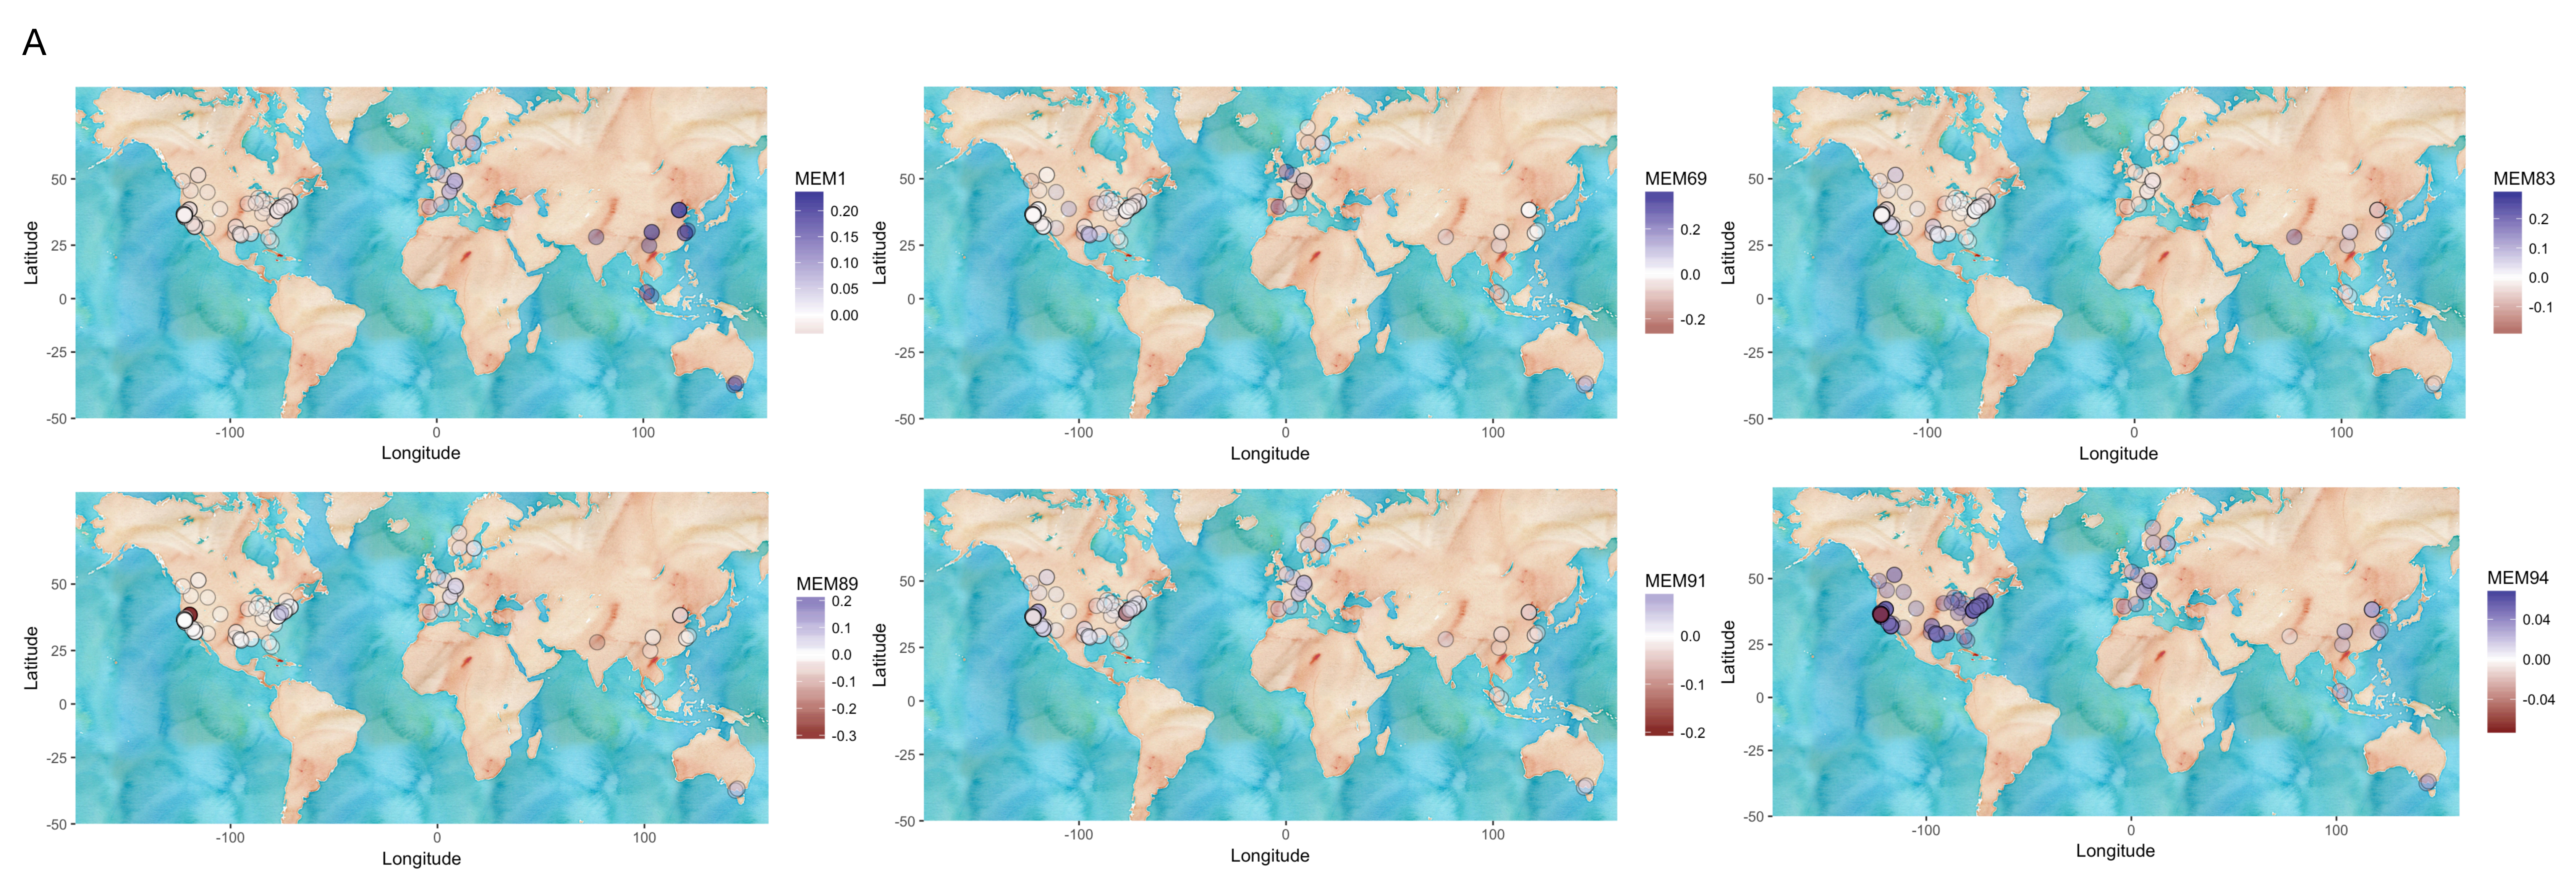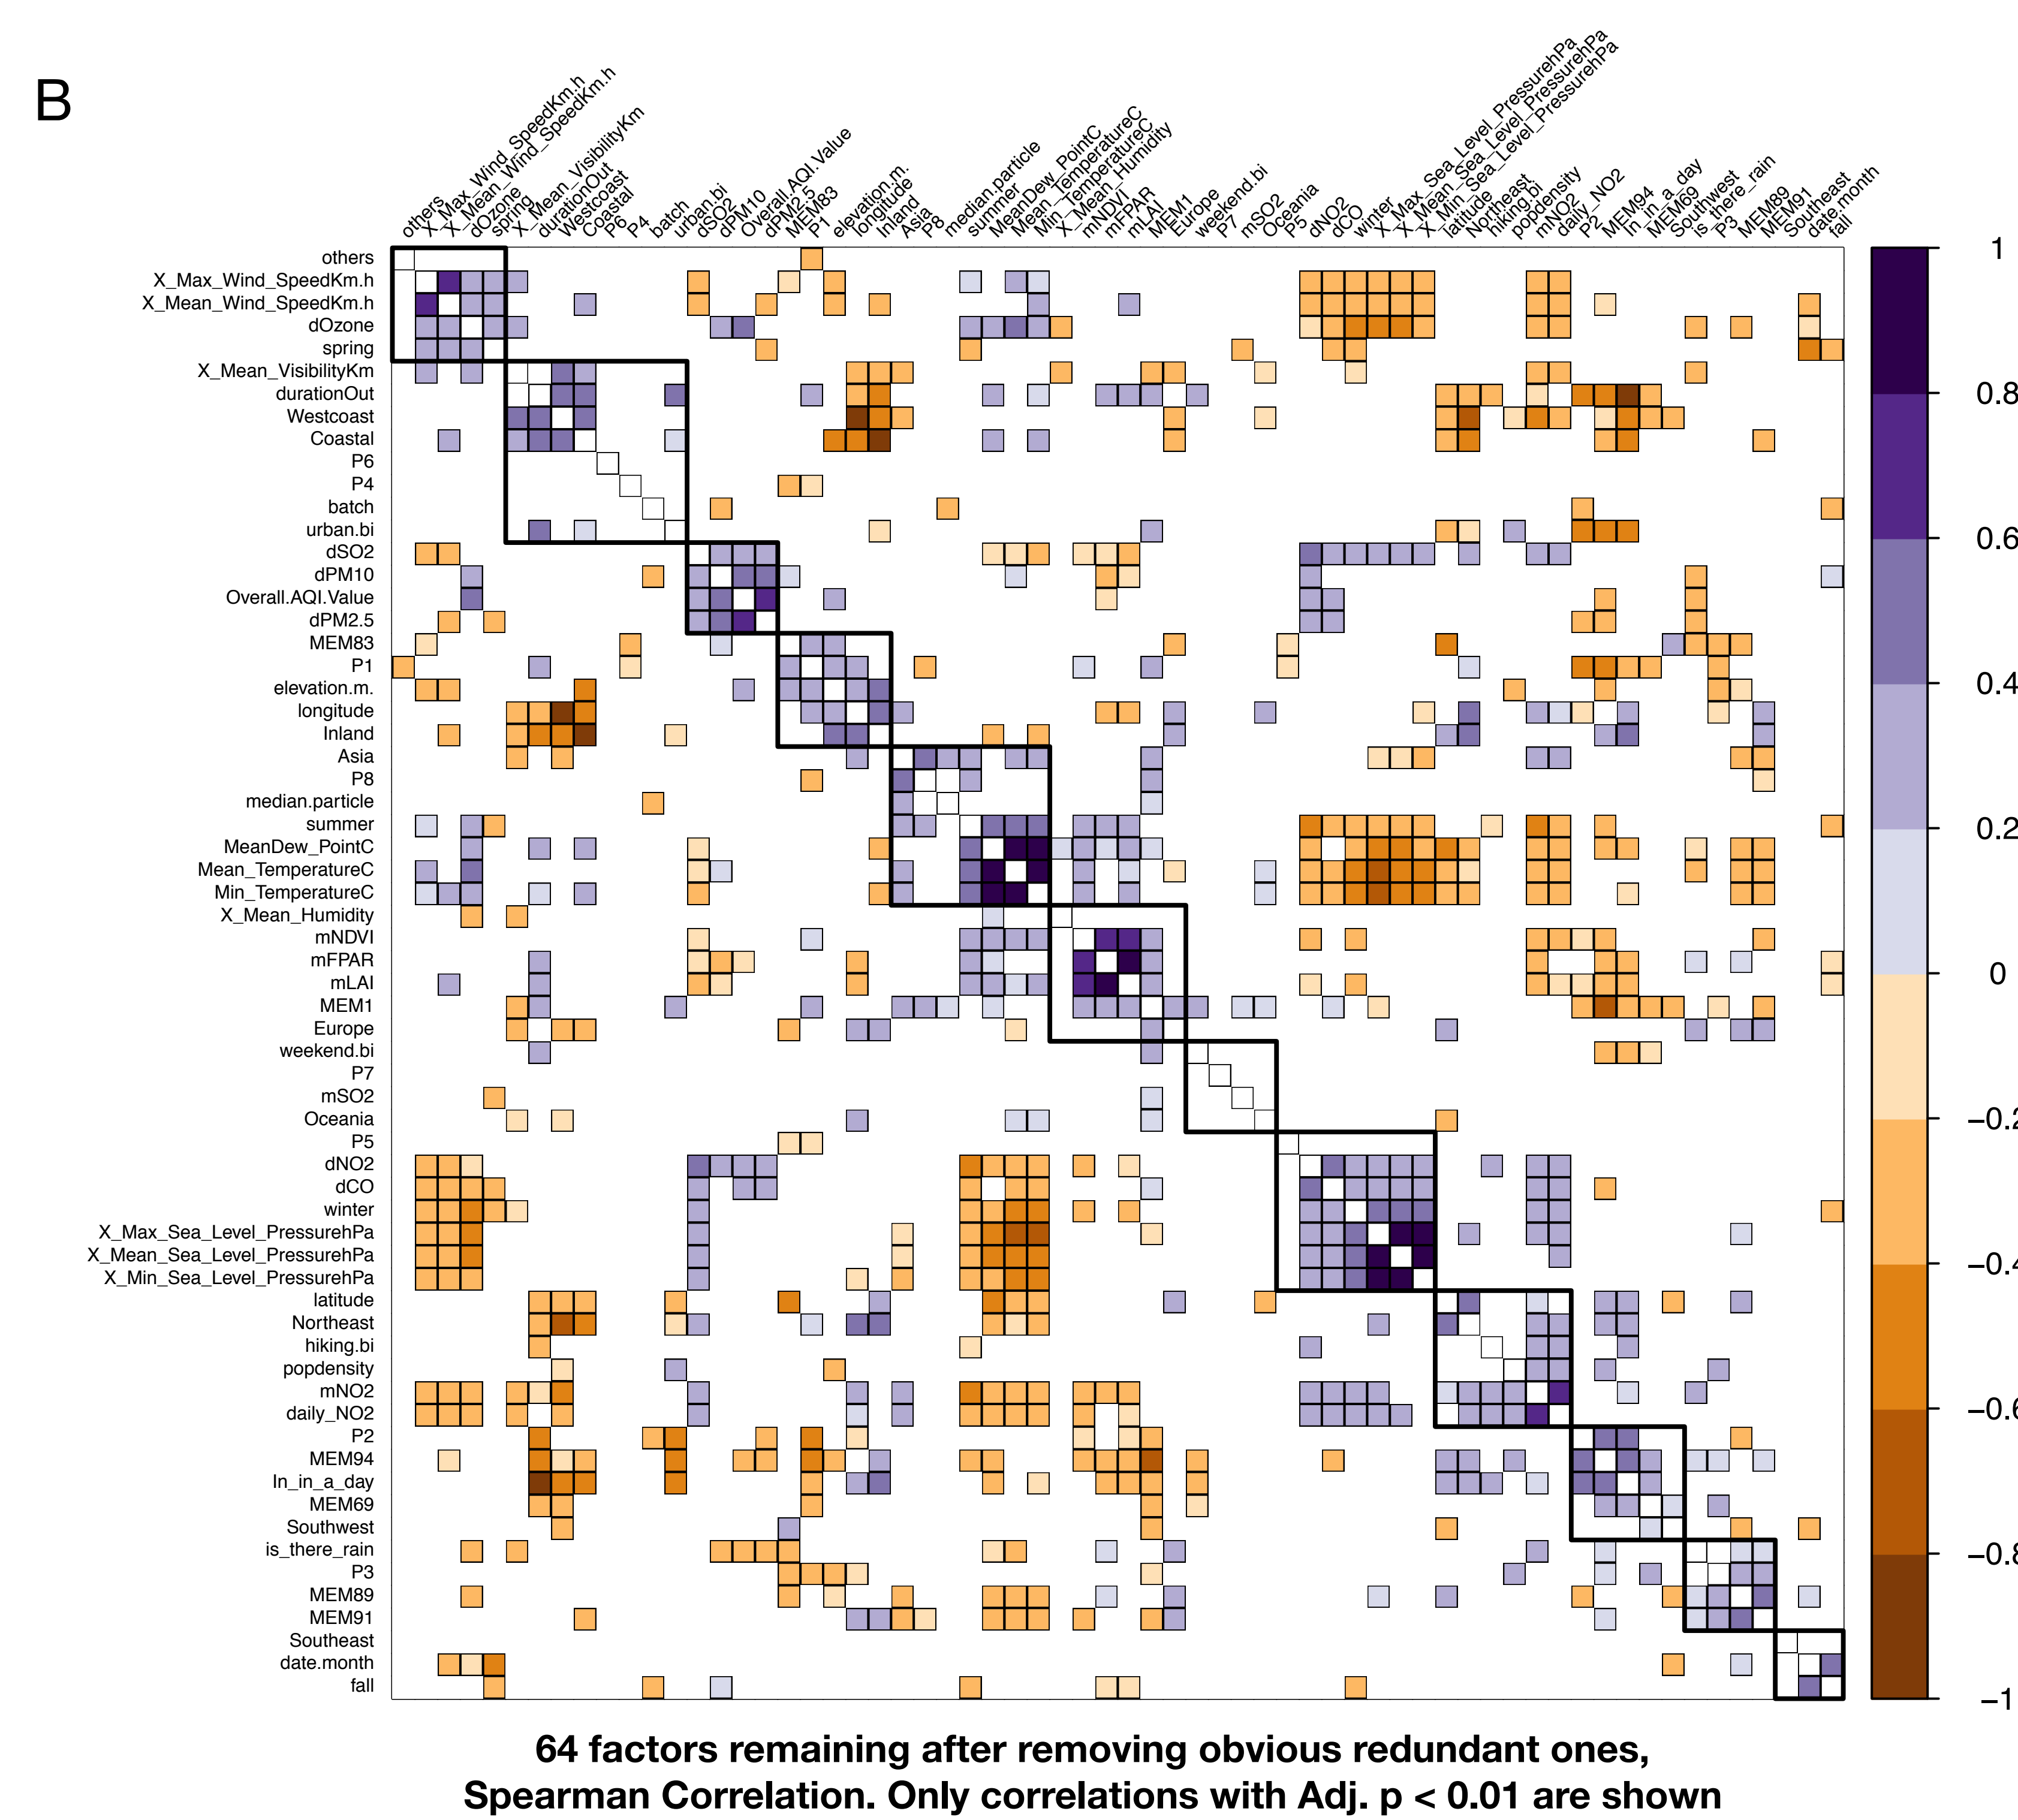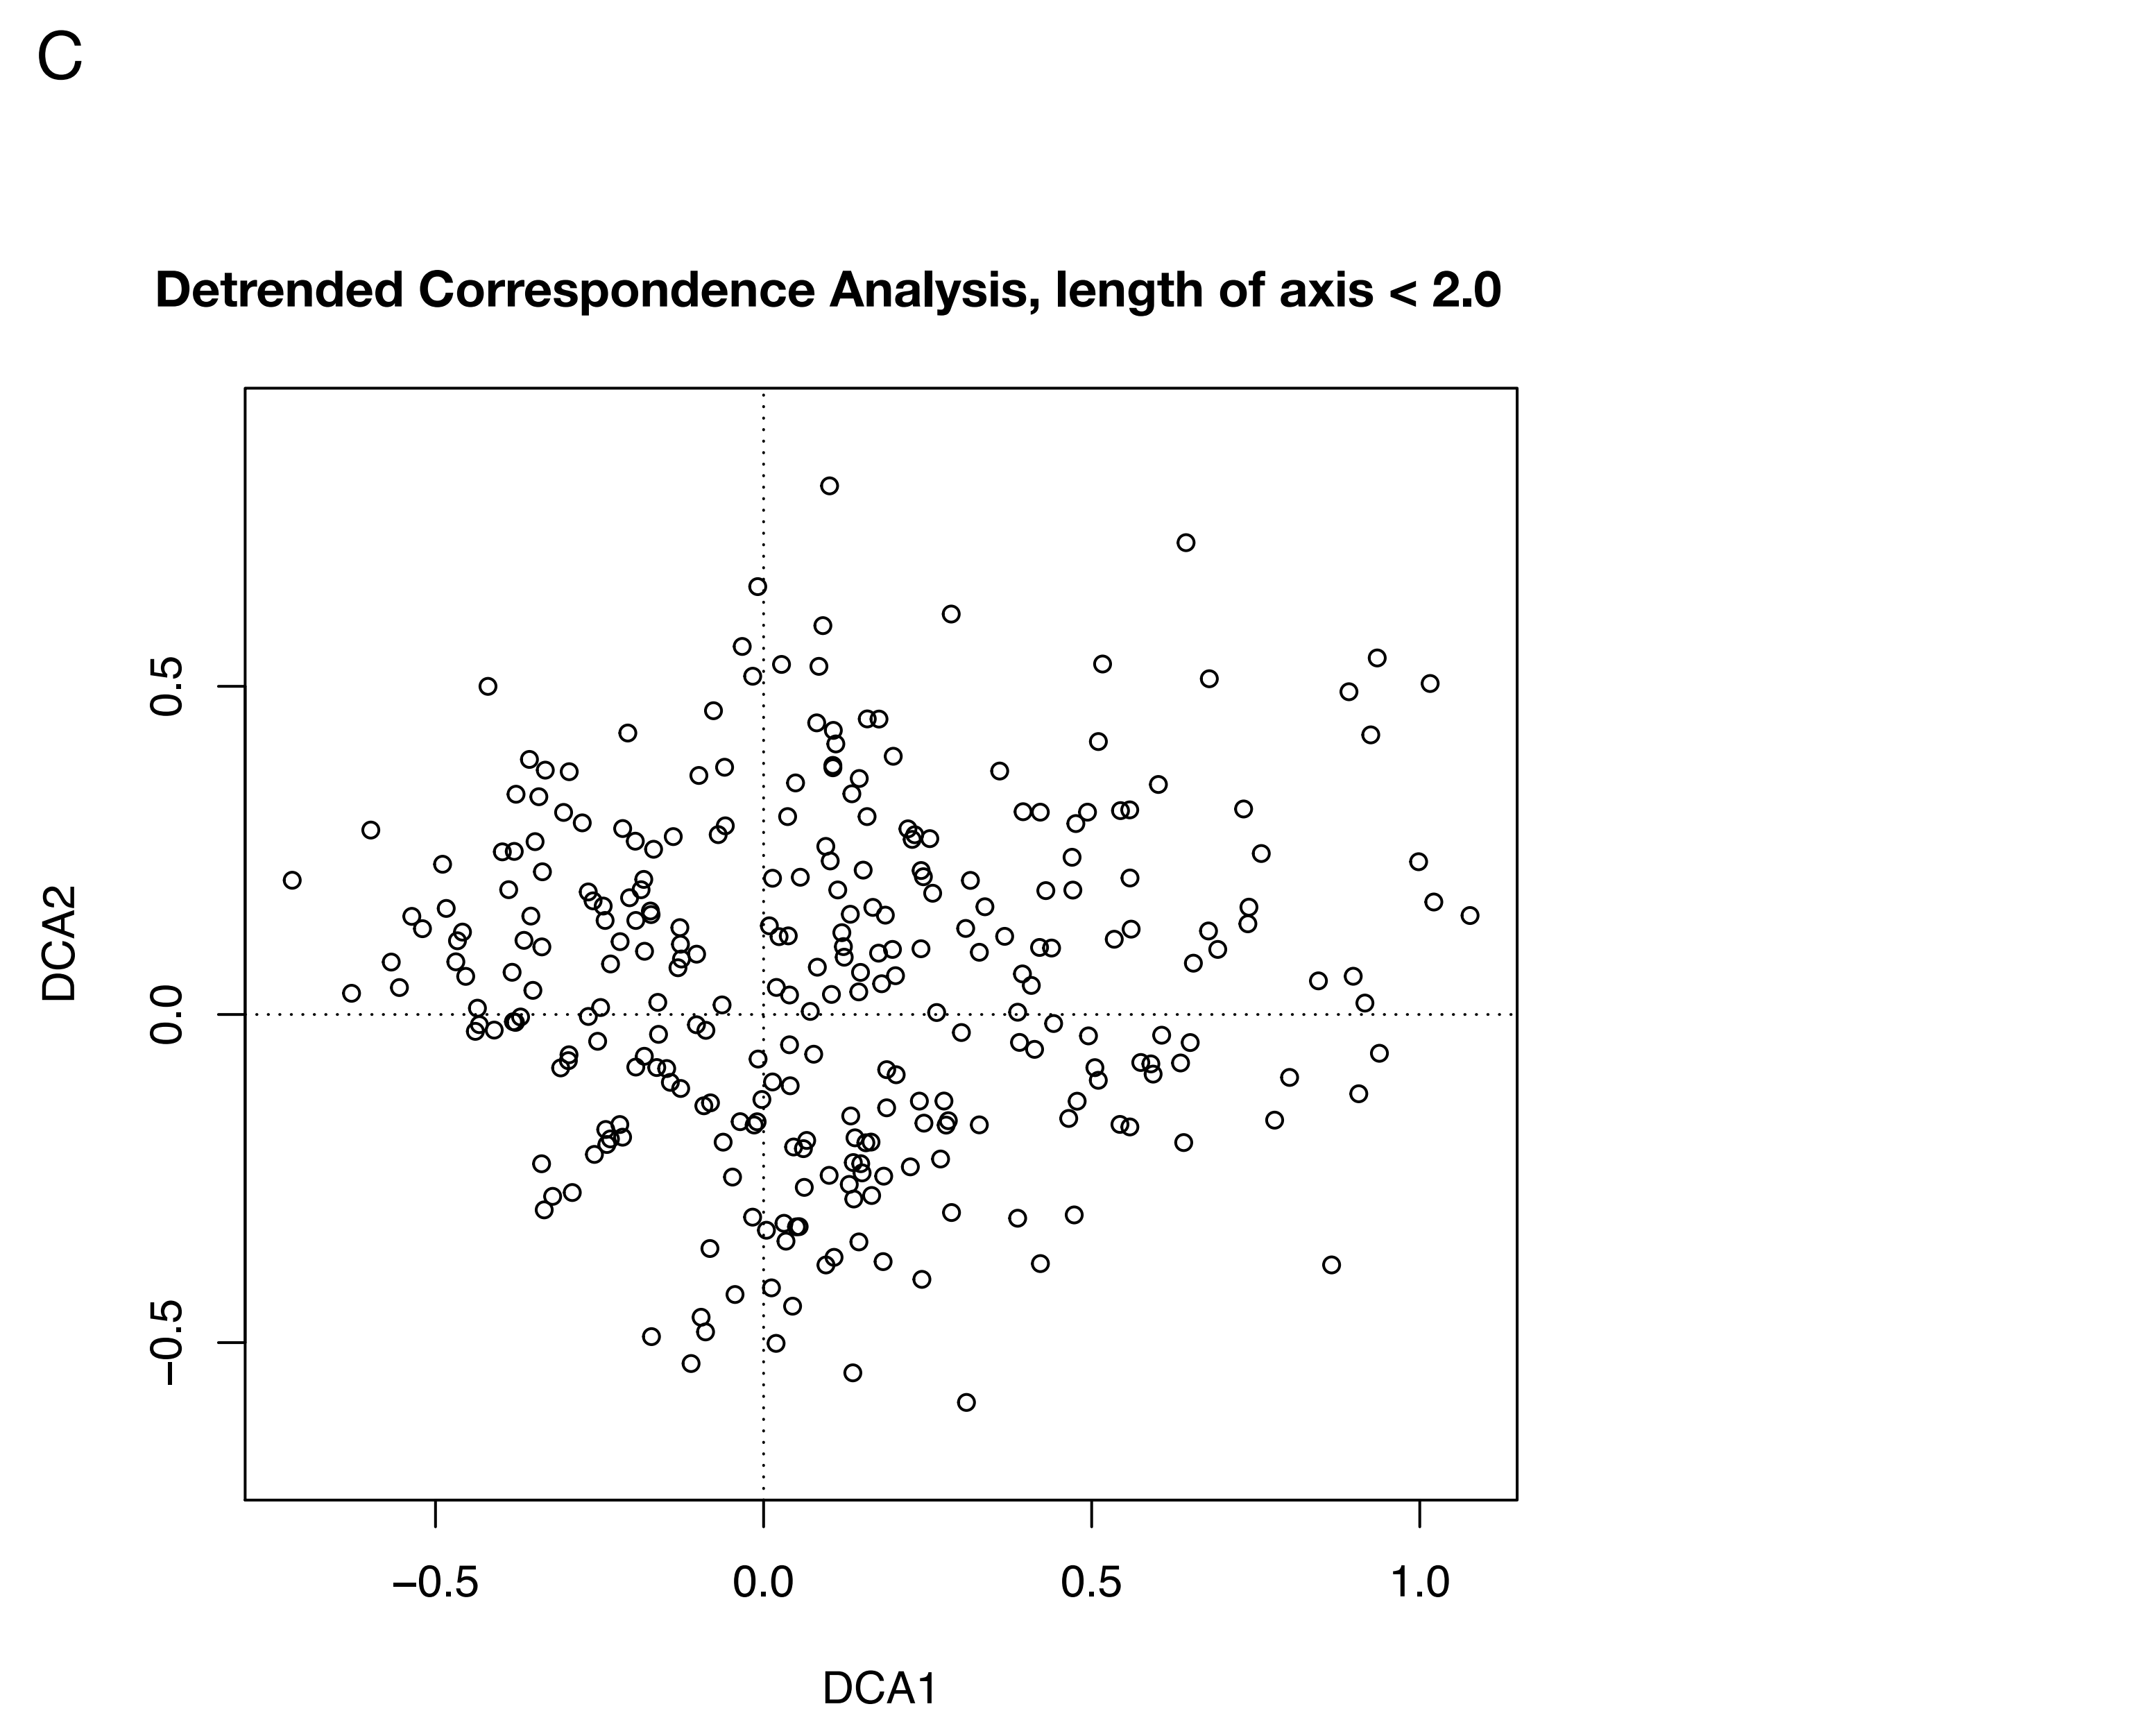

**D**

adonis analysis on forward-selected factors

Number of permutations: 1999  
Terms added sequentially (first to last)

|                     | Df  | SumsOfSqs | MeanSq | F.Model | R2    | Pr(>F)          |
|---------------------|-----|-----------|--------|---------|-------|-----------------|
| Mean_TemperatureC   | 1   | 0.905     | 0.905  | 5.548   | 0.017 | <b>5.00E-04</b> |
| mFPAR               | 1   | 0.889     | 0.889  | 5.446   | 0.017 | <b>5.00E-04</b> |
| mNO2                | 1   | 0.629     | 0.629  | 3.852   | 0.012 | <b>5.00E-04</b> |
| spring              | 1   | 0.532     | 0.532  | 3.257   | 0.010 | <b>5.00E-04</b> |
| Overall.AQI.Value   | 1   | 0.482     | 0.482  | 2.953   | 0.009 | <b>5.00E-04</b> |
| summer              | 1   | 0.421     | 0.421  | 2.580   | 0.008 | <b>0.001</b>    |
| X_Mean_VisibilityKm | 1   | 0.358     | 0.358  | 2.193   | 0.007 | <b>0.0035</b>   |
| winter              | 1   | 0.333     | 0.333  | 2.042   | 0.006 | <b>0.0085</b>   |
| mLAI                | 1   | 0.287     | 0.287  | 1.756   | 0.005 | <b>0.0165</b>   |
| date.month          | 1   | 0.253     | 0.253  | 1.551   | 0.005 | <b>0.034</b>    |
| longitude           | 1   | 0.335     | 0.335  | 2.050   | 0.006 | <b>0.0055</b>   |
| MEM1                | 1   | 0.498     | 0.498  | 3.050   | 0.010 | <b>5.00E-04</b> |
| MEM91               | 1   | 0.484     | 0.484  | 2.965   | 0.009 | <b>5.00E-04</b> |
| MEM39               | 1   | 0.282     | 0.282  | 1.730   | 0.005 | <b>0.0185</b>   |
| MEM83               | 1   | 0.286     | 0.286  | 1.750   | 0.005 | <b>0.0185</b>   |
| popdensity          | 1   | 0.251     | 0.251  | 1.535   | 0.005 | <b>0.0435</b>   |
| MEM69               | 1   | 0.331     | 0.331  | 2.029   | 0.006 | <b>0.0025</b>   |
| urban.bi            | 1   | 0.295     | 0.295  | 1.810   | 0.006 | <b>0.0135</b>   |
| Westcoast           | 1   | 0.258     | 0.258  | 1.580   | 0.005 | <b>0.028</b>    |
| Europe              | 1   | 0.187     | 0.187  | 1.148   | 0.004 | 0.2025          |
| In_in_a_day         | 1   | 0.236     | 0.236  | 1.449   | 0.005 | 0.0505          |
| P2                  | 1   | 0.389     | 0.389  | 2.381   | 0.007 | <b>0.0025</b>   |
| P8                  | 1   | 0.228     | 0.228  | 1.397   | 0.004 | 0.0695          |
| P5                  | 1   | 0.161     | 0.161  | 0.985   | 0.003 | 0.4215          |
| others              | 1   | 0.211     | 0.211  | 1.295   | 0.004 | 0.1145          |
| P1                  | 1   | 0.194     | 0.194  | 1.191   | 0.004 | 0.166           |
| P7                  | 1   | 0.246     | 0.246  | 1.507   | 0.005 | 0.0515          |
| batch               | 1   | 0.912     | 0.912  | 5.587   | 0.017 | <b>5.00E-04</b> |
| Residuals           | 254 | 41.456    | 0.163  |         | 0.792 |                 |
| Total               | 282 | 52.329    |        |         | 1.000 |                 |

**E**

All samples on forward-selected factors

| Variation Partition Table | Df | R.square | Adj.R.square | Testable (significant) |
|---------------------------|----|----------|--------------|------------------------|
| Environmental Factors     | 10 | 0.0972   | 0.0641       | TRUE                   |
| Spatial/lifestyle factors | 17 | 0.1226   | 0.0663       | TRUE                   |
| Technical artifacts       | 1  | 0.0263   | 0.0228       | TRUE                   |
| All explained variation   | 28 | 0.20777  | 0.12044      | TRUE                   |

All samples on all factors

| Variation Partition Table | Df | R.square | Adj.R.square | Testable (significant) |
|---------------------------|----|----------|--------------|------------------------|
| Environmental Factors     | 29 | 0.1707   | 0.0757       | TRUE                   |
| Spatial/lifestyle factors | 29 | 0.1646   | 0.0688       | TRUE                   |
| Technical artifacts       | 1  | 0.0263   | 0.0228       | TRUE                   |
| All explained variation   | 59 | 0.3126   | 0.1307       | TRUE                   |

**Fig. S6**
