# Supplementary material
Source: PubMed Central journal article supplement (PMC6472932)

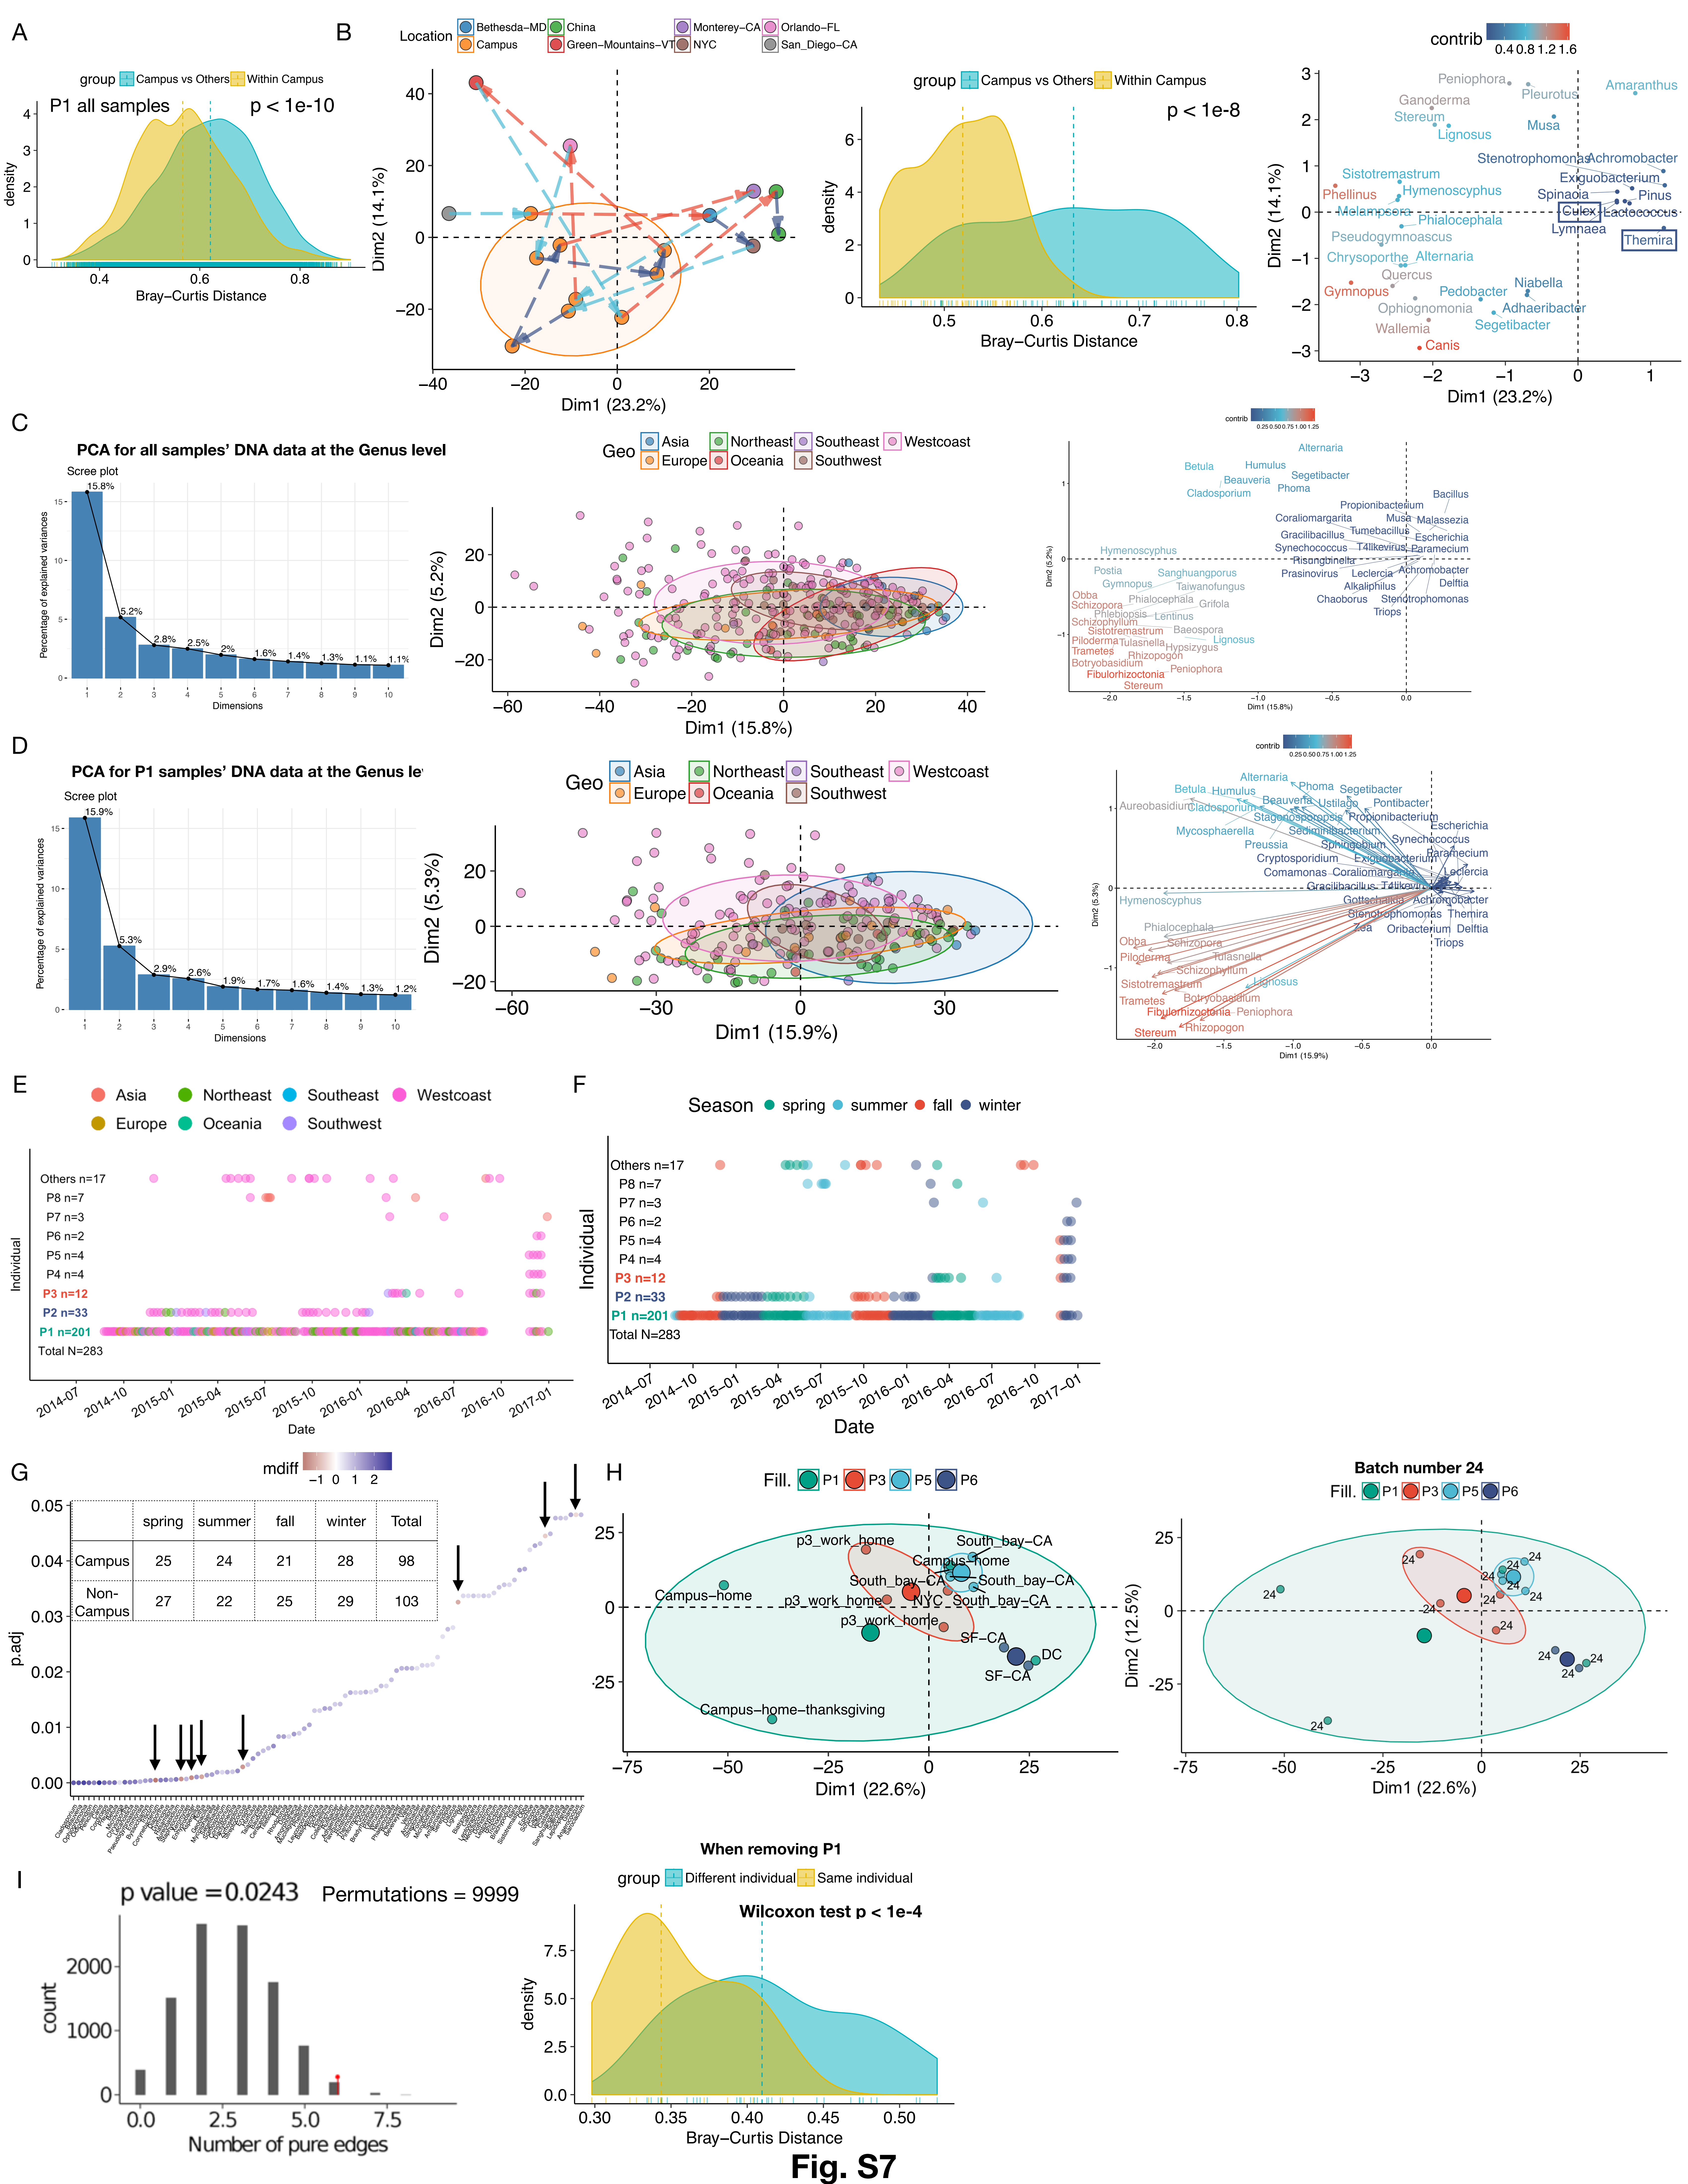

Supplement: NIHMS1507935-supplement-10.pdf [file NIHMS1507935-supplement-10.pdf]

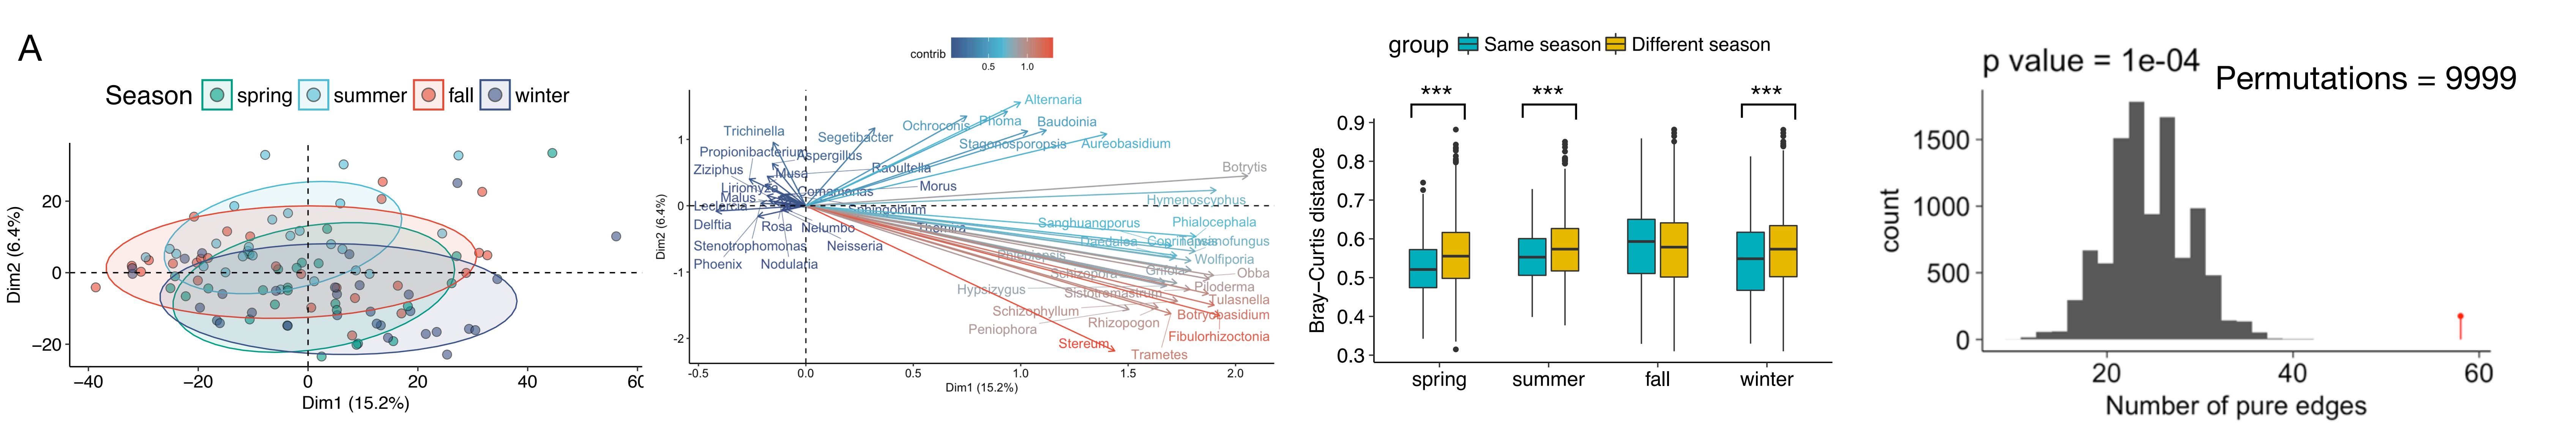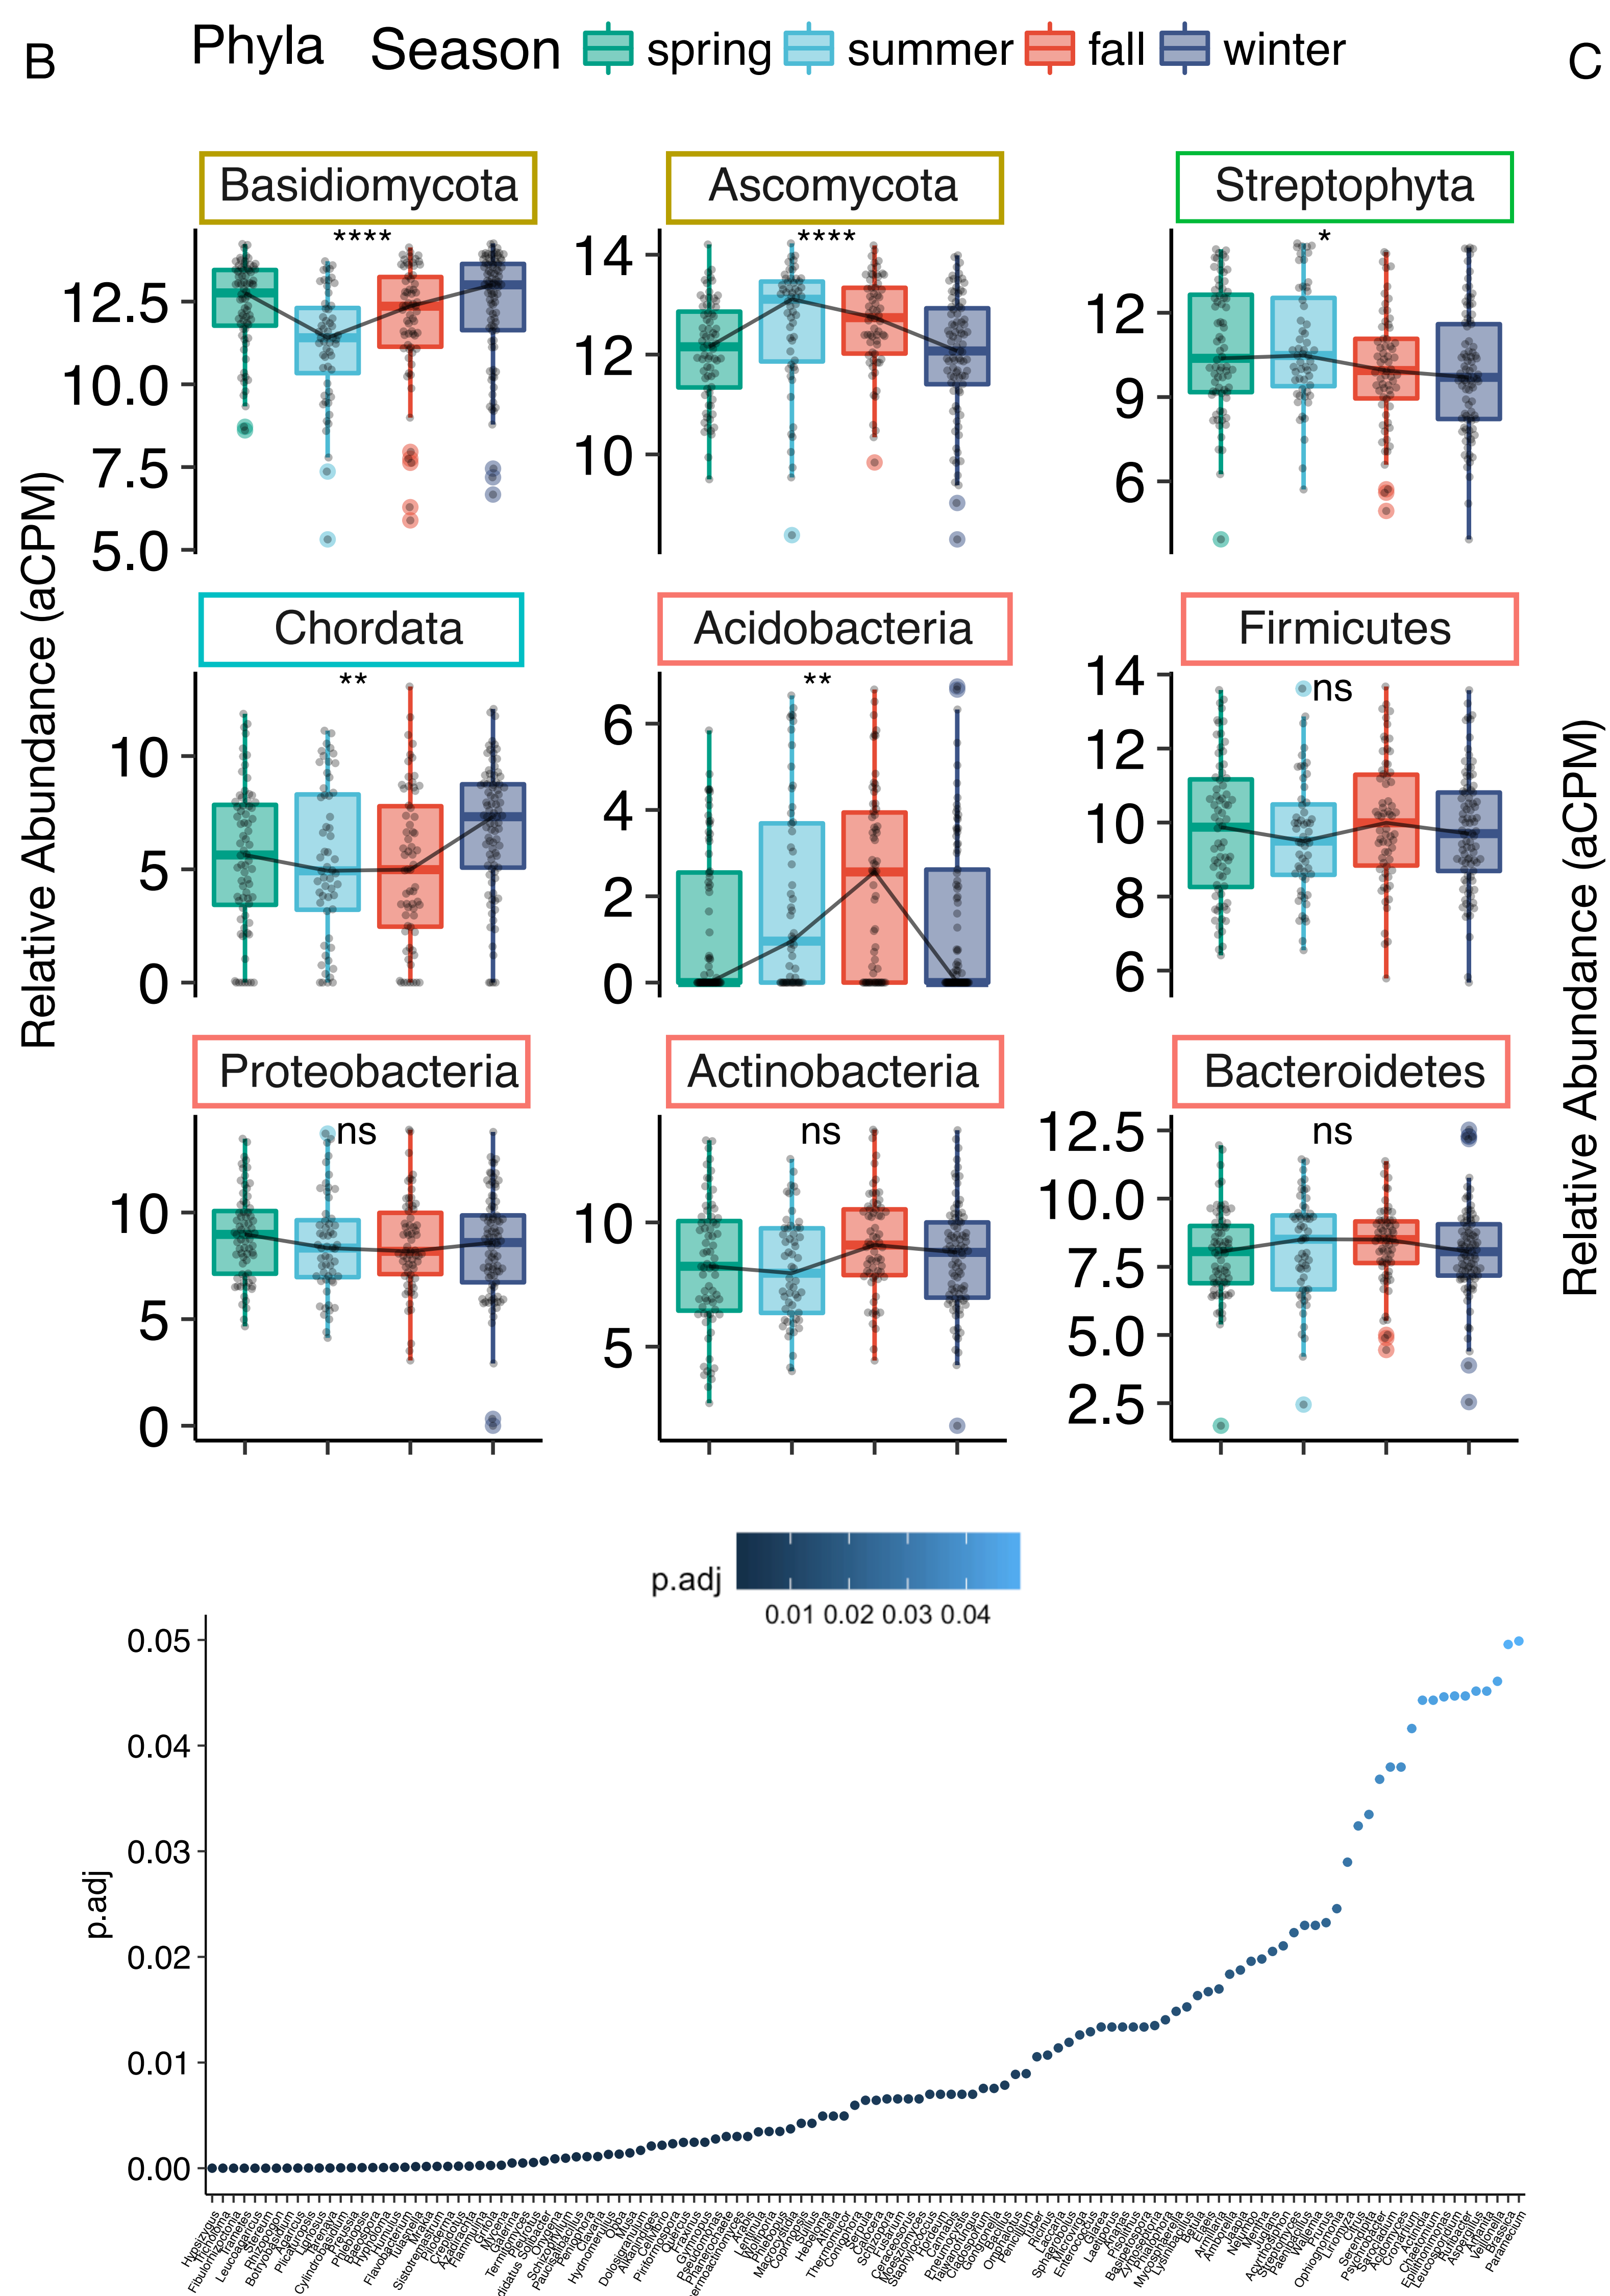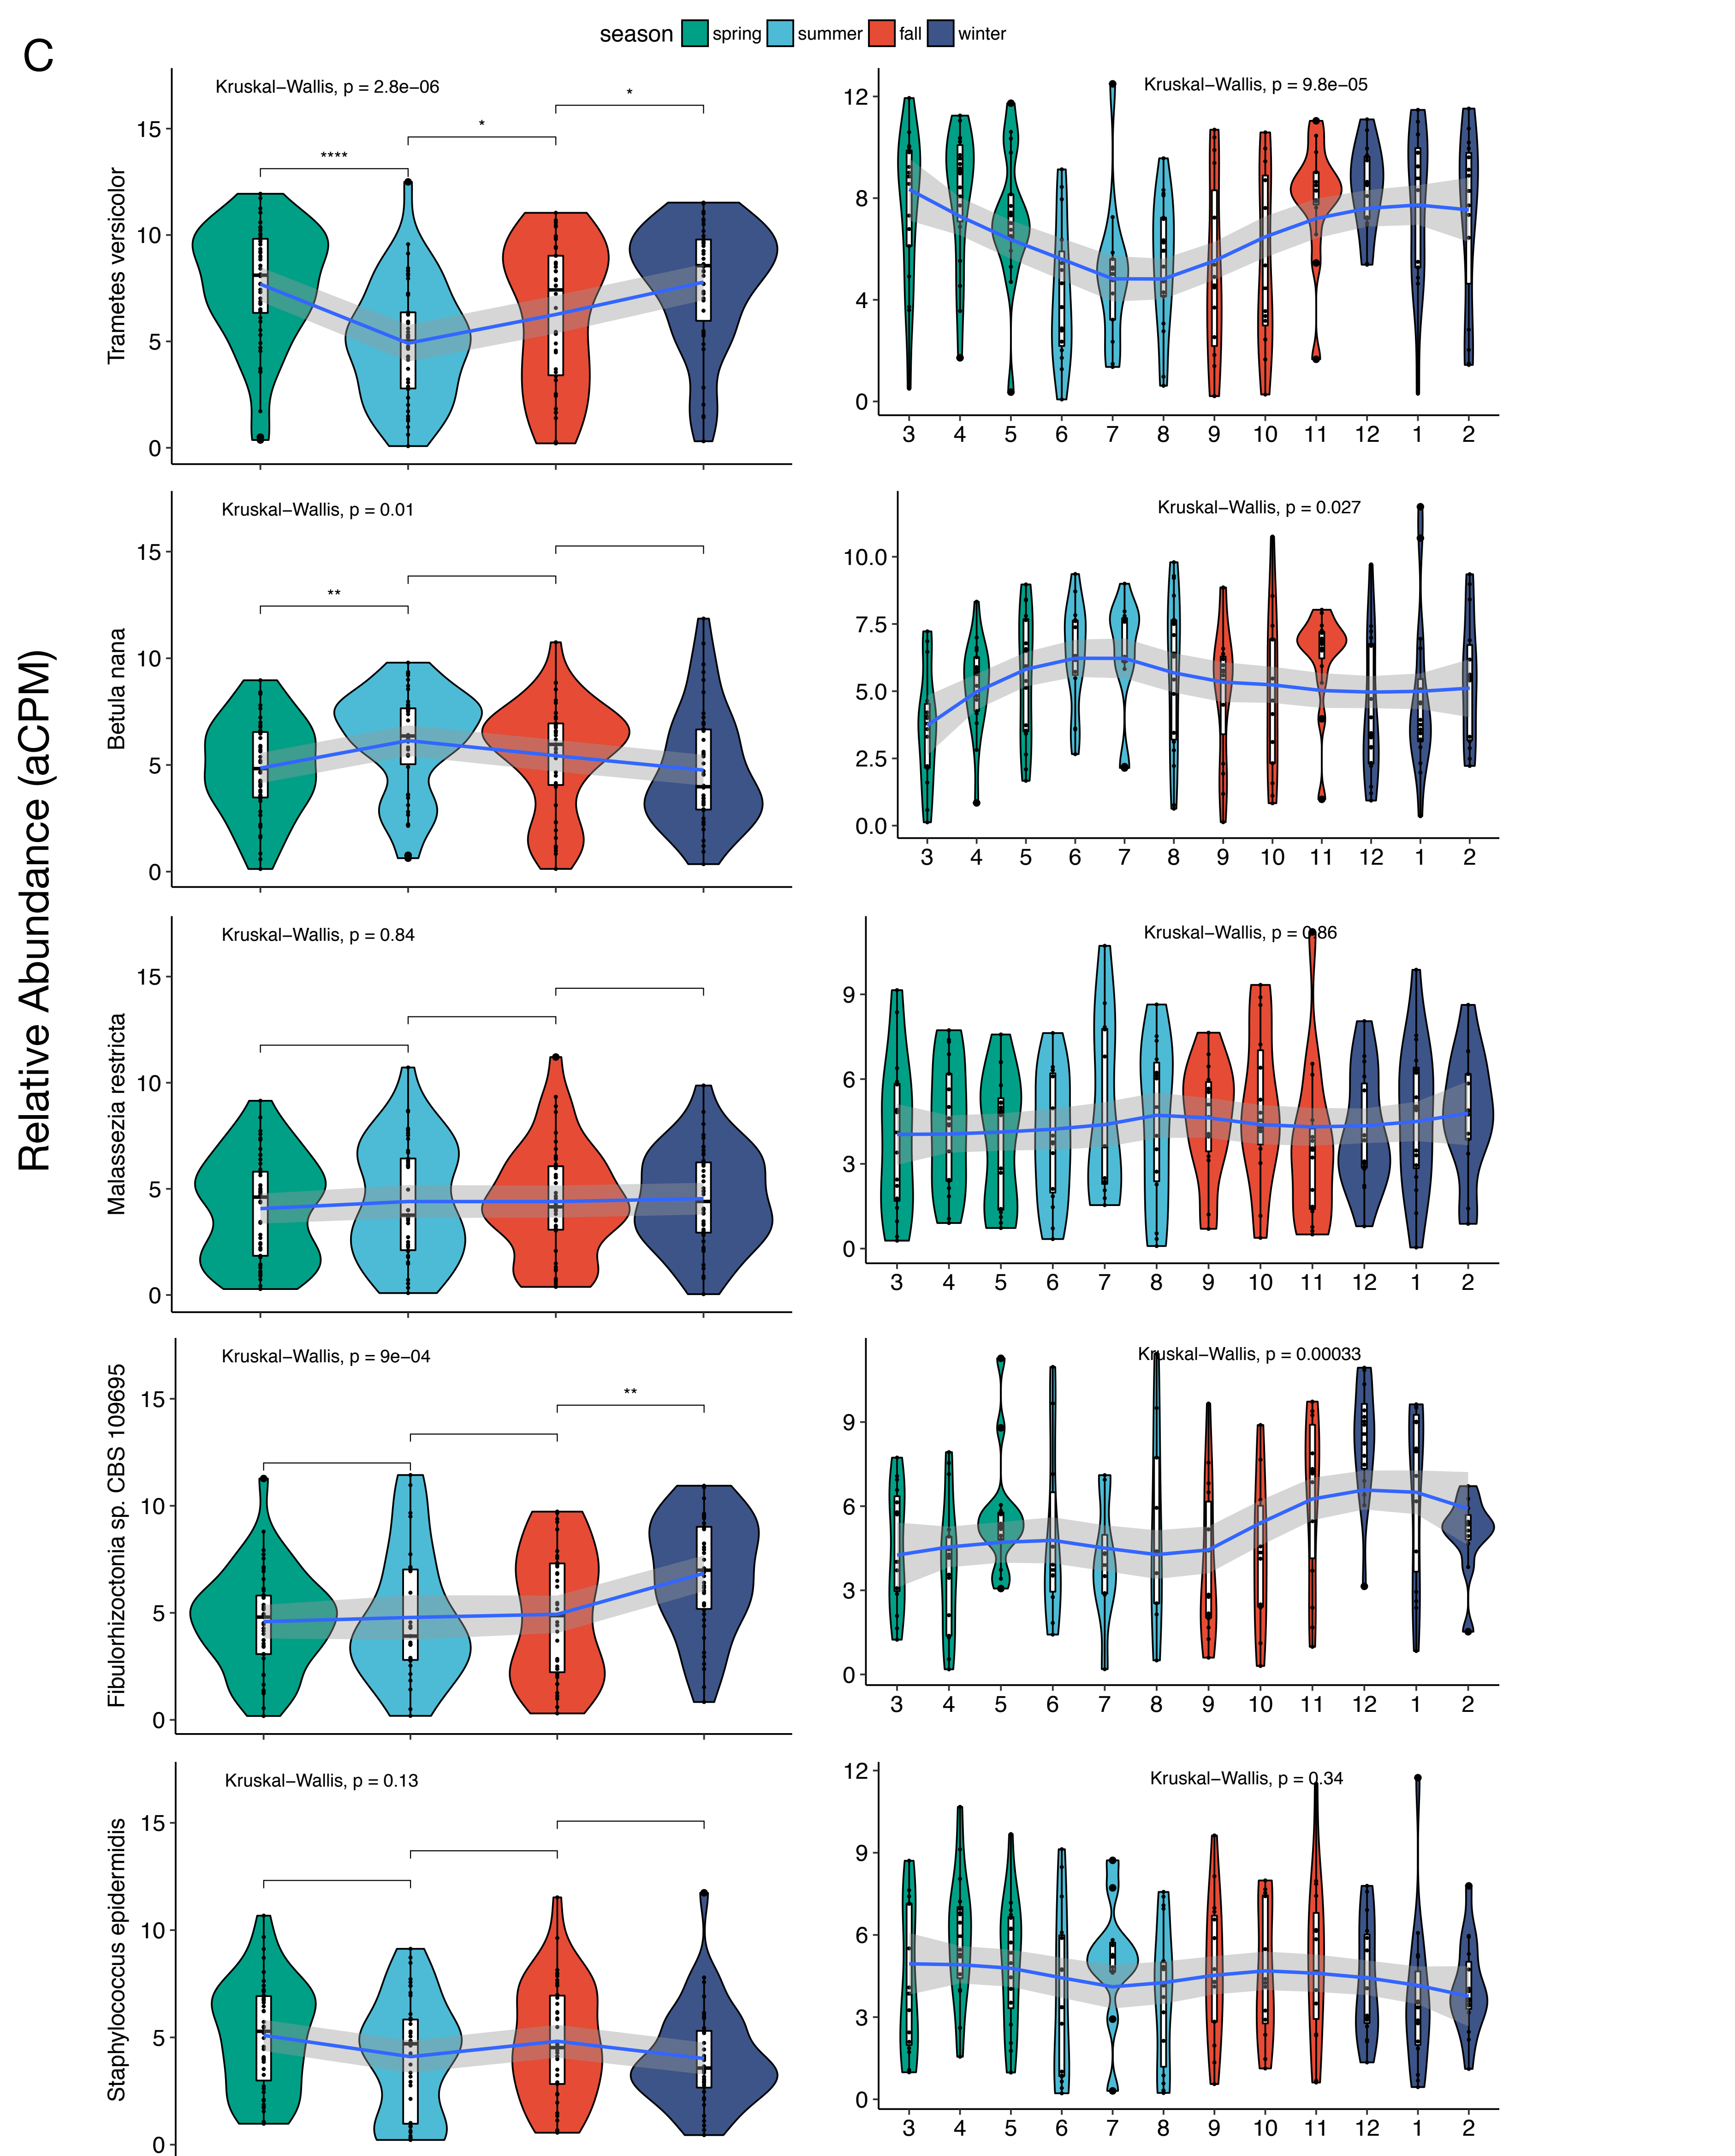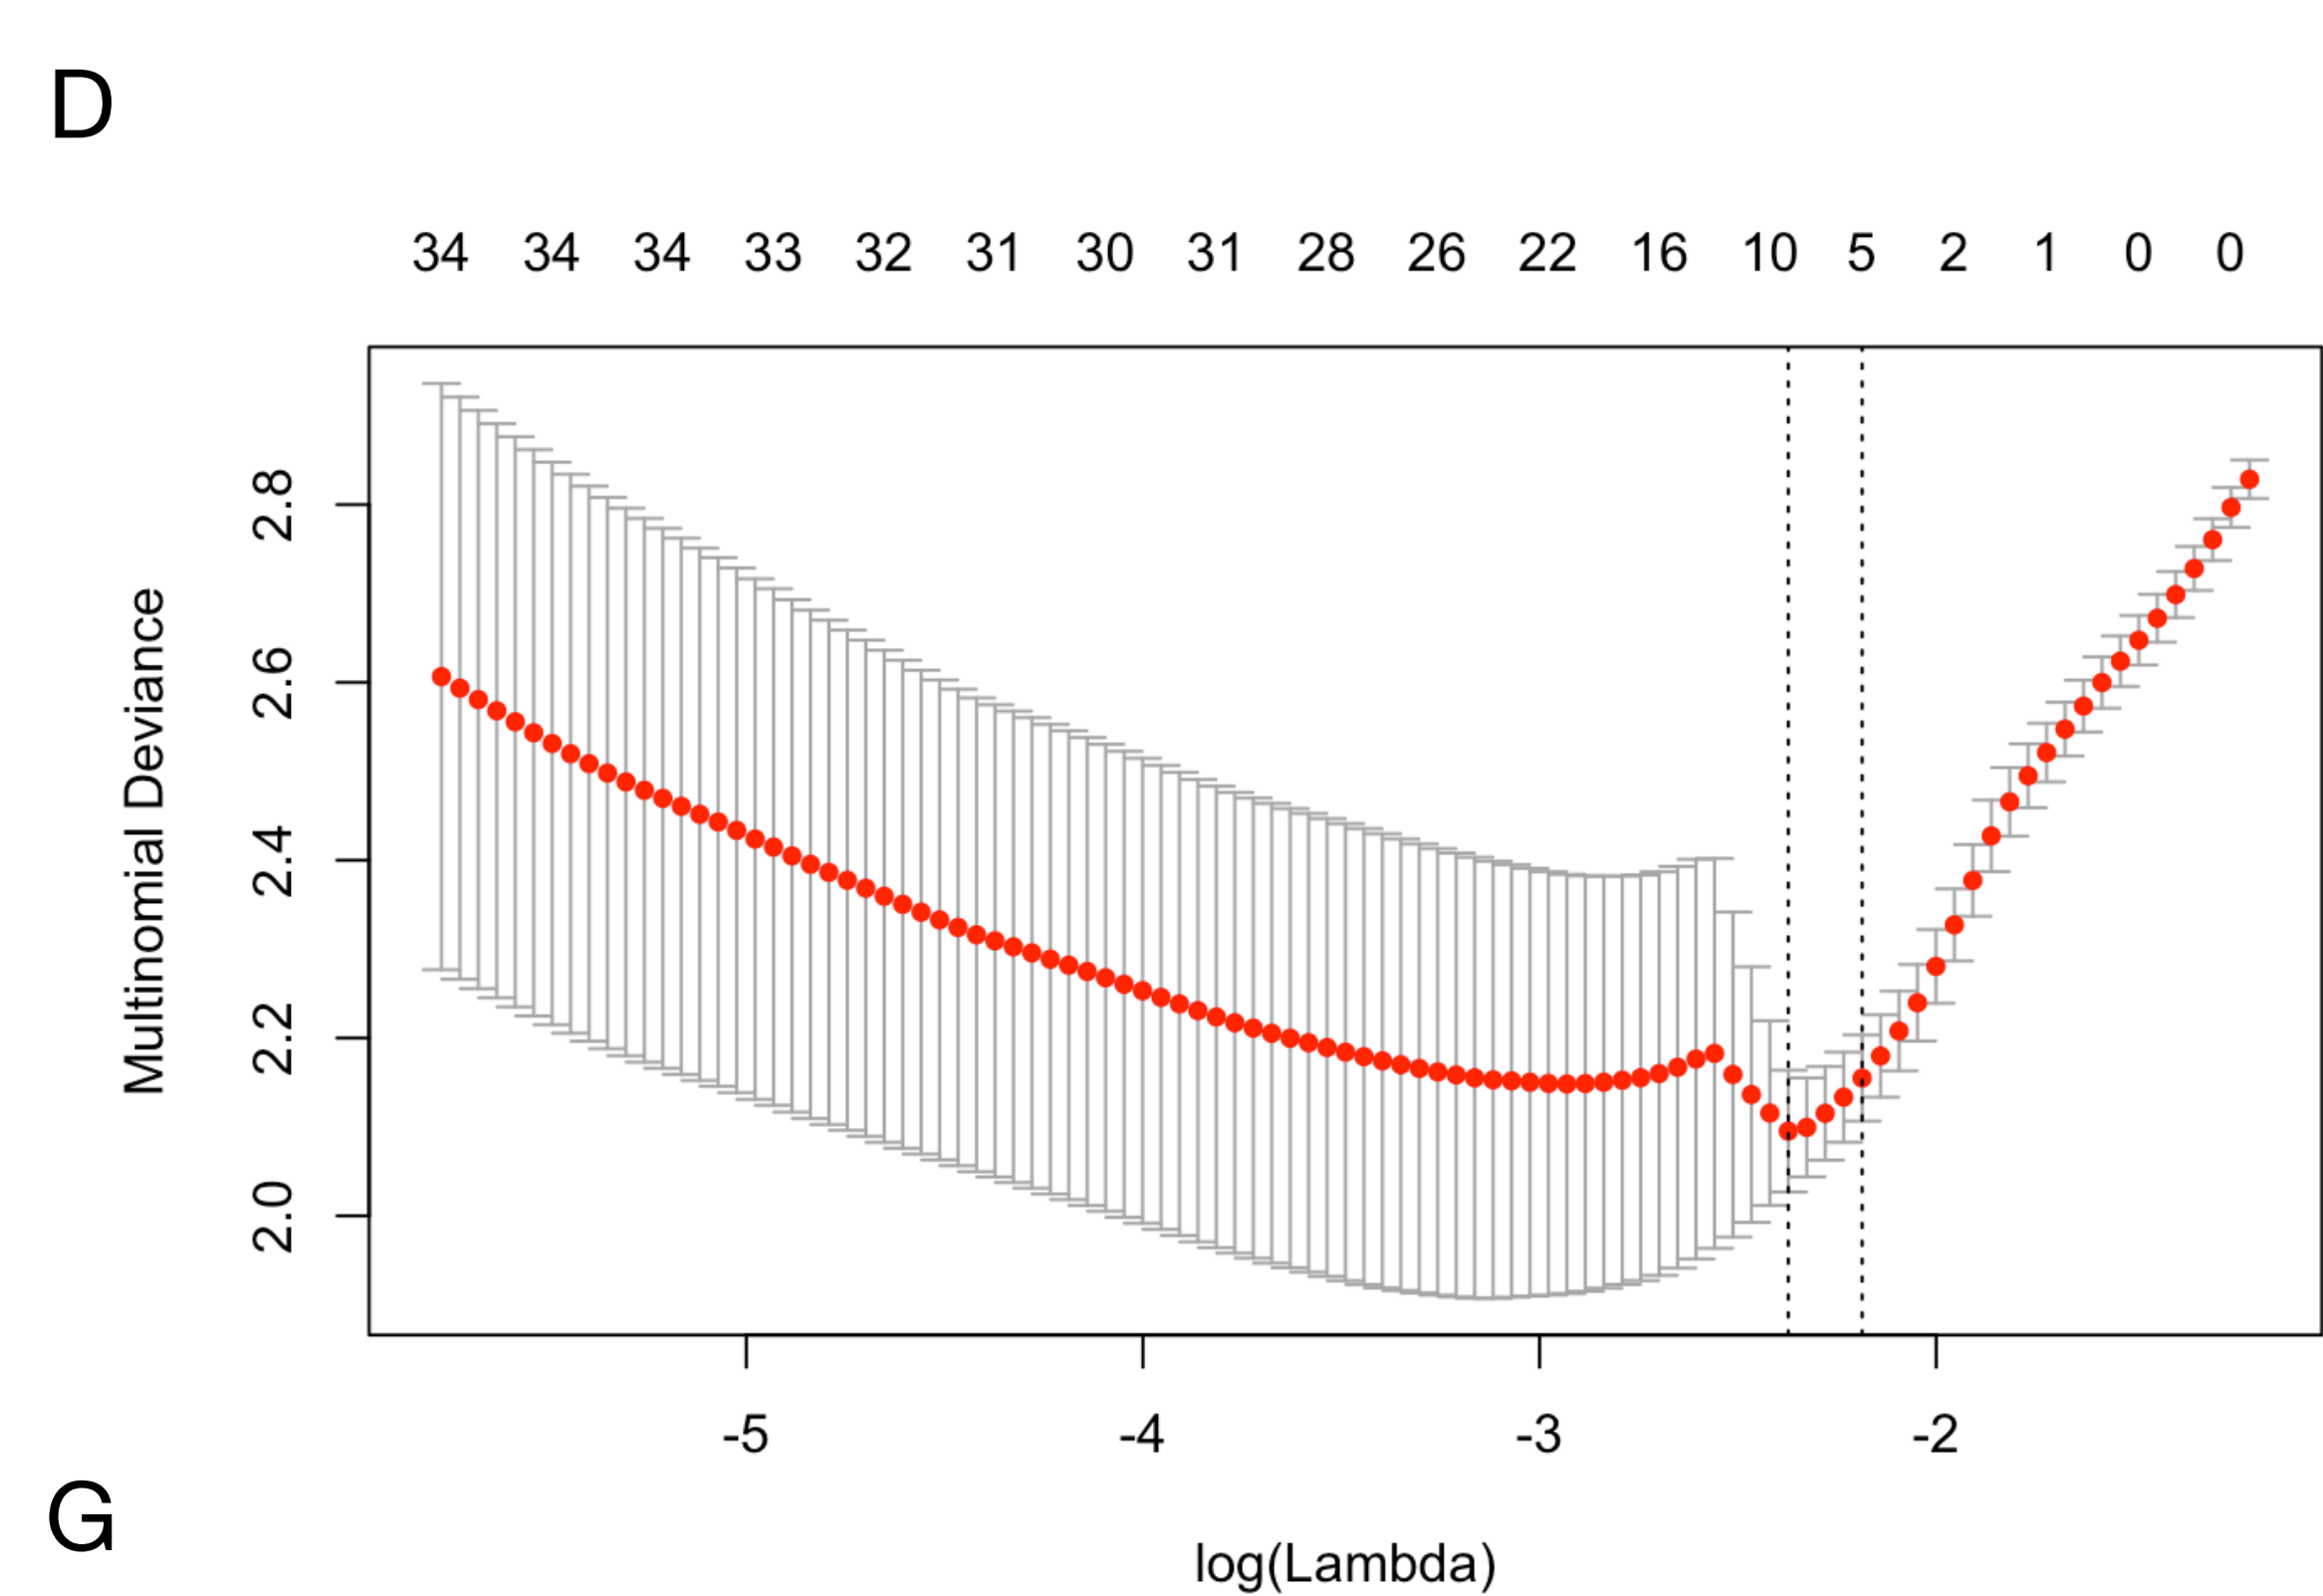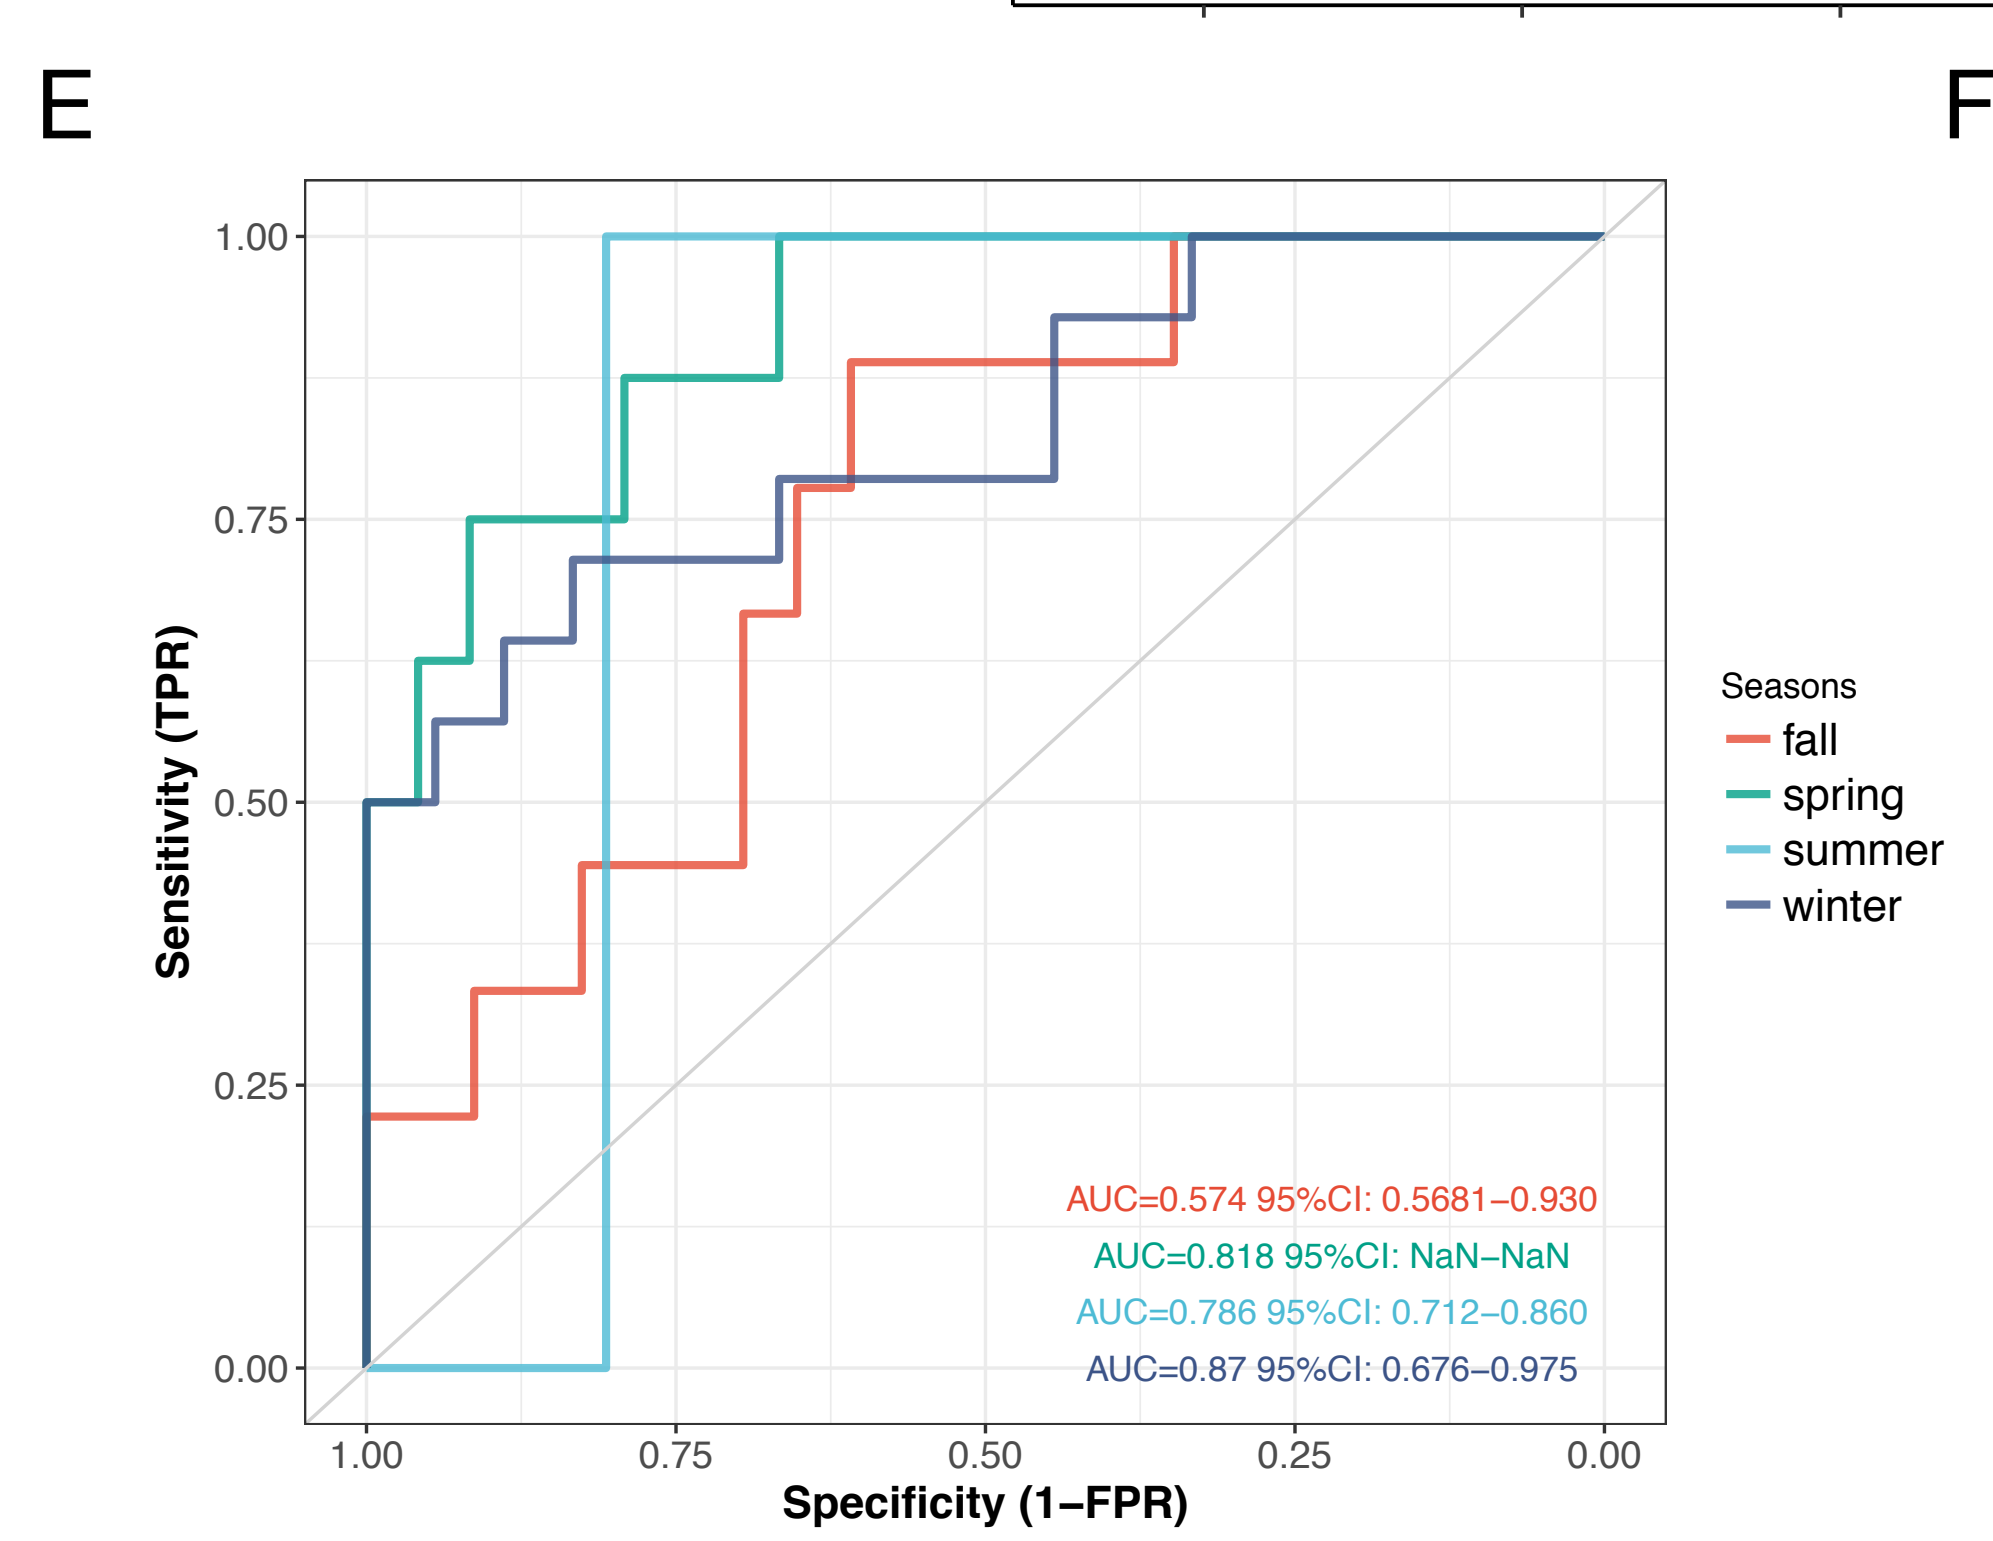

**F**

| Truth \ Predicted | spring | summer | fall | winter |
|-------------------|--------|--------|------|--------|
| spring            | 6      | 0      | 2    | 1      |
| summer            | 1      | 1      | 2    | 1      |
| fall              | 1      | 0      | 4    | 3      |
| winter            | 0      | 0      | 1    | 10     |

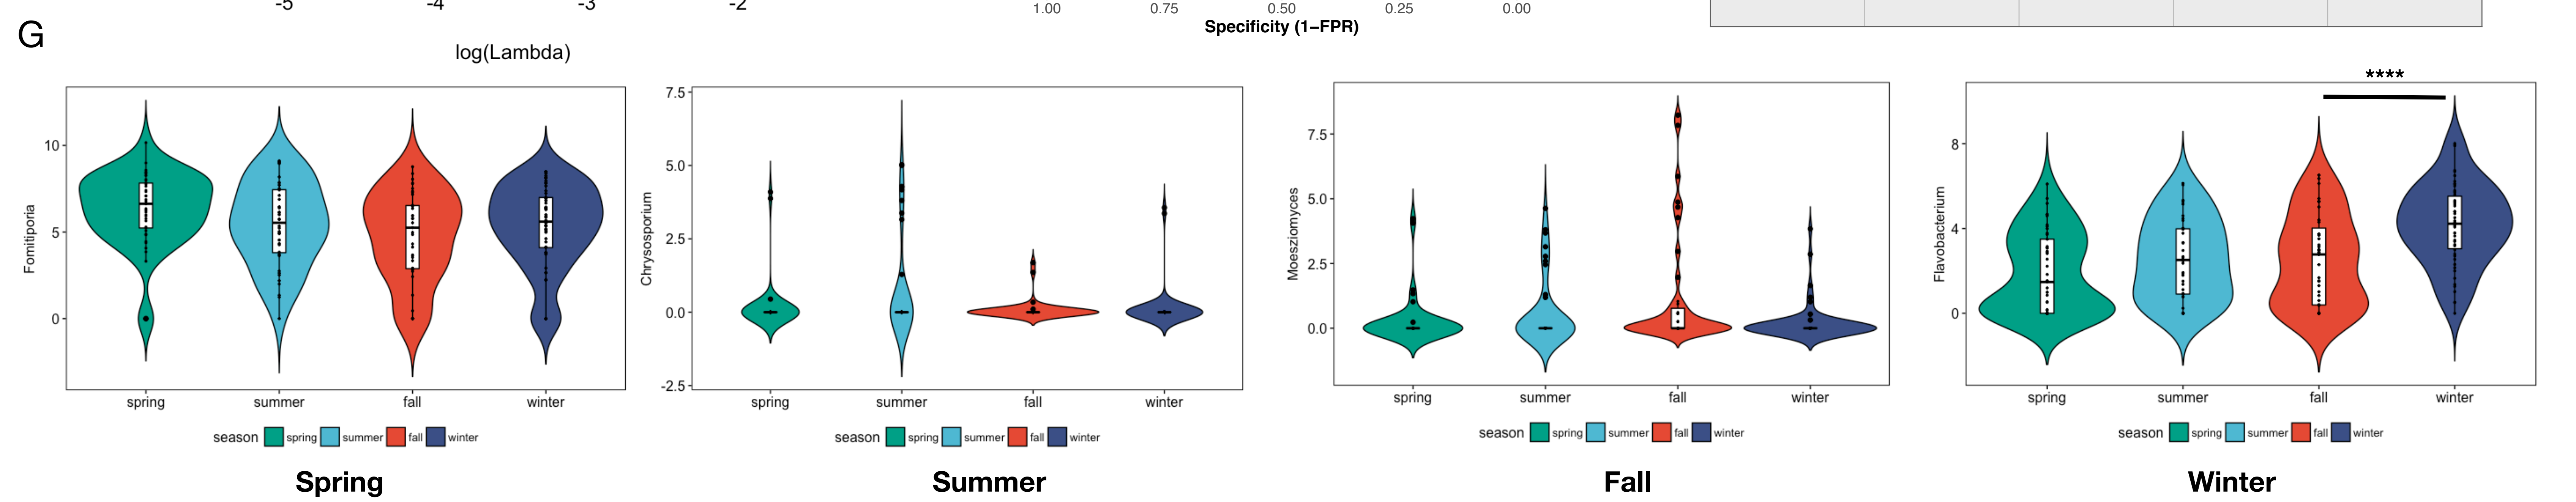

**Fig. S8**

Supplement: NIHMS1507935-supplement-11.pdf [file NIHMS1507935-supplement-11.pdf]

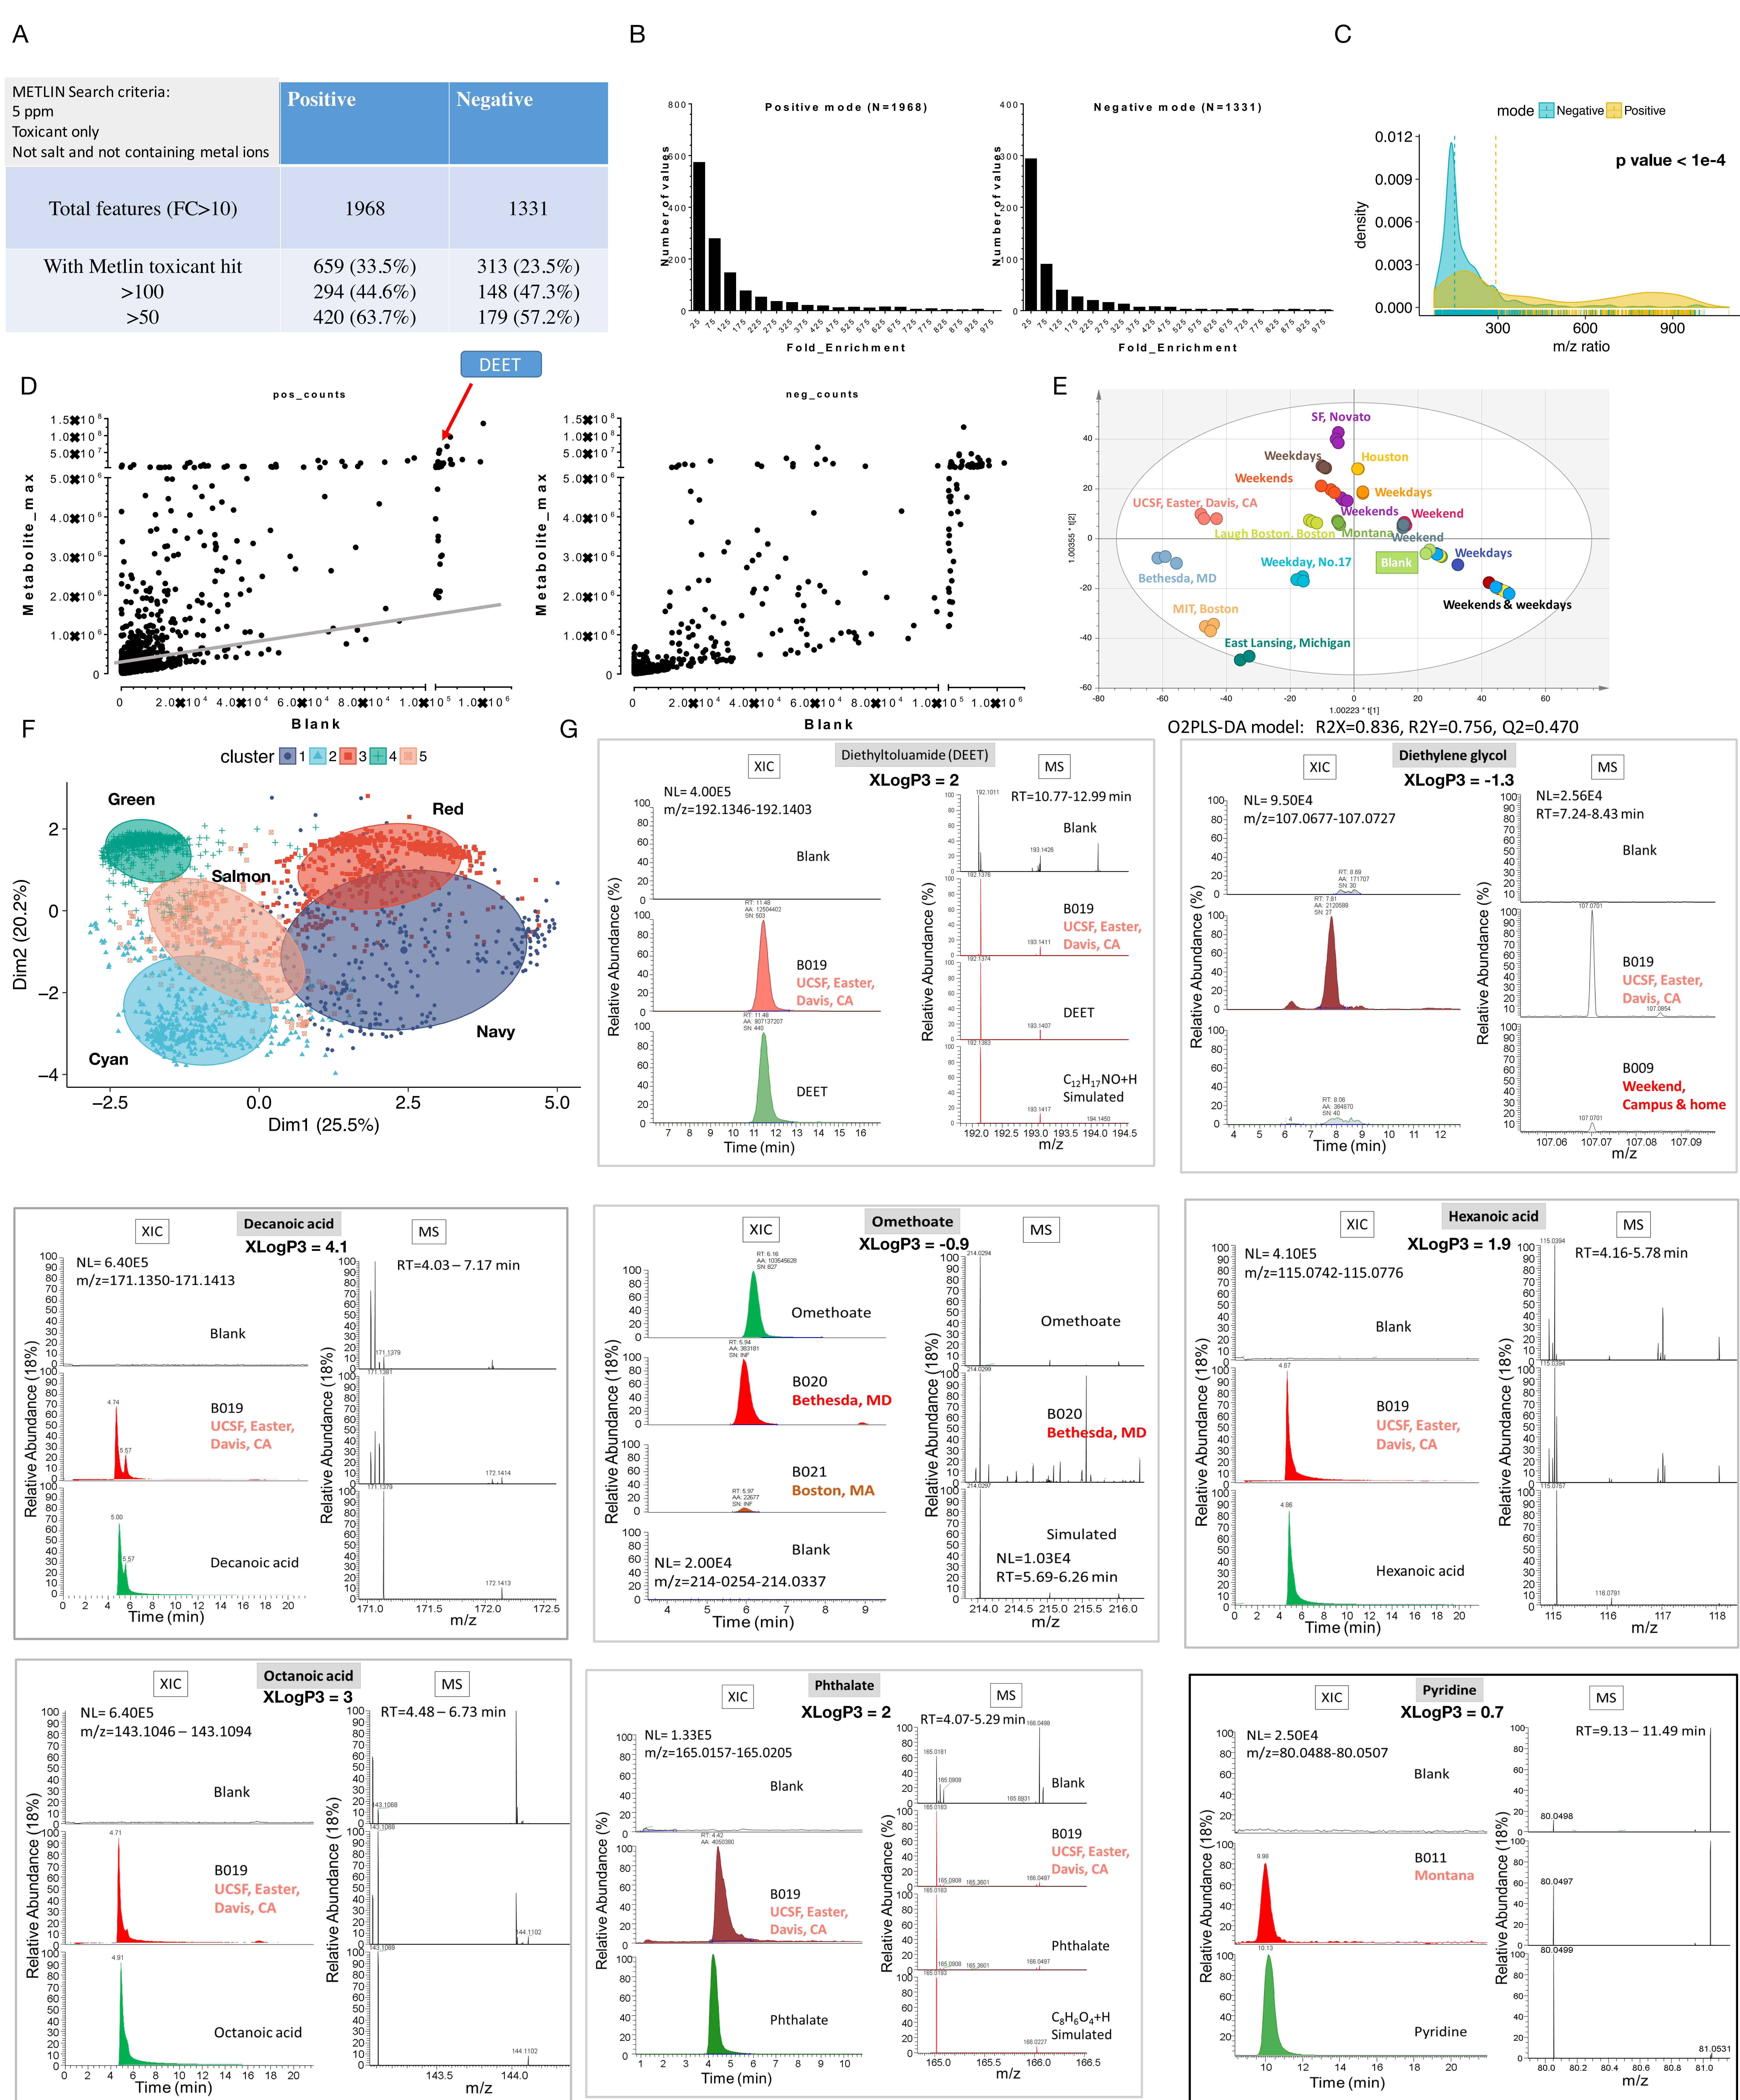

Fig. S9

Supplement: NIHMS1507935-supplement-12.pdf [file NIHMS1507935-supplement-12.pdf]

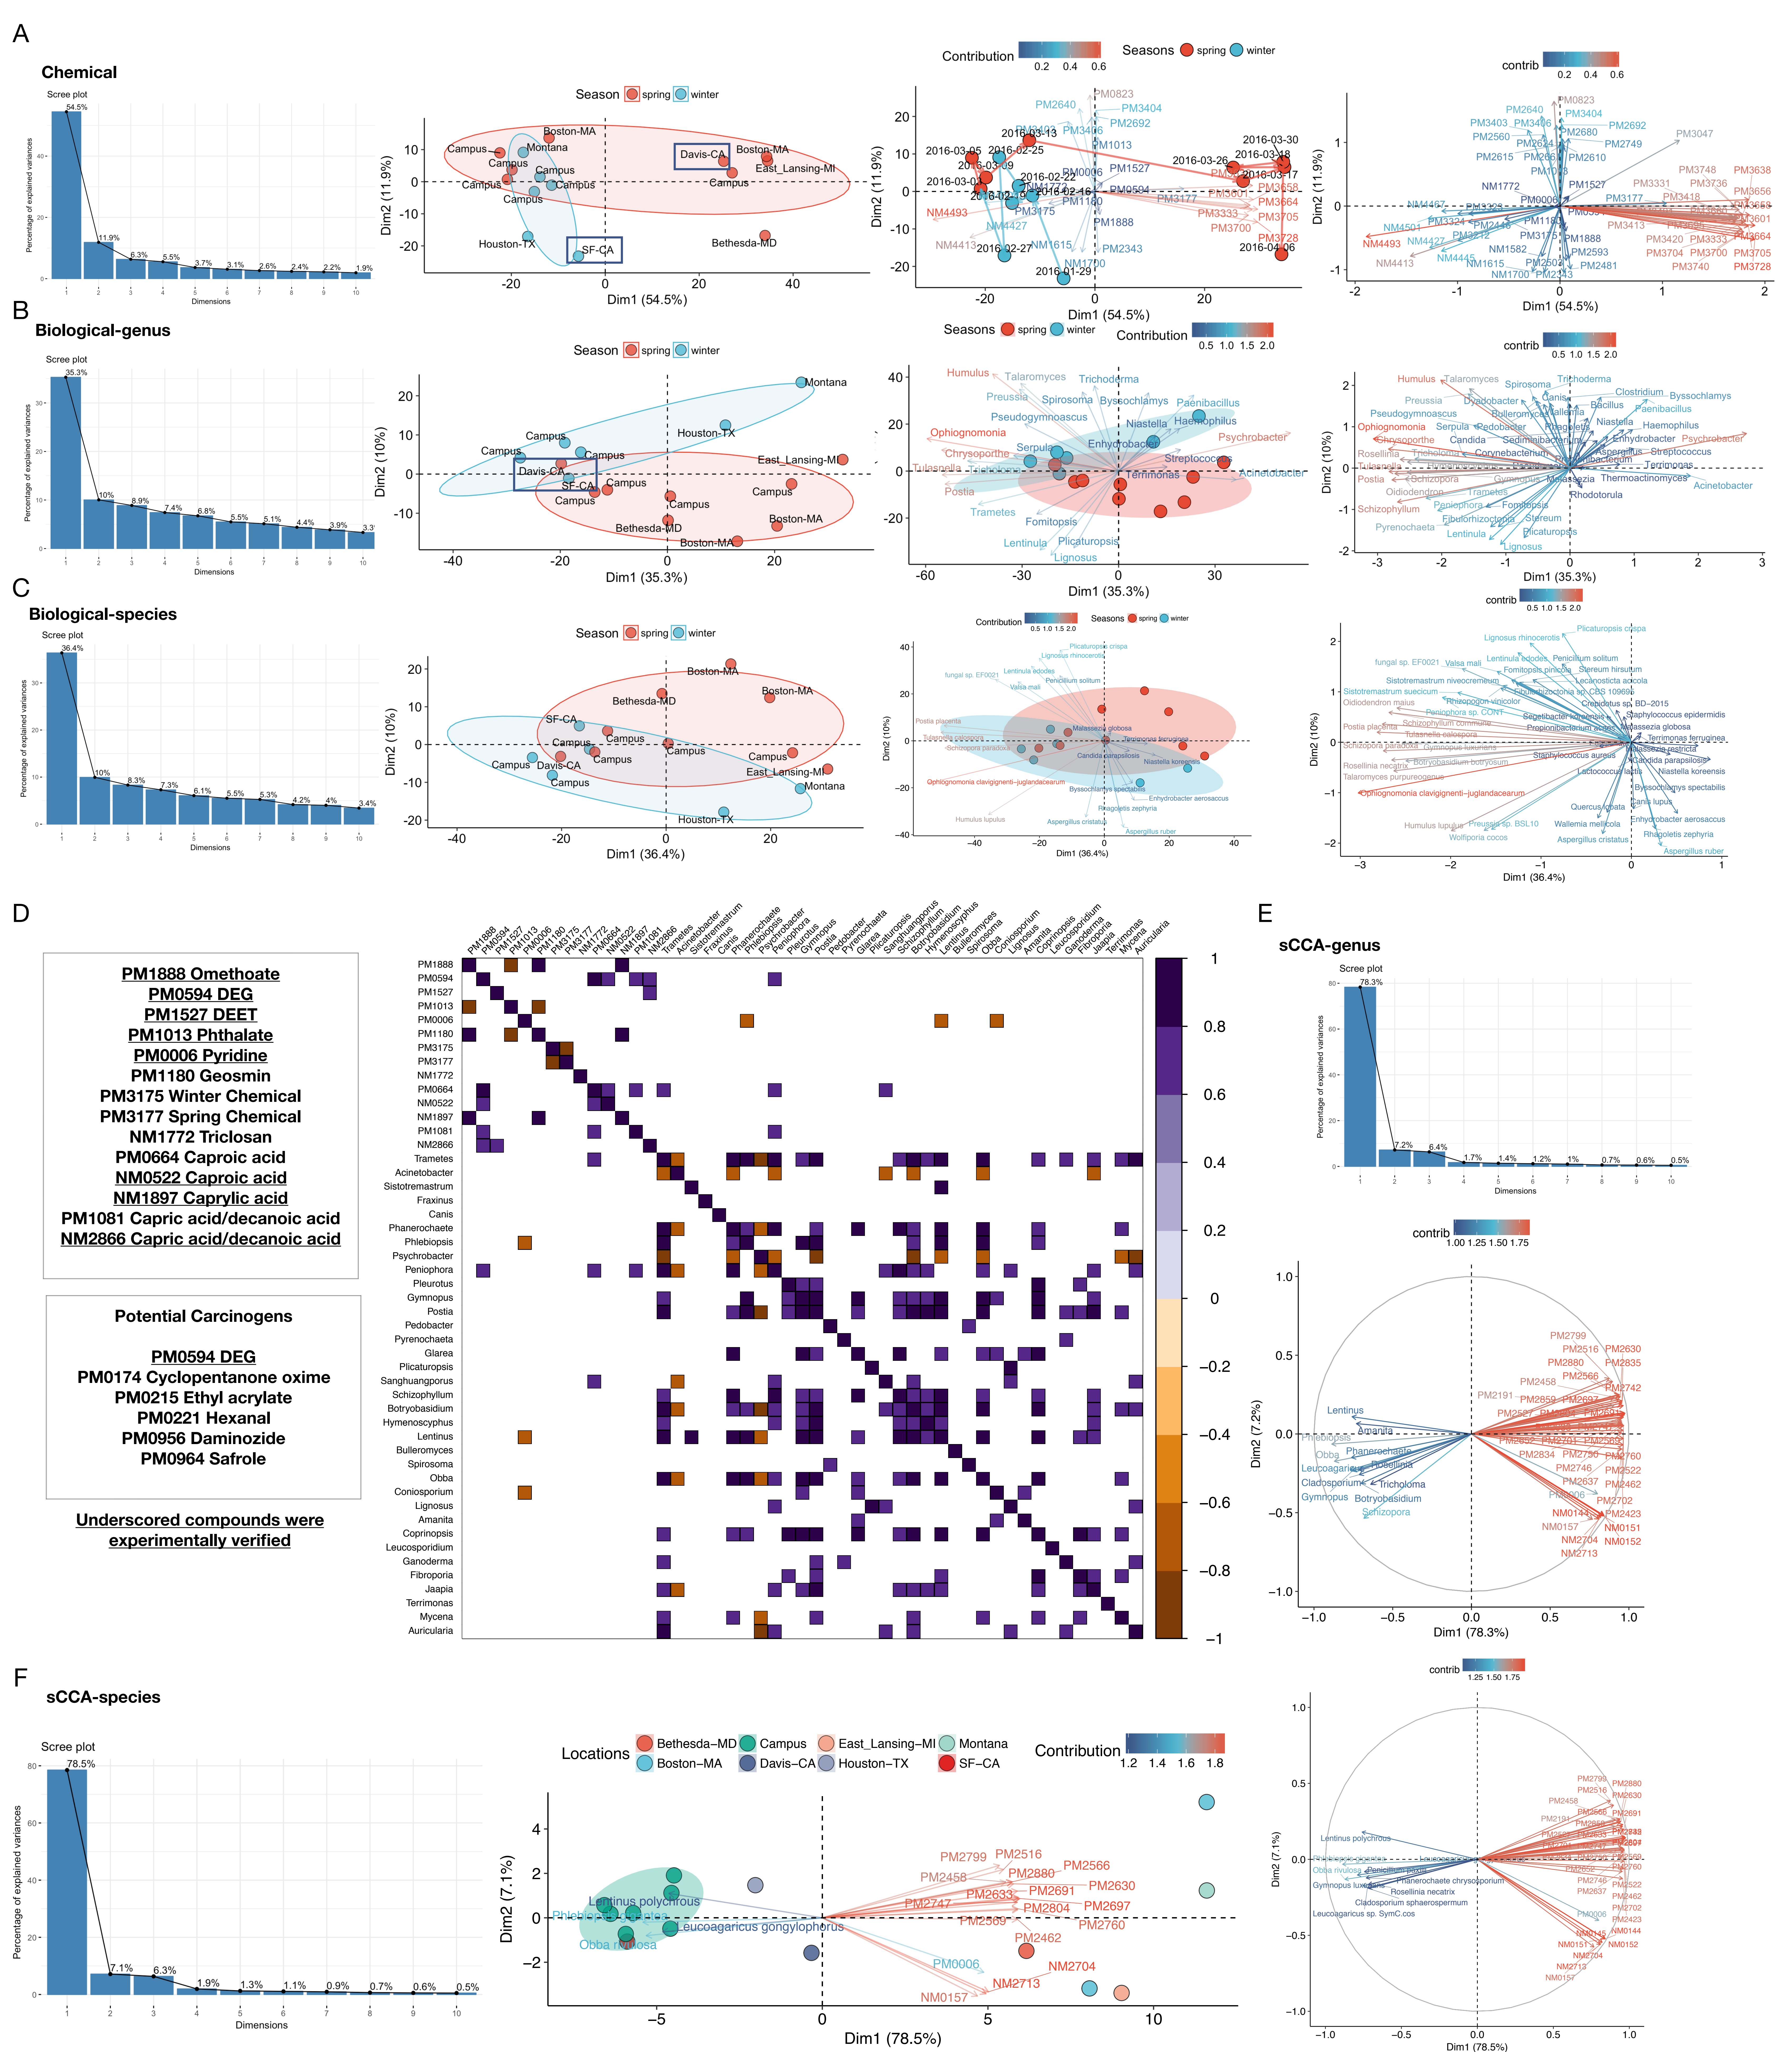

Fig. S10

Supplement: NIHMS1507935-supplement-13.pdf [file NIHMS1507935-supplement-13.pdf]

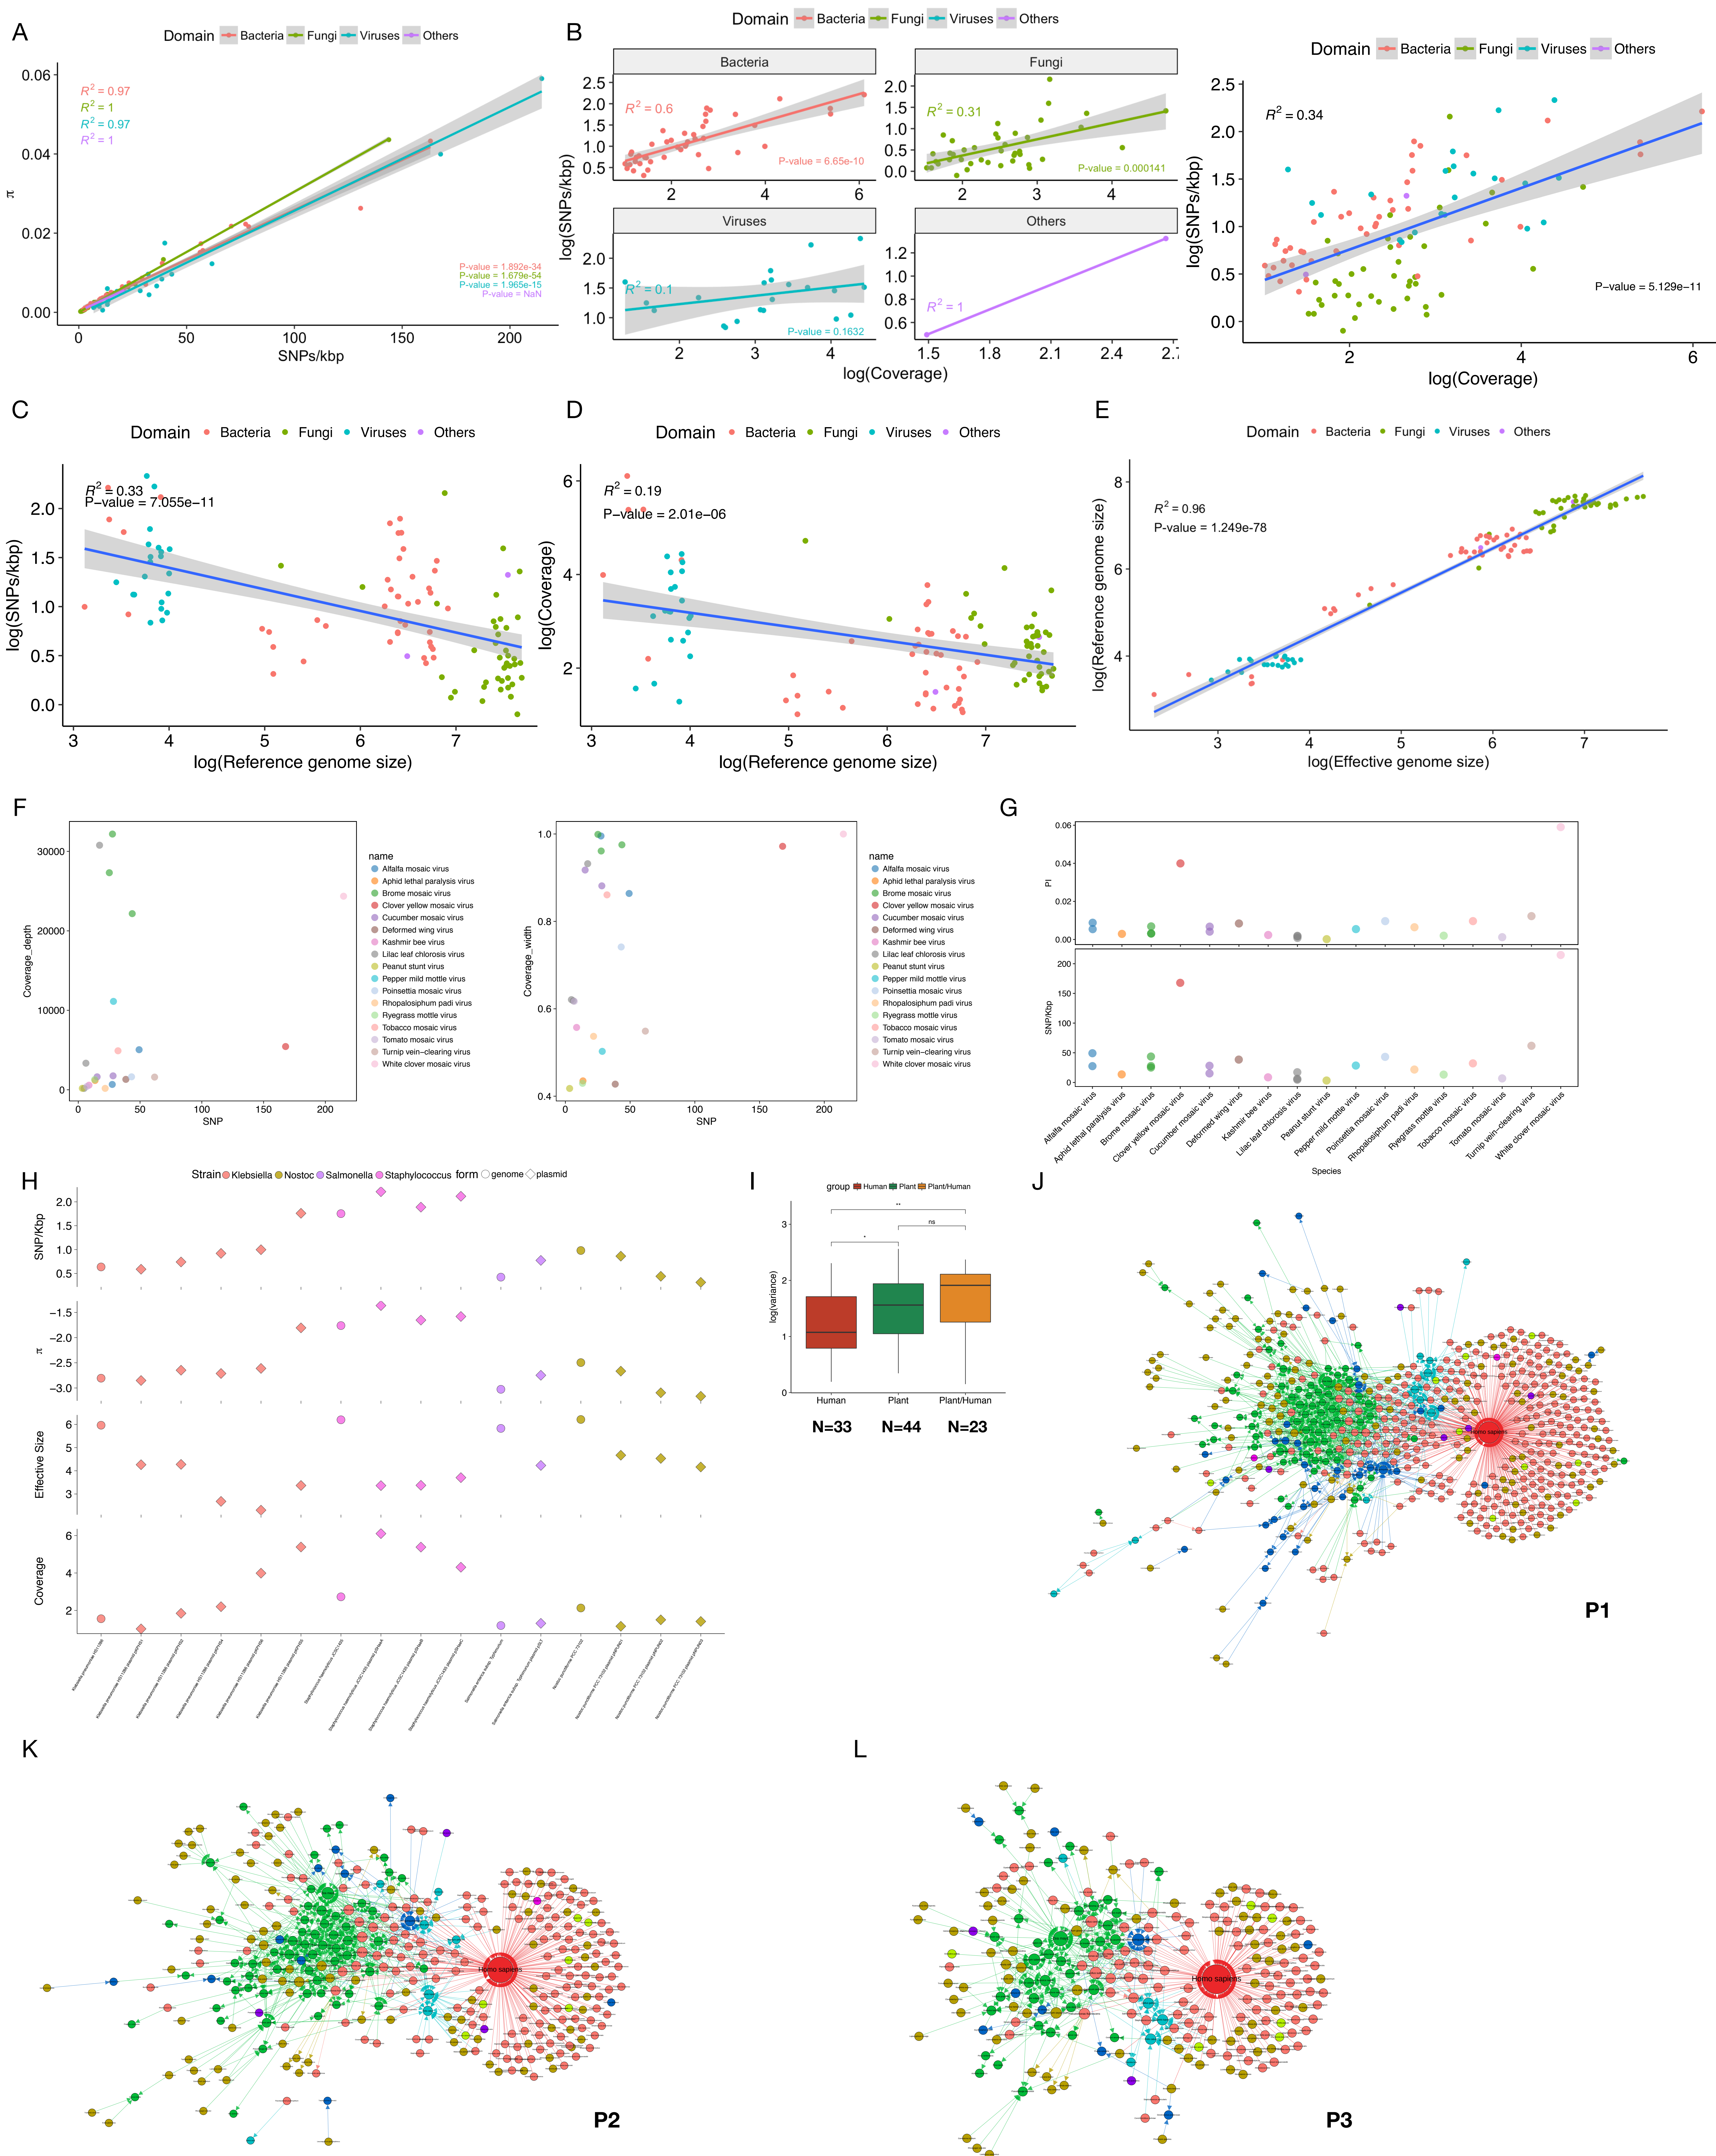

Fig. S11

Supplement: NIHMS1507935-supplement-14.pdf [file NIHMS1507935-supplement-14.pdf]

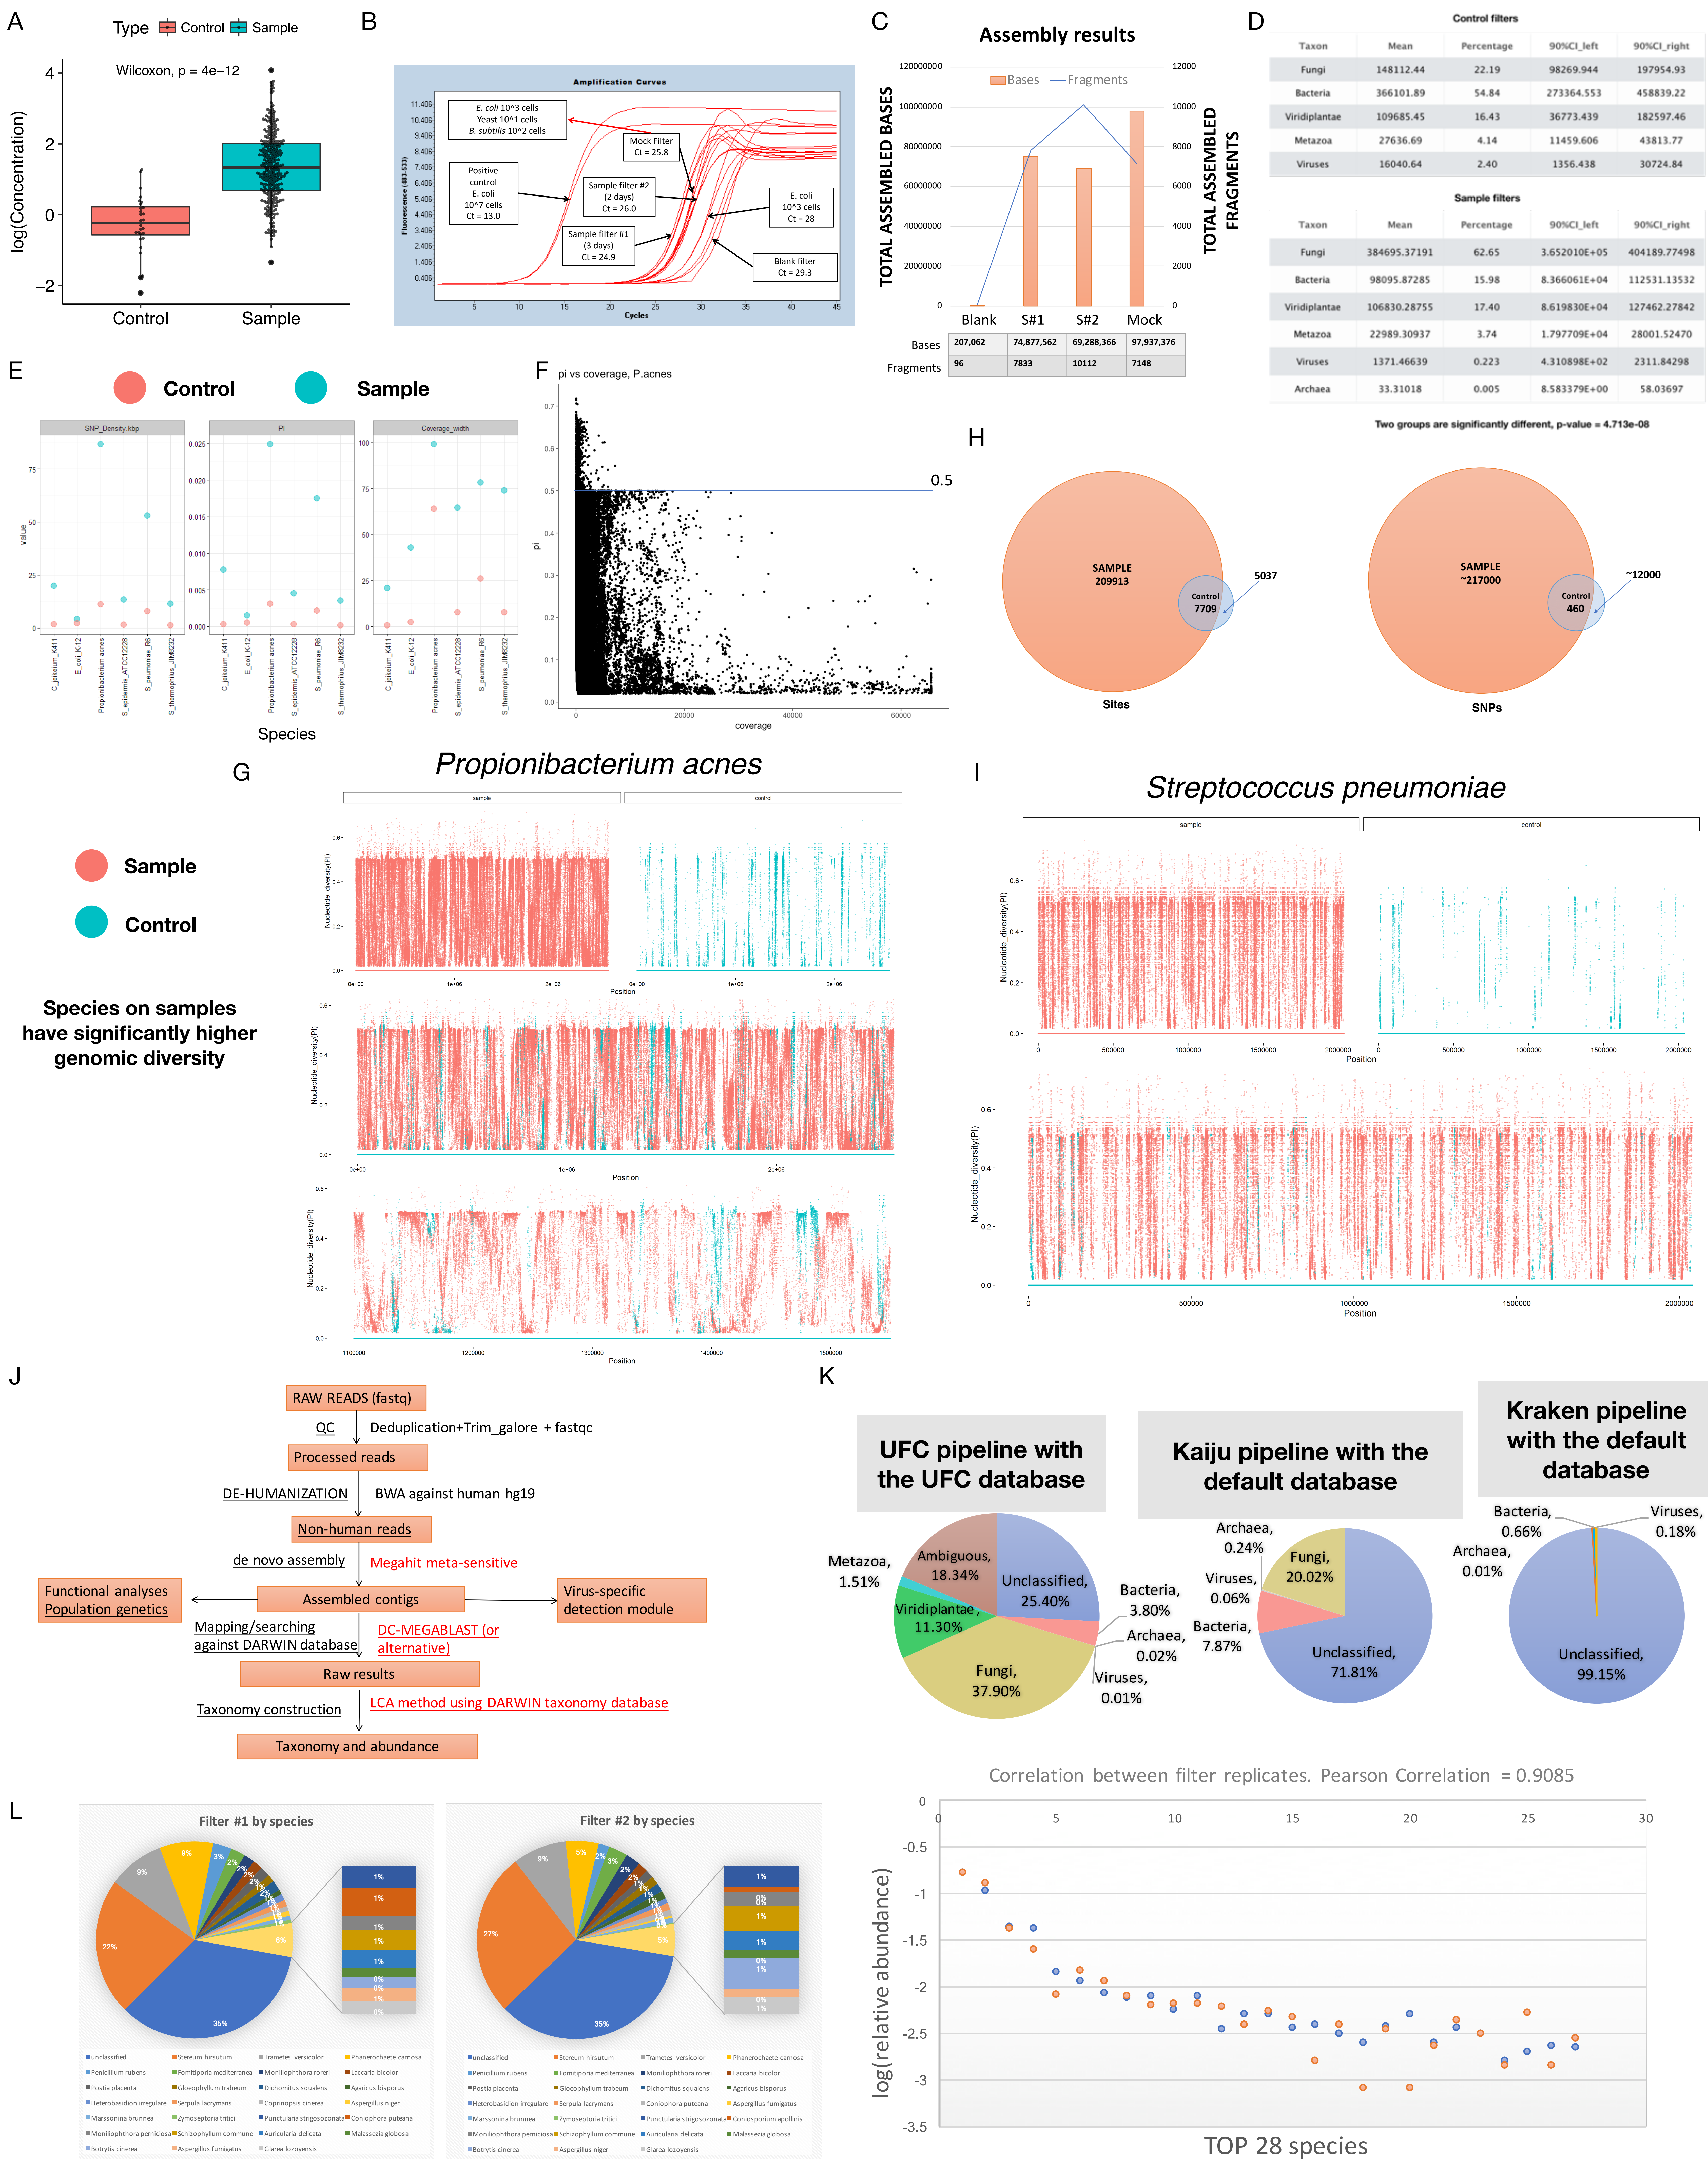

Fig. S2

Supplement: NIHMS1507935-supplement-5.pdf [file NIHMS1507935-supplement-5.pdf]

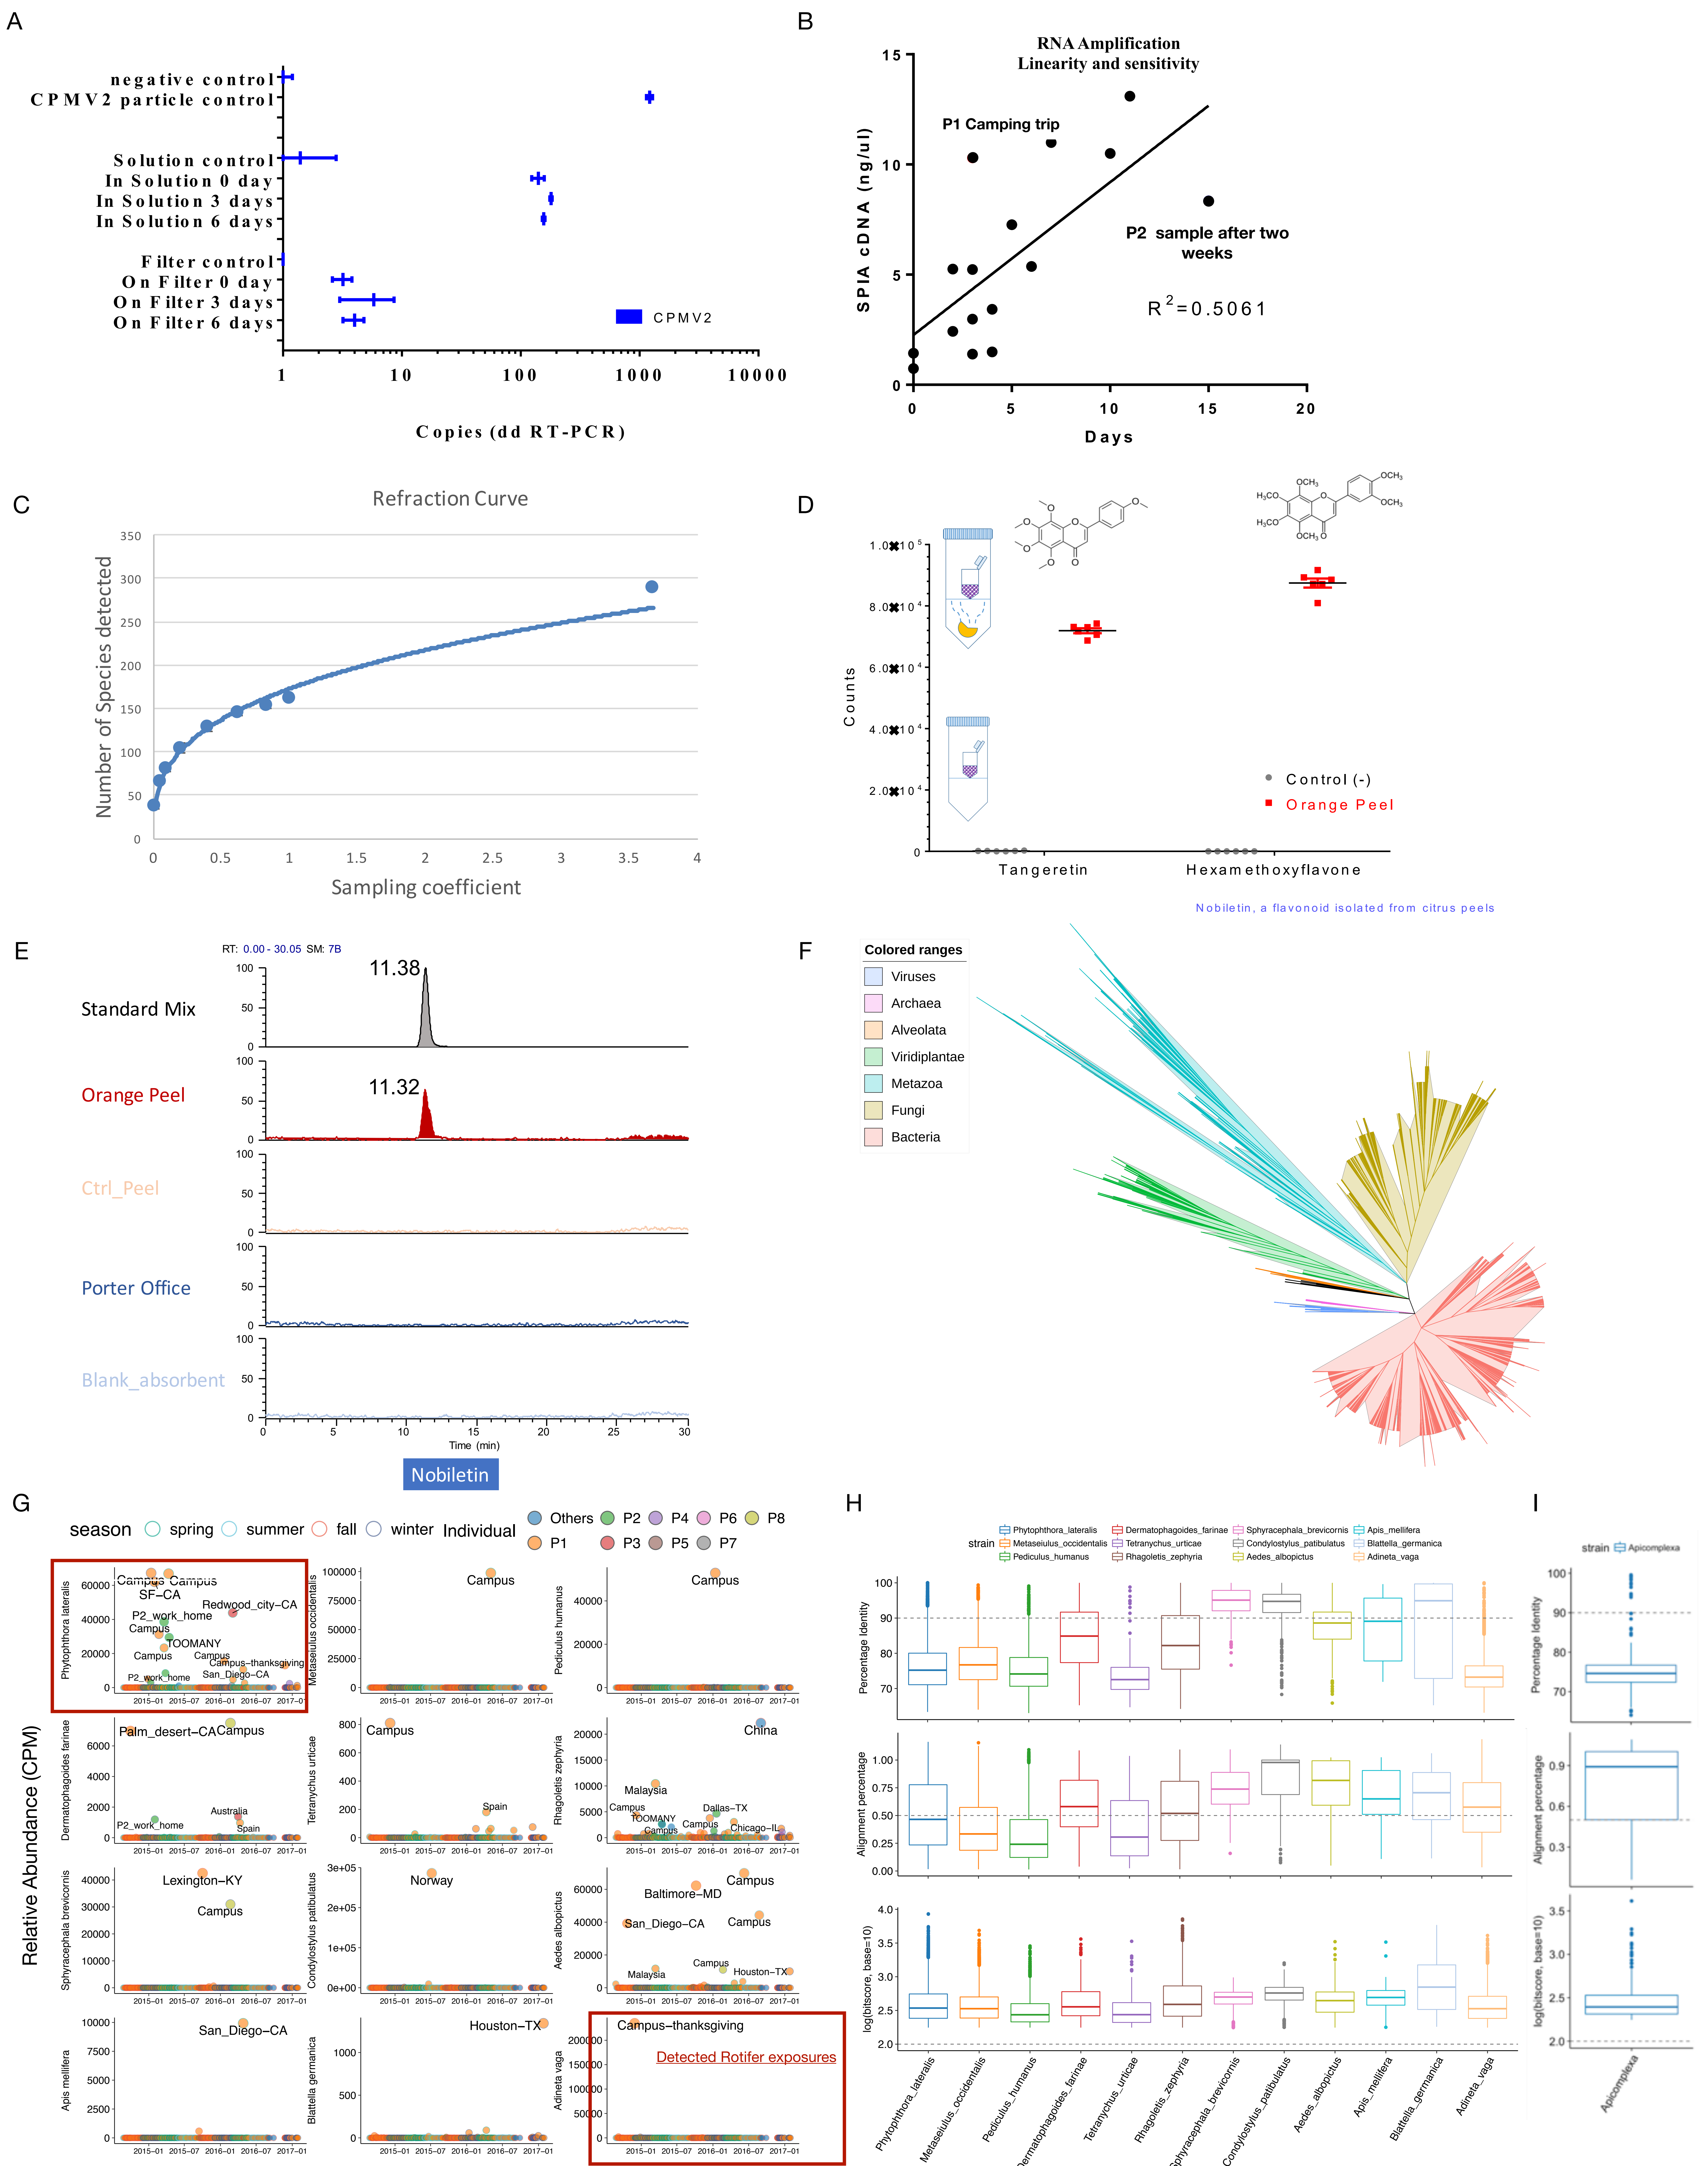

Fig. S3

Supplement: NIHMS1507935-supplement-6.pdf [file NIHMS1507935-supplement-6.pdf]

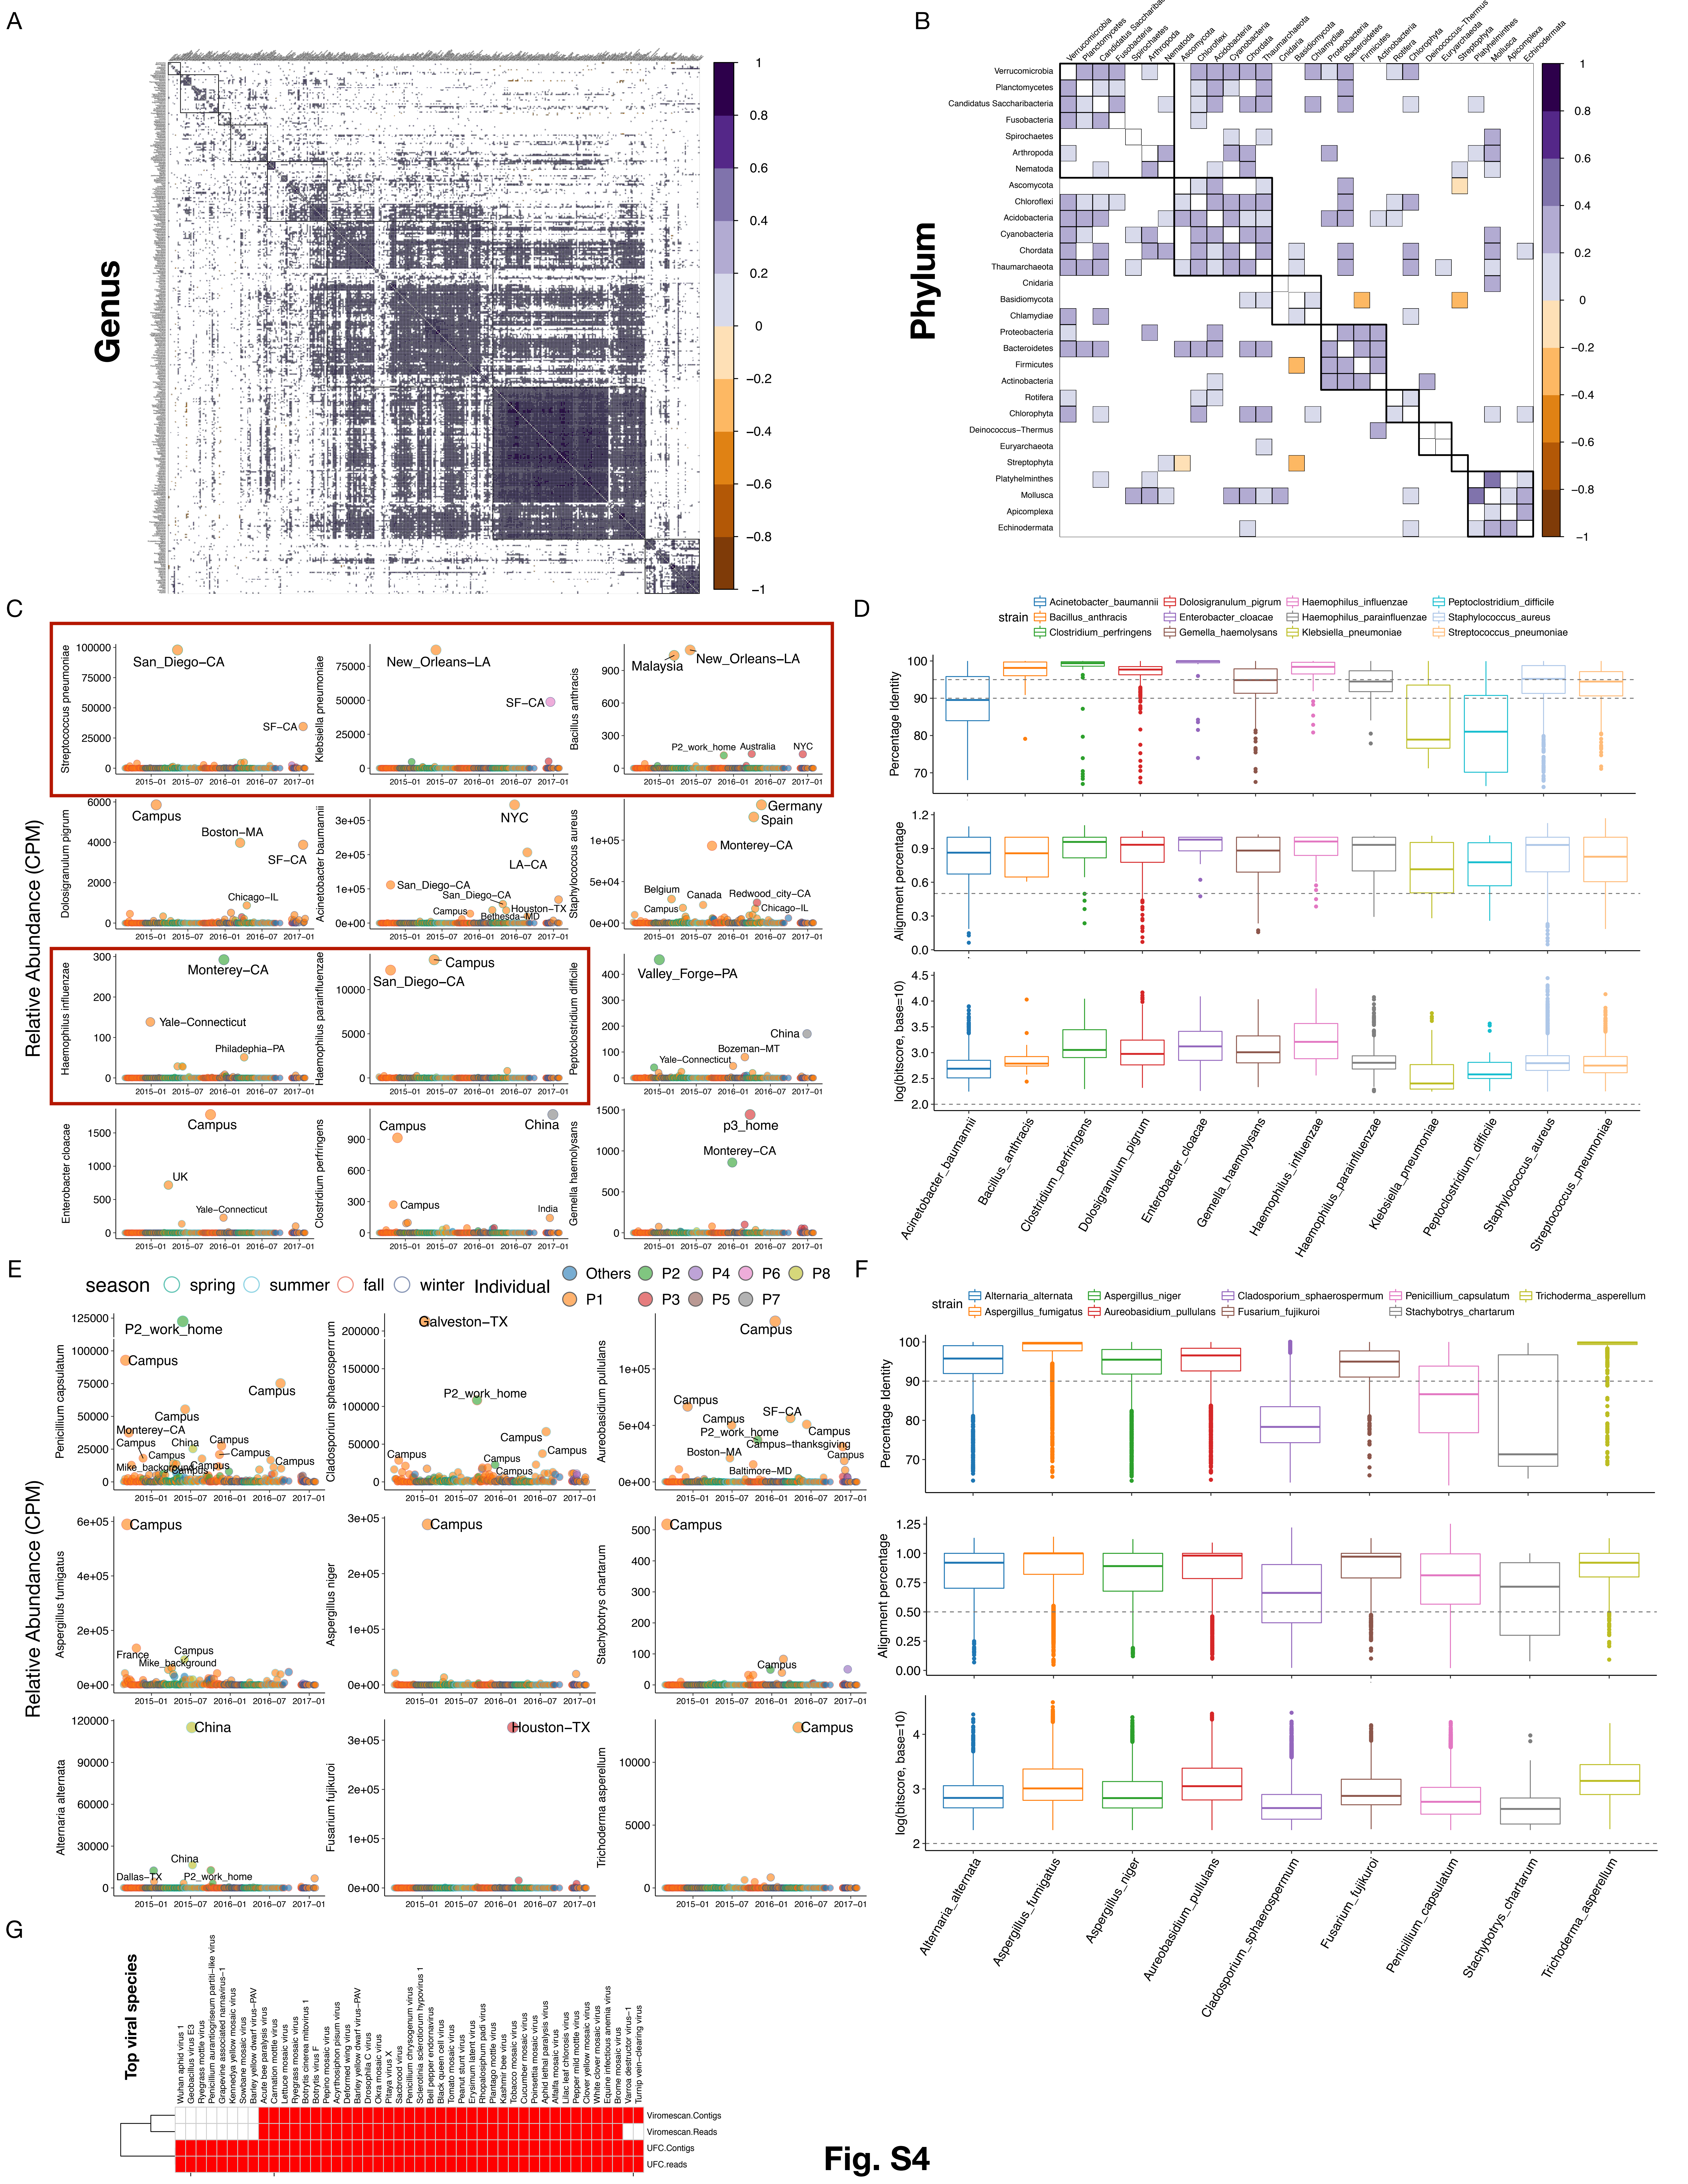

Supplement: NIHMS1507935-supplement-7.pdf [file NIHMS1507935-supplement-7.pdf]

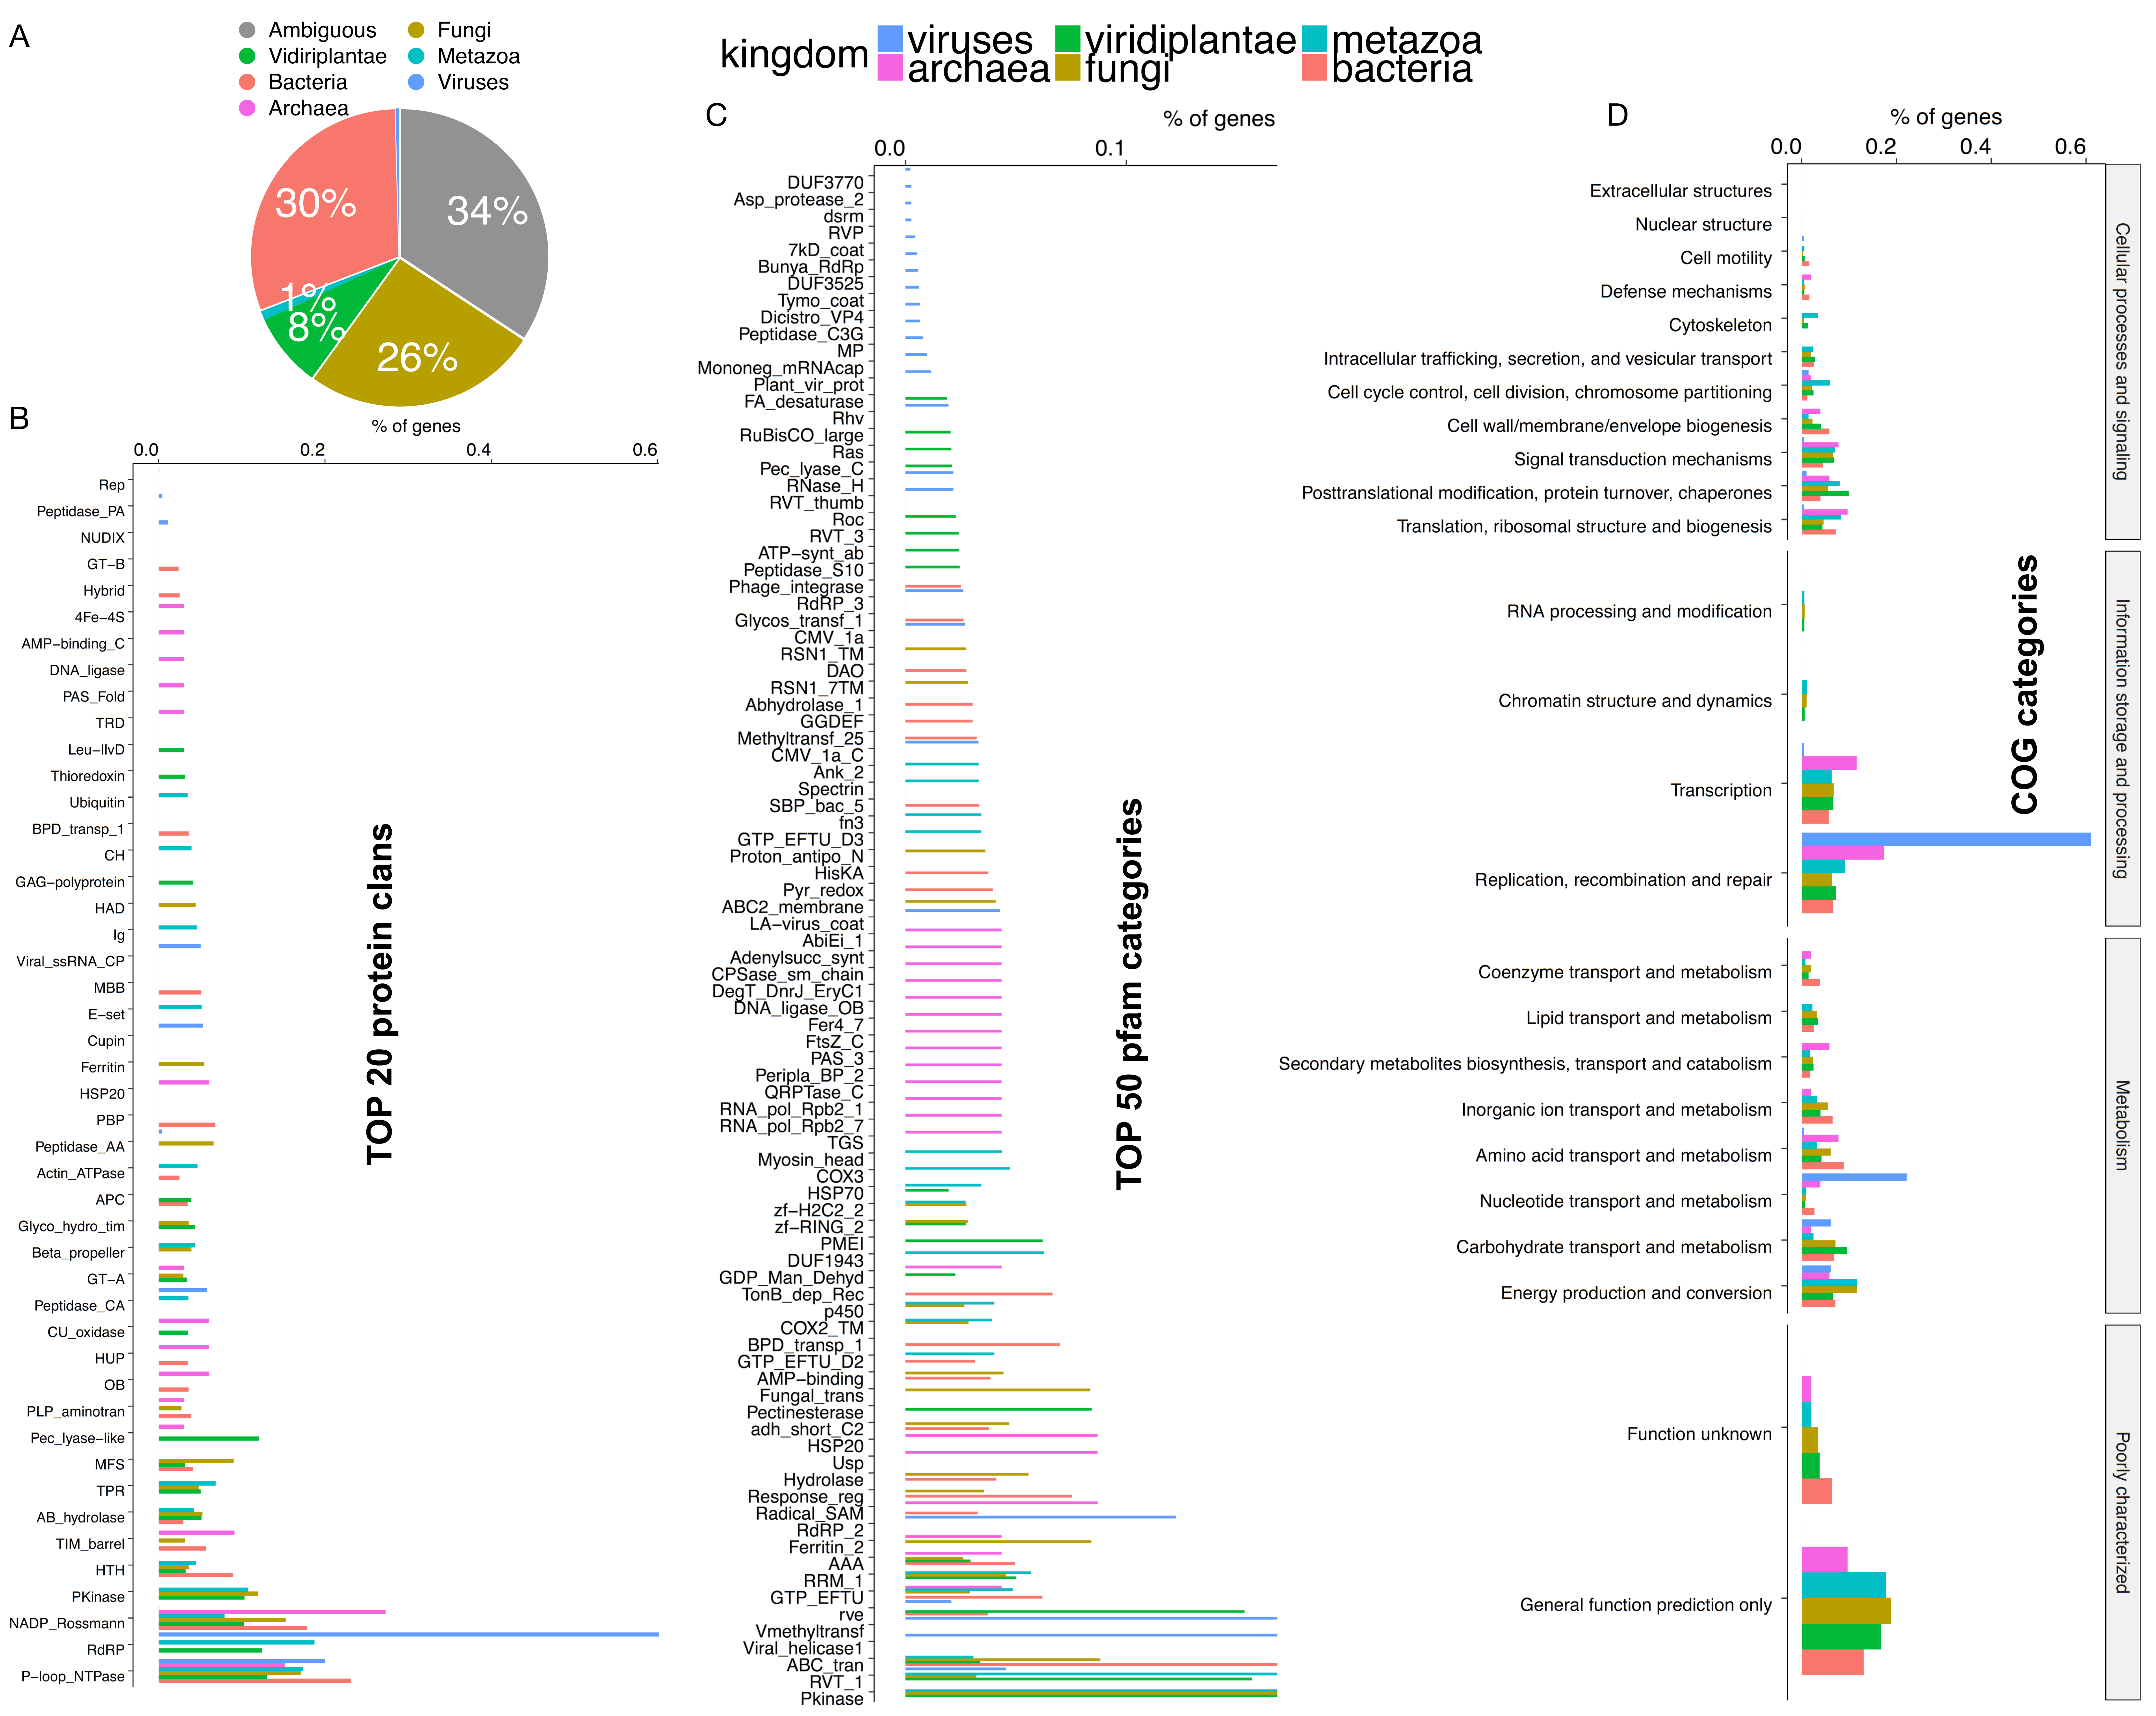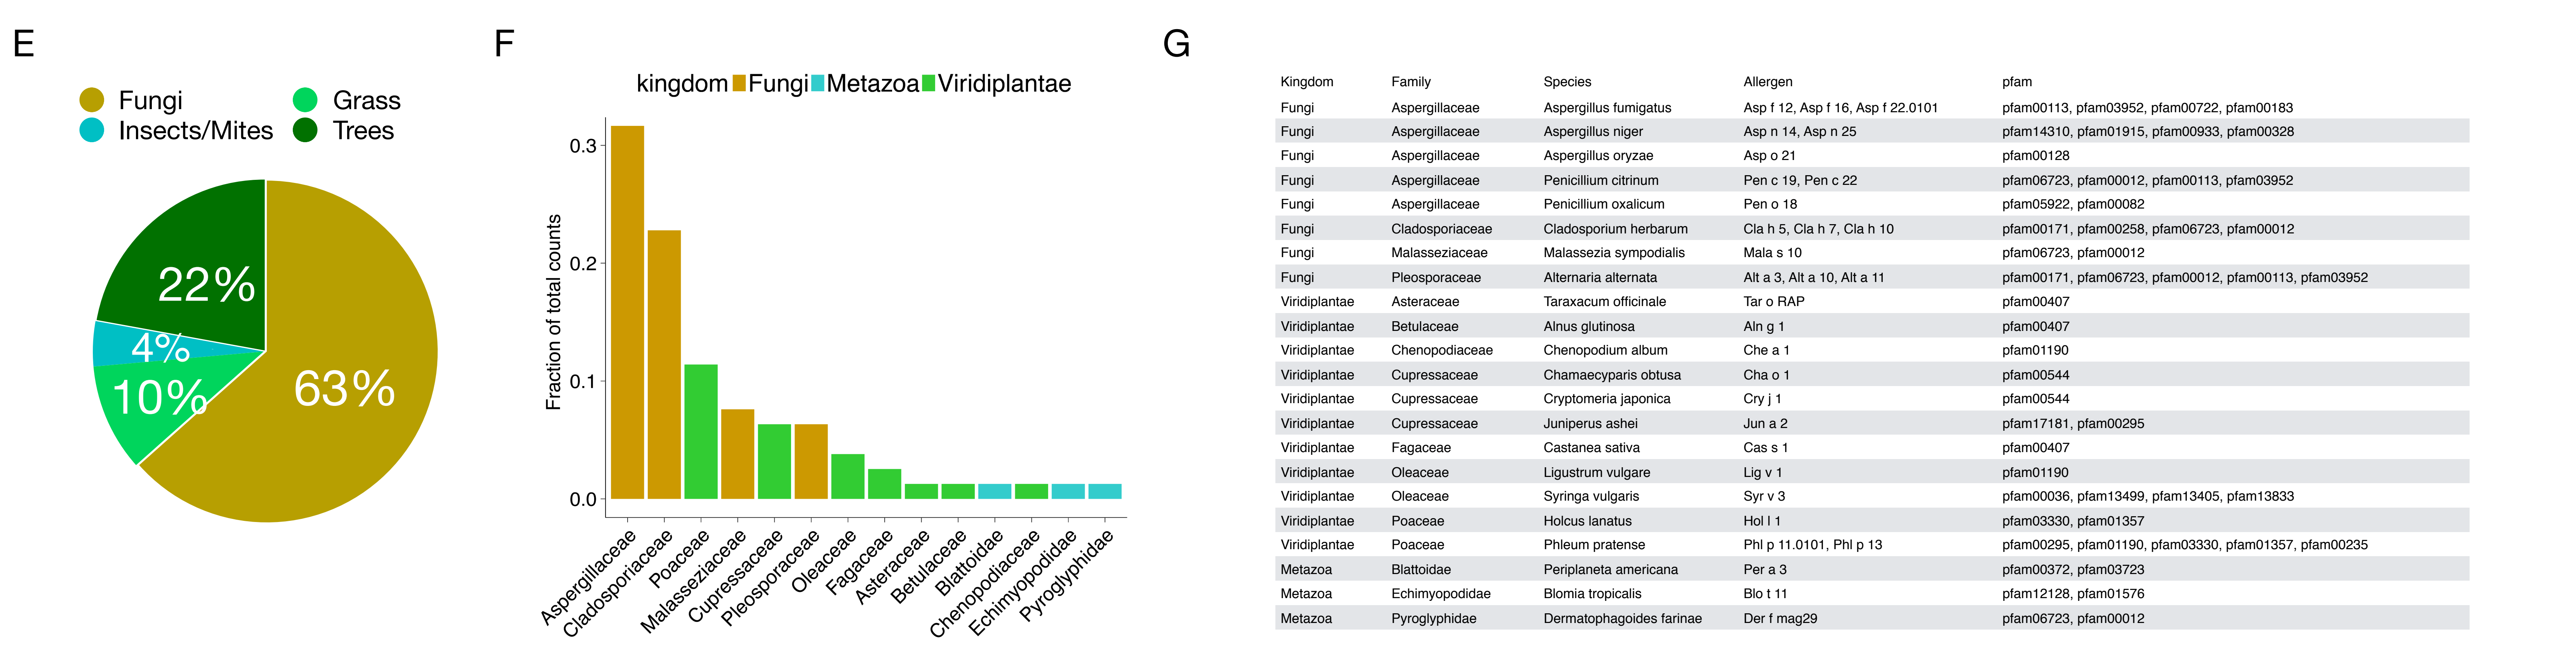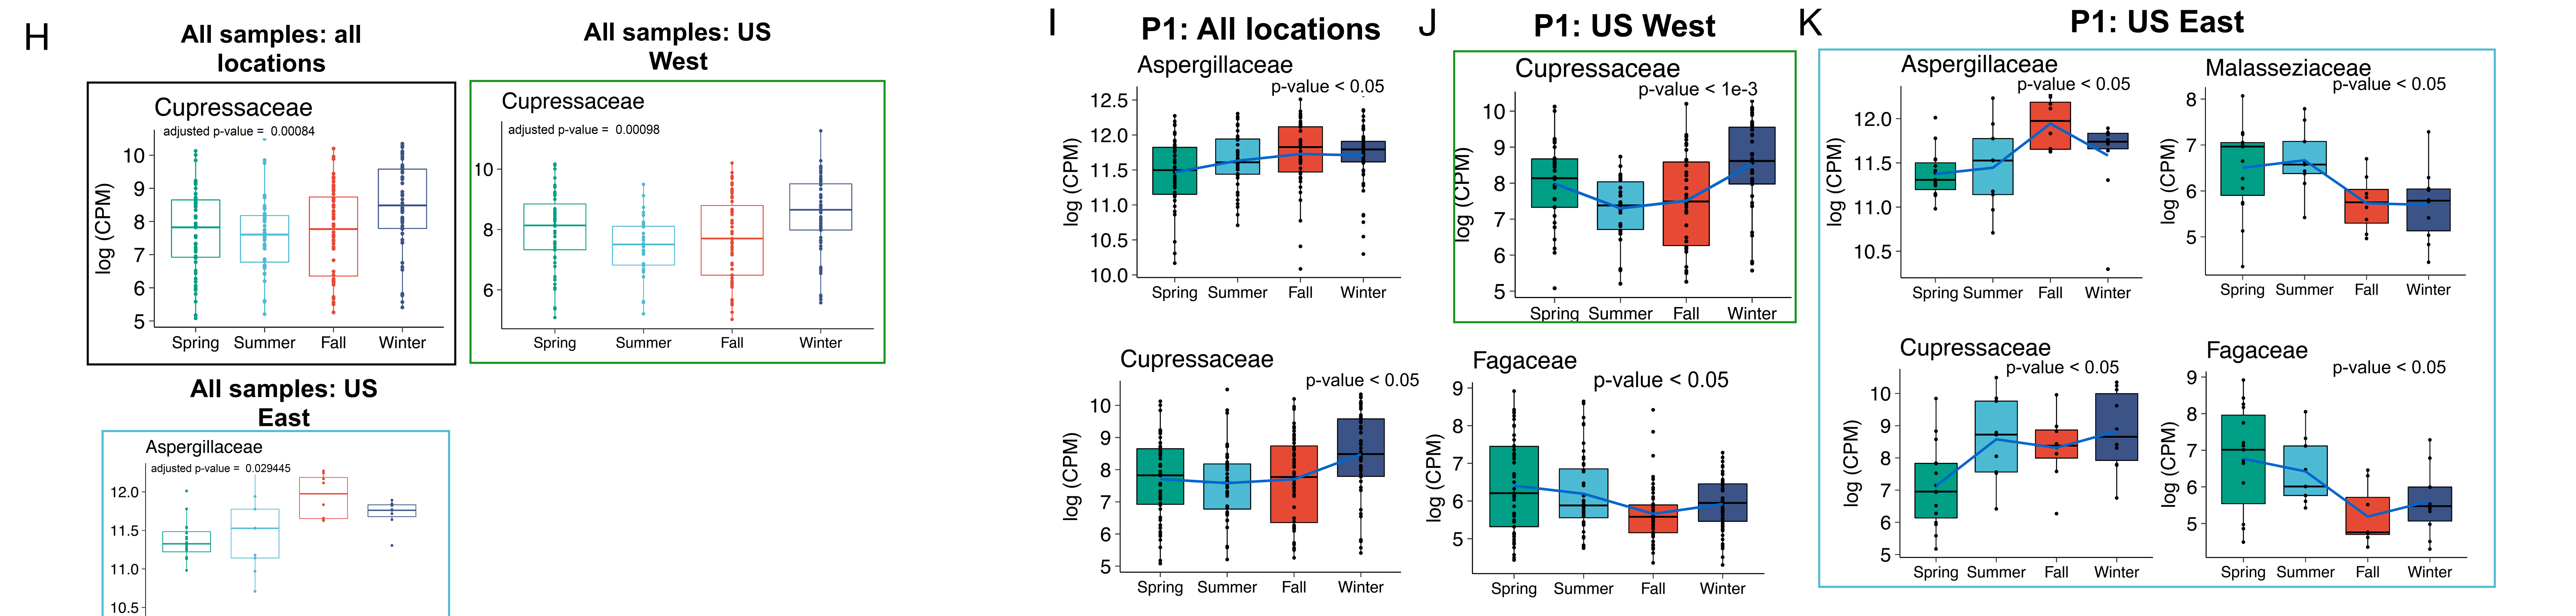

**Fig. S5**

Supplement: NIHMS1507935-supplement-8.pdf [file NIHMS1507935-supplement-8.pdf]
